# Supplementary material
Source: publisher figshare collection journal article supplement (https://acs.figshare.com/ndownloader/files/4356232)
Supplement: Supplementary file 1 [file 4356232]

*Supporting Information for*

**A Convergent Synthesis of the C1—C16 Segment of  
Goniodomin A via Palladium-Catalyzed  
Organostannane—Thioester Coupling**

Haruhiko Fuwa,\* Motohiro Nakajima, Jinglu Shi, Yoshiyuki Takeda, Tomoyuki Saito,  
and Makoto Sasaki\*

*Laboratory of Biostructural Chemistry, Graduate School of Life Sciences, Tohoku  
University, 2-1-1 Katahira, Aoba-ku, Sendai 980-8577, Japan*

\*Email: hfuwa@bios.tohoku.ac.jp; masasaki@bios.tohoku.ac.jp

*Contents*

|                                                                                     |     |
|-------------------------------------------------------------------------------------|-----|
| General methods.....                                                                | S2  |
| Experimental procedures and spectroscopic data for all new compounds.....           | S4  |
| Stereochemical assignment of allylic alcohol <b>29</b> .....                        | S36 |
| Stereochemical assignment of fused acetal <b>33</b> .....                           | S37 |
| Stereochemical assignment of spiroacetal <b>34</b> .....                            | S38 |
| Stereochemical assignment of spiroacetal <b>2</b> .....                             | S39 |
| Copies of <sup>1</sup> H and <sup>13</sup> C NMR spectra for all new compounds..... | S40 |

**General methods.** All reactions sensitive to moisture and/or air were carried out under an atmosphere of argon in dry, freshly distilled solvents under anhydrous conditions using oven-dried glassware unless otherwise noted. Anhydrous dichloromethane ( $\text{CH}_2\text{Cl}_2$ ) was purchased from Kanto Chemical Co. Inc. and used directly without further drying. Anhydrous tetrahydrofuran, diethyl ether, and toluene were purchased from Wako Pure Chemical Industries, Ltd. and further purified by a Glass Contour solvent purification system under an atmosphere of argon immediately prior to use. Diisopropylethylamine, triethylamine, 2,6-lutidine, acetonitrile ( $\text{CH}_3\text{CN}$ ), benzene, and methanol were distilled from calcium hydride under an atmosphere of argon. Hexamethylphosphoramide (HMPA) and 1,3-dimethyl-3,4,5,6-tetrahydro-2(1*H*)-pyrimidinone (DMPU) were distilled from calcium hydride under reduced pressure. *N,N*-dimethylformamide (DMF) and dimethyl sulfoxide (DMSO) were distilled from magnesium sulfate under reduced pressure. All other chemicals were purchased at highest commercial grade and used directly. Analytical thin-layer chromatography (TLC) was performed using E. Merck silica gel 60 F<sub>254</sub> plates (0.25-mm thickness). Flash column chromatography was carried out using Kanto Chemical silica gel 60N (40-100 mesh, spherical, neutral) or Fuji Silysia silica gel BW-300 (200-400 mesh). Optical rotations were recorded on a JASCO P-1020 digital polarimeter. IR spectra were recorded on a JASCO FT/IR-4100 spectrometer.  $^1\text{H}$  and  $^{13}\text{C}$  NMR spectra were recorded on a JEOL JNM-ECA-600 spectrometer or a Varian Unity INOVA 600 spectrometer, and chemical shift values are reported in ppm ( $\delta$ ) downfield from tetramethylsilane with reference to internal solvent [ $^1\text{H}$  NMR,  $\text{CHCl}_3$  (7.24),  $\text{C}_6\text{HD}_5$  (7.15);  $^{13}\text{C}$  NMR,  $\text{CDCl}_3$  (77.0),  $\text{C}_6\text{D}_6$  (128.0)] unless otherwise noted. Coupling constants (*J*) are reported in Hertz (Hz). The following abbreviations

were used to designate the multiplicities: s = singlet; d = doublet; t = triplet; m = multiplet; br = broad. EI and FAB mass spectra were recorded on a JEOL JMS-700 spectrometer and ESI mass spectra were measured on a Bruker microTOFfocus spectrometer.

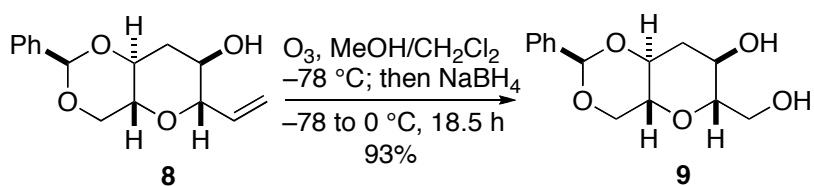

**Diol 9.** Ozone was bubbled through a solution of olefin **8** (2.53 g, 9.65 mmol) in MeOH/CH<sub>2</sub>Cl<sub>2</sub> (1:1, v/v, 100 mL) at  $-78\text{ }^\circ\text{C}$  until a pale blue color was persisted. Oxygen was bubbled through the solution to remove excess ozone. NaBH<sub>4</sub> (1.75 g, 46.3 mmol) was then added to the solution at  $-78\text{ }^\circ\text{C}$ . The resultant solution was allowed to warm to  $0\text{ }^\circ\text{C}$  and stirred at that temperature for 18.5 h. The reaction mixture was quenched with H<sub>2</sub>O. The mixture was diluted with EtOAc, washed with H<sub>2</sub>O and brine, dried over Na<sub>2</sub>SO<sub>4</sub>, filtered, and concentrated under reduced pressure to give diol **9** (2.38 g, 93%) as colorless crystals. An analytically pure sample was obtained by recrystallization from EtOAc: mp  $183\text{--}184\text{ }^\circ\text{C}$ ;  $[\alpha]_{\text{D}}^{23} -30.4$  ( $c$  2.69, MeOH); IR (KBr) 3301, 2868, 1447, 1126, 1107, 1169, 1030, 1010, 982, 971, 745, 695, 647  $\text{cm}^{-1}$ ; <sup>1</sup>H NMR (500 MHz, CDCl<sub>3</sub>)  $\delta$  7.48—7.46 (m, 2H), 7.37—7.33 (m, 3H), 5.51 (s, 1H), 4.30 (dd,  $J = 10.0, 5.0$  Hz, 1H), 3.88 (ddd,  $J = 11.5, 6.5, 4.5$  Hz, 1H), 3.84—3.77 (m, 2H), 3.67 (dd,  $J = 10.0, 10.0$  Hz, 1H), 3.53 (ddd,  $J = 11.0, 9.5, 5.0$  Hz, 1H), 3.40 (ddd,  $J = 10.0, 9.5, 5.0$  Hz, 1H), 3.34 (ddd,  $J = 9.0, 5.0, 4.5$  Hz, 1H), 2.49 (ddd,  $J = 11.0, 5.0, 4.0$  Hz, 1H), 2.12 (d,  $J = 11.5$  Hz, 1H), 1.93 (dd,  $J = 6.5, 5.5$  Hz, 1H), 1.72 (ddd,  $J = 12.0, 11.0, 11.0$  Hz, 1H); <sup>13</sup>C NMR (125 MHz, CDCl<sub>3</sub>)  $\delta$  137.2, 129.1, 128.4 ( $\times 2$ ), 126.1 ( $\times 2$ ), 101.7, 81.5, 76.4, 73.0, 69.2, 66.8, 63.0, 37.9; HRMS (FAB) calcd for C<sub>14</sub>H<sub>19</sub>O<sub>5</sub> [(M + H)<sup>+</sup>] 267.1227, found 267.1236.

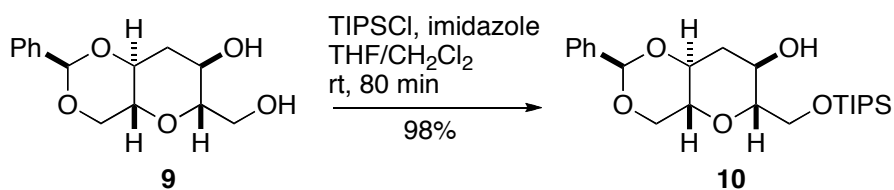





10% EtOAc/hexanes) to afford ketone **11** (743 mg, 96%) as colorless crystals: mp 73—74 °C;  $[\alpha]_D^{23}$   $-3.7$  ( $c$  0.52, benzene); IR (KBr) 3302, 2940, 2864, 1724, 1642, 1462, 1383, 1125, 1013  $\text{cm}^{-1}$ ;  $^1\text{H}$  NMR (500 MHz,  $\text{CDCl}_3$ )  $\delta$  7.50—7.48 (m, 2H), 7.39—7.33 (m, 3H), 5.57 (s, 1H), 4.44 (dd,  $J$  = 10.5, 5.0 Hz, 1H), 4.07—4.02 (m, 3H), 3.97 (ddd,  $J$  = 11.0, 9.5, 6.0 Hz, 1H), 3.78 (dd,  $J$  = 10.5, 10.0 Hz, 1H), 3.66 (ddd,  $J$  = 10.0, 9.5, 5.0 Hz, 1H), 3.02 (dd,  $J$  = 17.0, 6.0 Hz, 1H), 2.59 (dd,  $J$  = 17.0, 11.0 Hz, 1H), 1.13—1.01 (m, 21H);  $^{13}\text{C}$  NMR (125 MHz,  $\text{CDCl}_3$ )  $\delta$  204.8, 137.0, 129.1, 128.3 ( $\times$  2), 126.1 ( $\times$  2), 101.2, 84.6, 75.4, 70.7, 69.2, 63.3, 44.6, 17.8 ( $\times$  6), 11.6 ( $\times$  3); HRMS (FAB) calcd for  $\text{C}_{23}\text{H}_{37}\text{O}_5\text{Si}$   $[(\text{M} + \text{H})^+]$  421.2405, found 421.2416.

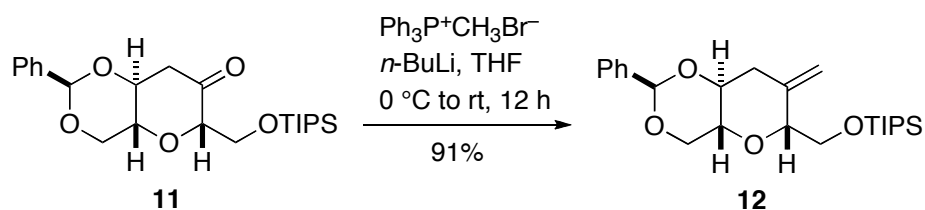

**Olefin 12.** To a suspension of  $\text{Ph}_3\text{P}^+\text{CH}_3\text{Br}^-$  (539.9 mg, 1.511 mmol) in THF (15 mL) at 0 °C was added  $n\text{-BuLi}$  (2.64 M solution in hexane, 0.525 mL, 1.39 mmol), and the resulting ylide suspension was stirred at 0 °C for 30 min. To this solution was added a solution of ketone **11** (124.1 mg, 0.2950 mmol) in THF (2.5 mL + 1.0 mL  $\times$  2), and the resultant mixture was stirred at room temperature for 12 h. The reaction mixture was quenched with saturated aqueous  $\text{NH}_4\text{Cl}$  solution. The mixture was diluted with EtOAc, washed with brine, dried over  $\text{Na}_2\text{SO}_4$ , and concentrated. Purification of the residue by flash column chromatography (silica gel, 0 to 1% EtOAc/hexanes) gave olefin **12** (112.2 mg, 91%) as colorless crystals: mp 70—71 °C;  $[\alpha]_D^{23}$   $-39.2$  ( $c$  0.54, benzene); IR (KBr) 3269, 2942, 2867, 1643, 1631, 1451, 1383, 1107, 1002, 882, 748, 694  $\text{cm}^{-1}$ ;  $^1\text{H}$  NMR (500 MHz,  $\text{CDCl}_3$ )  $\delta$  7.48—7.47 (m, 2H), 7.37—7.31 (m, 3H), 5.53 (s, 1H),



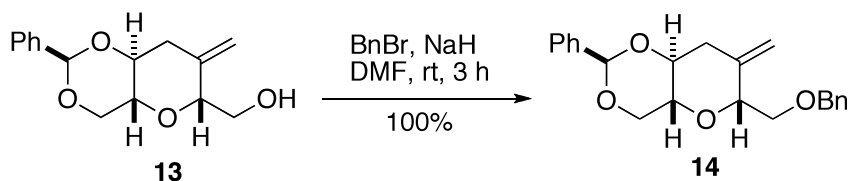

**Benzyl ether 14.** To a solution of alcohol **13** (1.10 g, 4.19 mmol) in DMF (50 mL) at 0 °C was added NaH (60% in mineral oil, 0.420 g, 8.75 mmol), and the resultant solution was stirred at 0 °C for 30 min. To this solution was added benzyl bromide (0.750 mL, 6.31 mmol), and the resultant mixture was allowed to warm to room temperature and stirred for 3 h. The reaction mixture was quenched with saturated aqueous NH<sub>4</sub>Cl solution. The mixture was extracted with Et<sub>2</sub>O, and the organic layer was washed with H<sub>2</sub>O and brine, dried over Na<sub>2</sub>SO<sub>4</sub>, filtered, and concentrated under reduced pressure. Purification of the residue by flash column chromatography (silica gel, 0 to 20% EtOAc/hexanes) gave benzyl ether **14** (1.49 g, 100%) as colorless crystals: mp 108—109 °C:  $[\alpha]_{\text{D}}^{25}$  -25.9 (*c* 1.00, CHCl<sub>3</sub>); IR (KBr) 3088, 3065, 3031, 2953, 2928, 2884, 2856, 1655, 1471, 1462, 1253, 1099, 836, 777, 697 cm<sup>-1</sup>; <sup>1</sup>H NMR (600 MHz, CDCl<sub>3</sub>) δ 7.48—7.37 (m, 2H), 7.37—7.27 (m, 8H), 5.53 (br s, 1H), 4.98 (s, 1H), 4.90 (s, 1H), 4.63 (d, *J* = 12.0 Hz, 1H), 4.57 (d, *J* = 12.0 Hz, 1H), 4.35 (dd, *J* = 10.3, 4.8 Hz, 1H), 4.10 (dd, *J* = 4.5, 6.2 Hz, 1H), 3.80 (dd, *J* = 4.5, 10.3 Hz, 1H), 3.72 (dd, *J* = 10.3, 10.3 Hz, 1H), 3.67 (dd, *J* = 10.3, 6.2 Hz, 1H), 3.61—3.52 (m 2H), 2.74 (dd, *J* = 12.4, 4.5 Hz, 1H), 2.44 (br dd, *J* = 12.4, 12.0 Hz, 1H); <sup>13</sup>C NMR (150 MHz, CDCl<sub>3</sub>) δ 141.2, 137.9, 137.5, 129.0, 128.4 (× 2), 128.3 (× 2), 127.9 (× 2), 127.8, 126.1 (× 2), 111.6, 101.5, 78.8, 77.4, 73.6, 73.5, 69.7, 69.3, 39.1; HRMS (ESI) calcd for C<sub>22</sub>H<sub>24</sub>O<sub>4</sub>Na [(M + Na)<sup>+</sup>] 375.1567, found 375.1572.



were added imidazole (105.5 mg, 1.55 mmol) and TBSCl (195.1 mg, 1.29 mmol), and the resultant solution was stirred at 50 °C for 14.5 h. The reaction mixture was quenched with saturated aqueous NH<sub>4</sub>Cl solution. The mixture was extracted with EtOAc, and the organic layer was washed with brine, dried over Na<sub>2</sub>SO<sub>4</sub>, filtered, and concentrated under reduced pressure. Purification of the residue by flash column chromatography (silica gel, 0 to 2.5% EtOAc/hexanes) gave bis-TBS ether **S1** (182.0 mg, 97%) as a colorless oil:  $[\alpha]_D^{23} +17.2$  (*c* 1.29, CHCl<sub>3</sub>); IR (film) 3088, 3065, 3031, 2953, 2928, 2884, 2856, 1655, 1471, 1462, 1253, 1099, 836, 777, 697 cm<sup>-1</sup>; <sup>1</sup>H NMR (600 MHz, CDCl<sub>3</sub>)  $\delta$  7.34—7.24 (m, 4H), 7.26 (m, 1H), 4.82 (br s, 1H), 4.79 (br s, 1H), 4.61 (d, *J* = 12.0 Hz, 1H), 4.56 (d, *J* = 12.0 Hz, 1H), 3.98 (dd, *J* = 5.5, 5.5 Hz, 1H), 3.84 (dd, *J* = 11.3, 2.0 Hz, 1H), 3.75 (dd, *J* = 10.3, 5.5 Hz, 1H), 3.71 (dd, *J* = 11.3, 4.9 Hz, 1H), 3.63 (dd, *J* = 10.3, 5.5 Hz, 1H), 3.62 (m 1H), 3.25 (ddd, *J* = 8.6, 4.9, 2.0 Hz, 1H), 2.56 (dd, *J* = 12.1, 5.2 Hz, 1H), 2.19 (dd, *J* = 12.1, 10.3 Hz, 1H), 0.86 (s, 18H), 0.05 (s, 3H), 0.043 (s, 3H), 0.038 (s, 3H), 0.029 (s, 3H); <sup>13</sup>C NMR (150 MHz, CDCl<sub>3</sub>)  $\delta$  142.9, 138.2, 128.3 ( $\times$  2), 127.8 ( $\times$  2), 127.5, 108.9, 83.0, 76.5, 73.6, 70.5, 68.0, 63.1, 42.8, 26.0 ( $\times$  3), 25.8 ( $\times$  3), 18.5, 17.9, -4.3, -4.9, -5.0, -5.2; HRMS (ESI) calcd for C<sub>27</sub>H<sub>48</sub>O<sub>4</sub>Si<sub>2</sub>Na [(M + Na)<sup>+</sup>] 515.2983, found 515.2989.

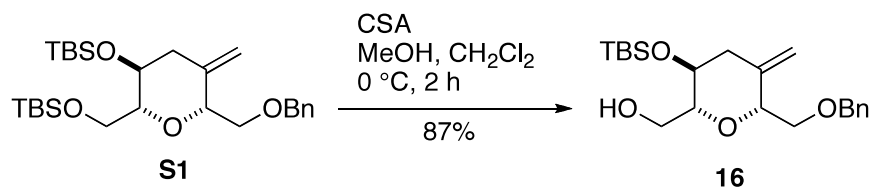

**Alcohol 16.** To a solution of bis-TBS ether **S1** (1.30 g, 2.64 mmol) in MeOH/CH<sub>2</sub>Cl<sub>2</sub> (1:1, v/v, 26 mL) was added CSA (66.1 mg, 0.285 mmol), and the resultant solution was stirred at 0 °C for 2 h. The reaction mixture was quenched with saturated aqueous NaHCO<sub>3</sub> solution. The mixture was diluted with EtOAc, and the organic layer was

washed with brine, dried over Na<sub>2</sub>SO<sub>4</sub>, filtered, and concentrated under reduced pressure. Purification of the residue by flash column chromatography (silica gel, 0 to 15% EtOAc/hexanes) gave alcohol **16** (0.870 g, 87%) as a colorless oil:  $[\alpha]_D^{24} +10.8$  ( $c$  1.00, CHCl<sub>3</sub>); IR (film) 3459, 3087, 3063, 3031, 2952, 2928, 2856, 1655, 1253, 1095, 837, 776 cm<sup>-1</sup>; <sup>1</sup>H NMR (600 MHz, CDCl<sub>3</sub>)  $\delta$  7.33 (m, 4H), 7.30—7.26 (m, 1H), 4.86 (br s, 1H), 4.80 (br s, 1H), 4.59 (d,  $J$  = 12.4 Hz, 1H), 4.56 (d,  $J$  = 12.4 Hz, 1H), 4.01 (br dd,  $J$  = 4.4, 5.8 Hz, 1H), 3.83 (br dd,  $J$  = 11.3, 3.1 Hz, 1H), 3.75 (dd,  $J$  = 10.0, 4.4 Hz, 1H), 3.64 (dd,  $J$  = 10.0, 5.8 Hz, 1H), 3.61 (br dd,  $J$  = 11.3, 5.8 Hz, 1H), 3.57 (ddd,  $J$  = 11.0, 8.9, 5.2 Hz, 1H), 3.34 (ddd,  $J$  = 8.9, 5.3, 3.1 Hz, 1H), 2.59 (dd,  $J$  = 13.0, 5.2 Hz, 1H), 2.22 (dd,  $J$  = 13.0, 11.0 Hz, 1H), 2.14 (br s, 1H), 0.86 (s, 9H), 0.06 (s, 3H), 0.05 (s, 3H); <sup>13</sup>C NMR (150 MHz, CDCl<sub>3</sub>)  $\delta$  142.0, 137.9, 128.4 ( $\times$  2), 127.84 ( $\times$  2), 127.77, 109.7, 82.1, 76.5, 73.5, 70.1, 68.7, 62.7, 43.0, 25.7 ( $\times$  3), 17.9, -4.2, -5.0; HRMS (ESI) calcd for C<sub>21</sub>H<sub>34</sub>O<sub>4</sub>SiNa [(M + Na)<sup>+</sup>] 401.2119, found 401.2124.

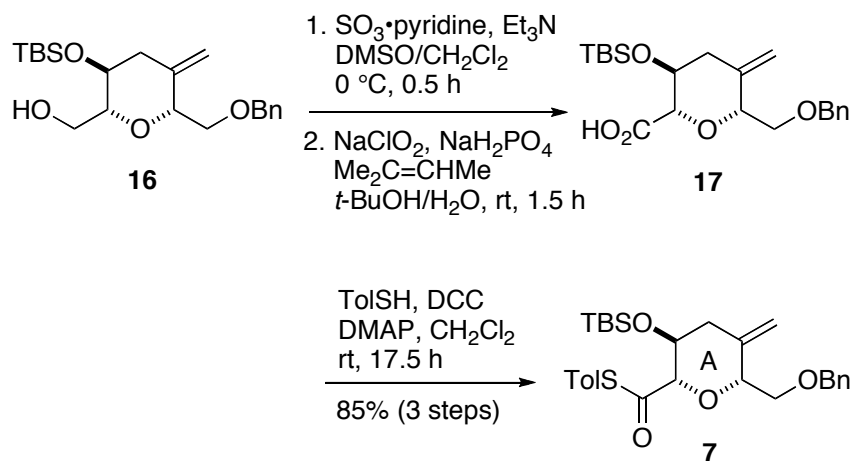

**Thioester 7.** To a solution of alcohol **16** (34.3 mg, 0.0906 mmol) in CH<sub>2</sub>Cl<sub>2</sub>/DMSO (1:1, v/v, 0.9 mL) was added Et<sub>3</sub>N (0.0650 ml, 0.466 mmol). To this mixture cooled to 0 °C was added SO<sub>3</sub>·pyridine (57.7 mg, 0.363 mmol), and the resultant solution was stirred at 0 °C for 0.5 h. The reaction mixture was extracted with Et<sub>2</sub>O, and the organic layer

was washed successively with 1 M aqueous HCl solution, saturated aqueous NaHCO<sub>3</sub> solution, and brine, dried over MgSO<sub>4</sub>, filtered, and concentrated under reduced pressure. The crude aldehyde was used immediately in the next reaction without purification.

To a solution of the above crude aldehyde, 2-methyl-2-butene (0.0950 mL, 0.897 mmol), and NaH<sub>2</sub>PO<sub>4</sub> (12.0 mg, 0.100 mmol) in *t*-BuOH/H<sub>2</sub>O (5:1, v/v, 0.9 mL) at 0 °C was added NaClO<sub>2</sub> (24.6 mg, 0.272 mmol), and the resultant mixture was stirred at room temperature for 1.5 h. The reaction mixture was poured into CHCl<sub>3</sub>/H<sub>2</sub>O. The aqueous layer was acidified (pH 3) with 1 M aqueous HCl solution, and the organic layer was separated. The aqueous layer was extracted with CHCl<sub>3</sub>. The combined organic layer was washed with brine, dried over Na<sub>2</sub>SO<sub>4</sub>, filtered and concentrated under reduced pressure. The crude carboxylic acid **17** was used immediately in the next reaction without purification.

To a solution of the above crude carboxylic acid **17** in CH<sub>2</sub>Cl<sub>2</sub> (0.9 mL) at 0 °C were added *p*-toluenethiol (12.4 mg, 0.0998 mmol), DMAP (1.2 mg, 0.0098 mmol), and DCC (20.6 mg, 0.0998 mmol), and the resultant solution was allowed to warm to room temperature and stirred for 17.5 h. The reaction mixture was diluted with Et<sub>2</sub>O. Insoluble materials were filtered off, and the filtrate was washed with H<sub>2</sub>O and brine. The organic layer was dried over MgSO<sub>4</sub>, filtered, and concentrated under reduced pressure. Purification of the residue by flash column chromatography (silica gel, 0 to 2% EtOAc/hexanes) gave thioester **7** (38.5 mg, 85% for the three steps) as a colorless oil: [α]<sub>D</sub><sup>25</sup> −35.2 (*c* 0.84, CHCl<sub>3</sub>); IR (film) 3734, 3063, 3028, 2951, 2927, 2884, 2856, 1707, 1253, 1109, 837, 808, 779 cm<sup>−1</sup>; <sup>1</sup>H NMR (600 MHz, CDCl<sub>3</sub>) δ 7.39—7.38 (m, 2H), 7.35—7.32 (m, 2H), 7.28—7.26 (m, 3H), 7.20—7.19 (m, 2H), 4.93 (br s, 1H), 4.91



(br s, 1H), 4.68 (d,  $J = 12.4$  Hz, 1H), 4.64 (d,  $J = 12.4$  Hz, 1H), 4.18 (br dd,  $J = 6.2$ , 4.5 Hz, 1H), 4.01 (d,  $J = 7.6$  Hz, 1H), 3.98 (ddd,  $J = 8.2$ , 7.6, 4.5 Hz, 1H), 3.82 (dd,  $J = 10.3$ , 4.5 Hz, 1H), 3.74 (dd,  $J = 10.3$ , 6.2 Hz, 1H), 2.66 (dd,  $J = 13.4$ , 4.5 Hz, 1H), 2.35 (s, 3H), 2.29 (dd,  $J = 13.4$ , 8.2 Hz, 1H), 0.84 (s, 9H), 0.03 (s, 3H), 0.00 (s, 3H);  $^{13}\text{C}$  NMR (150 MHz,  $\text{CDCl}_3$ )  $\delta$  196.1, 140.8, 139.5, 138.1, 134.6 ( $\times 2$ ), 130.0 ( $\times 2$ ), 128.4 ( $\times 2$ ), 127.8 ( $\times 2$ ), 127.7, 123.7, 110.8, 86.9, 77.2, 73.6, 70.4, 70.1, 41.6, 25.7 ( $\times 3$ ), 21.3, 17.9, -4.6, -4.9; HRMS (ESI) calcd for  $\text{C}_{28}\text{H}_{38}\text{O}_4\text{SSiNa}$   $[(\text{M} + \text{Na})^+]$  521.2152, found 521.2158.

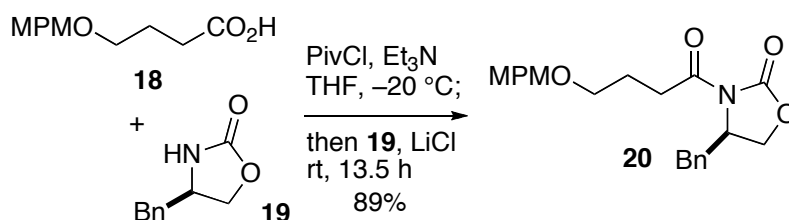

**Oxazolidinone 20.** To a solution of carboxylic acid **18**<sup>1</sup> (1.03 g, 4.59 mmol) and Et<sub>3</sub>N (1.95 ml, 14.0 mmol) in THF (30 mL) cooled to -20 °C was added PivCl (0.675 ml, 5.54 mmol), and the resultant mixture was stirred at -20 °C for 2.5 h. To this mixture were added LiCl (292.0 mg, 6.888 mmol) and a solution of (*R*)-4-benzyl-2-oxazolidinone (**19**) (813.4 mg, 4.590 mmol) in THF (16 mL), and the resultant mixture was stirred at room temperature for 13.5 h. The reaction mixture was diluted with EtOAc, and the organic layer was washed with H<sub>2</sub>O and brine, dried over Na<sub>2</sub>SO<sub>4</sub>, filtered, and concentrated under reduced pressure. The residue was purified by flash column chromatography (silica gel, 30% EtOAc/hexanes) to give oxazolidinone **20** (1.57 g, 89%) as a pale yellow oil:  $[\alpha]_{\text{D}}^{24} -37.8$  ( $c$  1.00,  $\text{CHCl}_3$ ); IR (film) 3061, 3028, 3001, 2931, 2859, 1780, 1699, 1513, 1388, 1248, 1211, 1097, 1032, 703  $\text{cm}^{-1}$ ;  $^1\text{H}$  NMR (600 MHz,  $\text{CDCl}_3$ )  $\delta$  7.32—7.29 (m, 2H), 7.26—7.23 (m, 3H), 7.17—7.16 (m,

2H), 6.85—6.83 (m, 2H), 4.57 (ddd,  $J = 13.4, 6.5, 3.5$  Hz, 1H), 4.41 (s, 2H), 4.10—4.08 (m, 2H), 3.76 (s, 3H), 3.54—3.51 (m, 2H), 3.23 (dd,  $J = 13.4, 3.4$  Hz, 1H), 3.04—3.02 (m, 2H), 2.65 (dd,  $J = 13.4, 9.6$  Hz, 1H), 2.02—1.97 (m, 2H);  $^{13}\text{C}$  NMR (150 MHz,  $\text{CDCl}_3$ )  $\delta$  173.1, 159.1, 153.4, 135.4, 130.5, 129.4 ( $\times 2$ ), 129.3 ( $\times 2$ ), 128.9 ( $\times 2$ ), 127.3, 113.7 ( $\times 2$ ), 72.5, 68.9, 66.1, 55.22, 55.15, 37.8, 32.5, 24.5; HRMS (ESI) calcd for  $\text{C}_{22}\text{H}_{25}\text{O}_5\text{NNa}$   $[(\text{M} + \text{Na})^+]$  406.1625, found 406.1622.

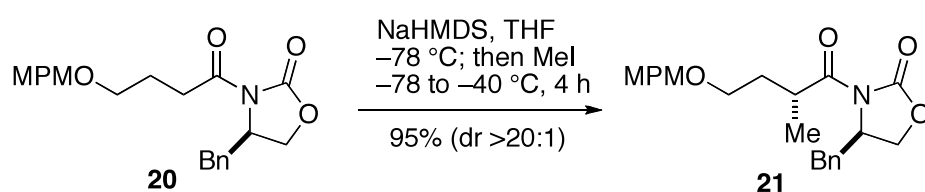

**Methylated product 21.** To a solution of oxazolidinone **20** (821.2 mg, 2.142 mmol) in THF (22 mL) at  $-78\text{ }^\circ\text{C}$  was added NaHMDS (1.0 M solution in THF, 3.00 mL, 3.00 mmol), and the resultant solution was stirred at  $-78\text{ }^\circ\text{C}$  for 1 h. To this mixture was added MeI (0.725 mL, 4.77 mmol), and the resultant solution was stirred at  $-78\text{ }^\circ\text{C}$  for 3 h and then at  $-40\text{ }^\circ\text{C}$  for 1 h. The reaction was quenched with saturated aqueous  $\text{NH}_4\text{Cl}$  solution and extracted with  $\text{Et}_2\text{O}$ . The organic layer was washed with brine, dried over  $\text{MgSO}_4$ , filtered, and concentrated under reduced pressure. The residue was purified by flash column chromatography (silica gel, 20 to 30%  $\text{EtOAc}$ /hexanes) to give methylated product **21** (805.6 mg, 95%, dr >20:1 by 600 MHz  $^1\text{H}$  NMR analysis) as a yellow oil:  $[\alpha]_{\text{D}}^{24} -57.7$  ( $c$  1.00,  $\text{CHCl}_3$ ); IR (film) 3028, 2930, 2857, 1777, 1696, 1513, 1385, 1247, 1207, 1091, 1032, 702  $\text{cm}^{-1}$ ;  $^1\text{H}$  NMR (600 MHz,  $\text{CDCl}_3$ )  $\delta$  7.32—7.28 (m, 2H), 7.25—7.20 (m, 3H), 7.15—7.13 (m, 2H), 6.82—6.79 (m, 2H), 4.38 (m, 1H), 4.33 (s, 2H), 3.97 (dd,  $J = 9.6, 3.1$  Hz, 1H), 3.90 (m, 1H), 3.75 (m, 1H), 3.72 (s, 3H), 3.50 (m, 2H), 3.18 (dd,  $J = 13.4, 3.1$  Hz, 1H), 2.68 (dd,  $J = 13.4, 9.6$  Hz, 1H), 2.12 (dddd,  $J = 14.0, 8.2, 8.2, 5.5$  Hz, 1H), 1.71 (dddd,  $J = 14.0, 5.5, 5.5, 4.8$  Hz, 1H) 1.21 (d,  $J = 6.8$

Hz, 3H);  $^{13}\text{C}$  NMR (150 MHz,  $\text{CDCl}_3$ )  $\delta$  177.1, 159.1, 153.2, 135.4, 130.6, 129.4 ( $\times 2$ ), 129.2 ( $\times 2$ ), 128.8 ( $\times 2$ ), 127.2, 113.6 ( $\times 2$ ), 72.4, 68.1, 65.8, 55.24, 55.22, 38.0, 35.1, 33.6, 18.0; HRMS (ESI) calcd for  $\text{C}_{23}\text{H}_{27}\text{O}_5\text{NNa}$   $[(\text{M} + \text{Na})^+]$  420.1781, found 420.1779.

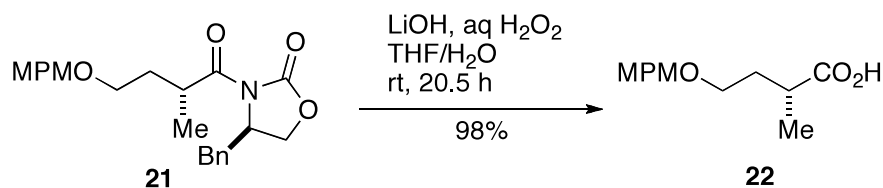

**Carboxylic acid 22.** To a solution of methylated product **21** (785.1 mg, 1.98 mmol) in THF/ $\text{H}_2\text{O}$  (4:1, v/v, 30 mL) at 0 °C were added 30% aqueous  $\text{H}_2\text{O}_2$  solution (0.951 mL, 8.39 mmol) and a solution of  $\text{LiOH}\cdot\text{H}_2\text{O}$  (140.5 mg, 3.348 mmol) in  $\text{H}_2\text{O}$  (4.2 mL), and the resultant solution was allowed to warm to room temperature and stirred for 20.5 h. The reaction mixture was cooled to 0 °C, quenched with saturated aqueous  $\text{Na}_2\text{SO}_3$  solution, and stirred at 0 °C for 10 min. The reaction mixture was diluted with EtOAc and acidified with 0.1 M aqueous HCl solution (pH 3). The whole mixture was extracted with EtOAc, and the organic layer was washed with brine, dried over  $\text{Na}_2\text{SO}_4$ , filtered, and concentrated under reduced pressure. The residue was purified by flash column chromatography (silica gel, 15 to 30% EtOAc/hexanes) to give carboxylic acid **22** (462.5 mg, 98%) as a colorless oil:  $[\alpha]_{\text{D}}^{25}$   $-16.9$  ( $c$  1.00,  $\text{CHCl}_3$ ); IR (film) 2935, 2859, 1811, 1742, 1612, 1513, 1458, 1362, 1302, 1248, 1173, 1096, 1033, 819  $\text{cm}^{-1}$ ;  $^1\text{H}$  NMR (600 MHz,  $\text{CDCl}_3$ )  $\delta$  7.23—7.20 (m, 2H), 6.86—6.83 (m, 2H), 4.40 (d,  $J$  = 12.9 Hz, 1H), 4.37 (d,  $J$  = 12.9 Hz, 1H), 3.77 (s, 3H), 3.47 (t,  $J$  = 6.2 Hz, 2H), 2.70 (ddq,  $J$  = 6.8, 6.8, 6.8 Hz, 1H), 2.02 (dddd,  $J$  = 13.7, 6.8, 6.2, 6.2 Hz, 1H), 1.69 (dddd,  $J$  = 13.7, 6.8, 6.2, 6.2 Hz, 1H), 1.18 (d,  $J$  = 6.8 Hz, 3H) (one proton missing presumably due to H/D exchange);  $^{13}\text{C}$  NMR (150 MHz,  $\text{CDCl}_3$ )  $\delta$  172.1, 159.2, 130.3, 129.3 ( $\times 2$ ), 113.8

( $\times 2$ ), 72.7, 67.0, 55.3, 37.5, 32.8, 16.3; HRMS (ESI) calcd for  $C_{13}H_{18}O_4Na$   $[(M + Na)^+]$  261.1097, found 261.1097.

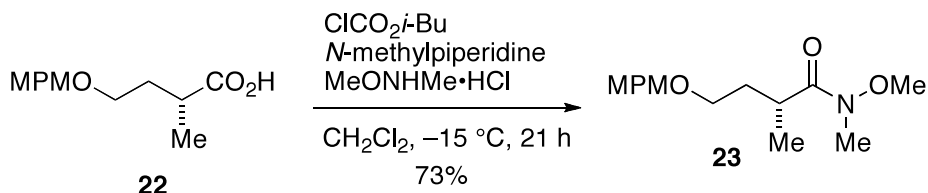

**Weinreb amide 23.** To a solution of carboxylic acid **22** (459.0 mg, 1.926 mmol) in  $CH_2Cl_2$  (15 mL) at  $-15\text{ }^\circ\text{C}$  were added  $N\text{-methylpiperidine}$  (0.725 mL, 5.94 mmol) and isobutyl chloroformate (0.385 mL, 2.93 mmol), and the resultant mixture was stirred at  $-15\text{ }^\circ\text{C}$  for 80 min. To the mixture was added  $MeNHOMe \cdot HCl$  (339.2 mg, 3.48 mmol), and the resultant mixture was stirred at  $-15\text{ }^\circ\text{C}$  for 21 h. The reaction mixture was quenched with saturated aqueous  $NaHCO_3$  solution. The mixture was extracted with  $EtOAc$ , and the organic layer was washed with brine, dried over  $Na_2SO_4$ , filtered, and concentrated under reduced pressure. The residue was purified by flash column chromatography (silica gel, 20 to 50%  $EtOAc$ /hexanes) to give Weinreb amide **23** (397.4 mg, 73%) as a colorless oil:  $[\alpha]_D^{25} -19.4$  ( $c$  1.00,  $CHCl_3$ ); IR (film) 2964, 2936, 2861, 1659, 1613, 1514, 1463, 1248, 1174, 1093, 1034, 994, 820  $cm^{-1}$ ;  $^1H$  NMR (600 MHz,  $CDCl_3$ )  $\delta$  7.22—7.20 (m, 2H), 6.85—6.82 (m, 2H), 4.39 (d,  $J = 11.7$  Hz, 1H), 4.36 (d,  $J = 11.7$  Hz, 1H), 3.77 (s, 3H), 3.63 (s, 3H), 3.46 (ddd,  $J = 9.6, 5.8, 5.8$  Hz, 1H), 3.39 (ddd,  $J = 9.6, 7.6, 5.2$  Hz, 1H), 3.14 (s, 3H), 3.10 (m, 1H), 1.99 (dddd,  $J = 13.7, 8.6, 5.8, 5.2$  Hz, 1H), 1.63 (dddd,  $J = 13.7, 7.6, 5.9, 5.8$  Hz, 1H), 1.09 (d,  $J = 6.9$  Hz, 3H);  $^{13}C$  NMR (150 MHz,  $C_6D_6$ )  $\delta$  159.6, 131.3, 129.3 ( $\times 2$ ), 128.2, 114.0 ( $\times 2$ ), 72.6, 68.2, 60.9, 54.7, 34.1, 32.4, 32.2, 17.9; HRMS (ESI) calcd for  $C_{15}H_{23}O_4NNa$   $[(M + Na)^+]$  304.1519, found 304.1523.

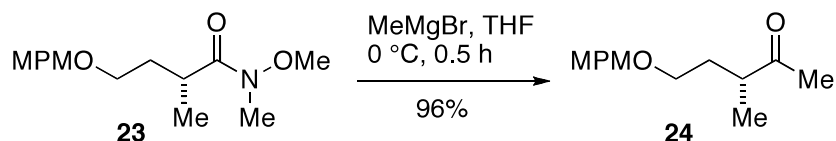

**Methyl ketone 24.** To a solution of Weinreb amide **23** (35.4 mg, 0.126 mmol) in THF (1.3 mL) at 0 °C was added MeMgBr (3.0 M solution in Et<sub>2</sub>O, 0.130 mL, 0.390 mmol), and the resultant solution was stirred at 0 °C for 30 min. The reaction was quenched with saturated aqueous NH<sub>4</sub>Cl solution. The mixture was extracted with Et<sub>2</sub>O, and the organic layer was washed with brine, dried over MgSO<sub>4</sub>, filtered, and concentrated under reduced pressure. The residue was purified by flash column chromatography (silica gel, 10% EtOAc/hexanes) to give methyl ketone **24** (28.5 mg, 96%) as a colorless oil:  $[\alpha]_D^{25} -8.0$  ( $c$  1.00, CHCl<sub>3</sub>); IR (film) 2964, 2934, 2859, 1711, 1613, 1514, 1457, 1361, 1302, 1248, 1173, 1095, 1034, 820 cm<sup>-1</sup>; <sup>1</sup>H NMR (600 MHz, CDCl<sub>3</sub>)  $\delta$  7.22—7.20 (m, 2H), 6.86—6.84 (m, 2H), 4.37 (s, 2H), 3.78 (s, 3H), 3.42 (m, 2H), 2.69 (ddq,  $J$  = 6.8, 6.8, 6.8 Hz, 1H), 2.11 (s, 3H), 1.98 (dddd,  $J$  = 14.1, 7.2, 6.8, 5.8 Hz, 1H), 1.58 (dddd,  $J$  = 14.1, 6.8, 6.2, 6.2 Hz, 1H), 1.06 (d,  $J$  = 6.8 Hz, 3H); <sup>13</sup>C NMR (150 MHz, CDCl<sub>3</sub>)  $\delta$  212.5, 159.1, 130.4, 129.3 ( $\times$  2), 113.7 ( $\times$  2), 72.6, 67.6, 55.3, 44.0, 32.7, 28.3, 16.3; HRMS (ESI) calcd for C<sub>14</sub>H<sub>20</sub>O<sub>3</sub>Na [(M + Na)<sup>+</sup>] 259.1305, found 259.1304.

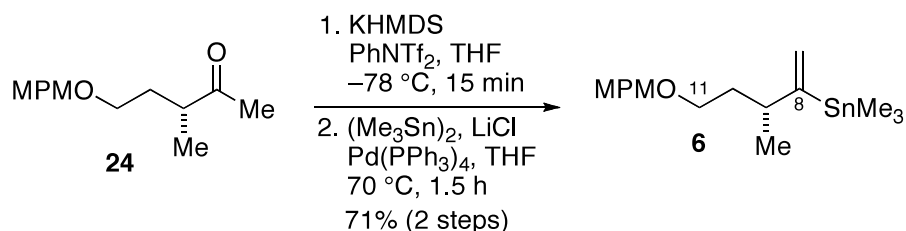

**Vinylstannane 6.** To a solution of methyl ketone **24** (688 mg, 2.91 mmol) and PhNTf<sub>2</sub> (1.37 g, 3.49 mmol) in THF (29 mL) at -78 °C was added KHMDS (7.00 mL, 0.5 M

solution in toluene, 3.50 mmol), and the resultant solution was stirred at  $-78\text{ }^{\circ}\text{C}$  for 15 min. The reaction mixture was quenched with saturated aqueous  $\text{NH}_4\text{Cl}$  solution. The mixture was extracted with EtOAc, and the organic layer was washed with brine, dried over  $\text{Na}_2\text{SO}_4$ , filtered, and concentrated under reduced pressure. The residue was purified by flash column chromatography (silica gel, 2 to 20% EtOAc/hexanes) to give an enol triflate, which was used immediately in the next reaction.

To a suspension of LiCl (1.23 g, 29.1 mmol) and  $\text{Pd}(\text{PPh}_3)_4$  (336 mg, 0.291 mmol) in THF (15 mL) were added a solution of the above enol triflate in THF (14.2 mL) and hexamethylditin (1.20 mL, 5.82 mmol), and the resultant solution was stirred at  $70\text{ }^{\circ}\text{C}$  for 1.5 h. The reaction mixture was cooled to room temperature and diluted with  $\text{Et}_2\text{O}$ . Insoluble materials were filtered off, and the filtrate was concentrated under reduced pressure. The residue was purified by flash column chromatography (silica gel, 0 to 50 % benzene/hexanes, then 20% EtOAc/hexanes) to give vinylstannane **6** (847 mg, 71% for the two steps) as a colorless oil:  $[\alpha]_{\text{D}}^{25} -12.1$  ( $c$  1.00,  $\text{C}_6\text{H}_6$ ); IR (film) 3033, 2954, 2931, 2856, 1613, 1513, 1456, 1362, 1302, 1248, 1173, 1097, 1038, 917, 820, 768, 710, 526,  $511\text{ cm}^{-1}$ ;  $^1\text{H}$  NMR (600 MHz,  $\text{C}_6\text{D}_6$ )  $\delta$  7.25—7.23 (m, 2H), 6.81—6.80 (m, 2H), 5.72 (dd,  $J = 1.3, 1.3\text{ Hz}$ , 1H), 5.19 (d,  $J = 1.3\text{ Hz}$ , 1H), 4.34 (s, 2H), 3.38 (m, 2H), 3.29 (s, 3H), 2.63 (m, 1H), 1.69 (m, 2H), 1.02 (d,  $J = 6.8\text{ Hz}$ , 3H), 0.16 (s, 9H);  $^{13}\text{C}$  NMR (150 MHz,  $\text{C}_6\text{D}_6$ )  $\delta$  161.3, 159.7, 131.4, 129.3 ( $\times 2$ ), 124.0, 114.0 ( $\times 2$ ), 72.8, 68.5, 54.7, 42.7, 37.5, 22.1,  $-8.3$  ( $\times 3$ ); HRMS (ESI) calcd for  $\text{C}_{17}\text{H}_{28}\text{O}_2\text{SnNa}$   $[(\text{M} + \text{Na})^+]$  407.1003, found 407.1009.

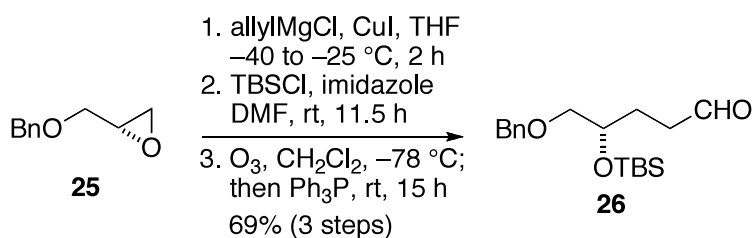

**Aldehyde 26.** To a suspension of copper(I) iodide (250 mg, 1.31 mmol) in THF (30 mL) at -40 °C was added allylmagnesium chloride (2.0 M solution in THF, 9.8 mL, 19.6 mmol), and the resultant mixture was stirred at -40 °C for 30 min. To the mixture was added a solution of benzyl (*S*)-glycidyl ether (**25**) (2.00 mL, 13.1 mmol) in THF (35 mL), and the resultant mixture was stirred at -40 °C for 15 min and then at -25 °C for 1.75 h. The reaction mixture was quenched with saturated aqueous NH<sub>4</sub>Cl solution. The mixture was extracted with EtOAc, and the organic layer was washed with brine, dried over Na<sub>2</sub>SO<sub>4</sub>, filtered, and concentrated under reduced pressure. The residue was purified by flash column chromatography (silica gel, 20% EtOAc/hexanes) to give an olefin (2.69 g) as a colorless oil.

To a solution of the above olefin (2.69 g) in DMF (65 mL) were added imidazole (1.78 g 26.2 mmol) and TBSCl (2.95 g, 19.6 mmol), and the resultant solution was stirred at room temperature for 11.5 h. The reaction mixture was quenched with saturated aqueous NH<sub>4</sub>Cl solution. The mixture was extracted with Et<sub>2</sub>O, and the organic layer was washed with H<sub>2</sub>O and brine, dried over MgSO<sub>4</sub>, filtered and concentrated under reduced pressure. The residue was purified by flash column chromatography (silica gel, 0 to 15% EtOAc/hexanes) to give a TBS ether (4.19 g) as a colorless oil.

Ozone was bubbled through a solution of the above TBS ether (4.19 g) in CH<sub>2</sub>Cl<sub>2</sub> (65 mL) at -78 °C until a pale blue color was persisted. Oxygen was bubbled

through the solution to remove excess ozone. To the solution was then added triphenylphosphine (13.78 g, 52.5 mmol), and the reaction mixture was gradually allowed to warm to room temperature and stirred for 15 h. The mixture was concentrated under reduced pressure. The residue was purified by flash column chromatography (silica gel, 0 to 15% EtOAc/hexanes) to give aldehyde **26** (2.91 g, 69% for the three steps) as a colorless oil:  $[\alpha]_D^{20} -16.1$  ( $c$  1.01,  $\text{CHCl}_3$ ); IR (film) 2953, 2928, 2893, 2856, 2717, 1726, 1472, 1362, 1254, 1099, 1041, 836, 776, 698  $\text{cm}^{-1}$ ;  $^1\text{H}$  NMR (600 MHz,  $\text{CDCl}_3$ )  $\delta$  9.75 (dd,  $J = 1.7, 1.7$  Hz, 1H), 7.34—7.30 (m, 4H), 7.27 (m, 1H), 4.51 (d,  $J = 12.0$  Hz, 1H), 4.48 (d,  $J = 12.0$  Hz, 1H), 3.88 (m, 1H), 3.40 (dd,  $J = 9.6, 5.5$  Hz, 1H), 3.33 (dd,  $J = 9.6, 6.2$  Hz, 1H), 2.49—2.46 (m, 2H), 1.94 (dddd,  $J = 14.5, 8.3, 7.2, 4.5$  Hz, 1H), 1.78 (dddd,  $J = 14.5, 6.9, 6.9, 6.9$  Hz, 1H), 0.86 (s, 9H), 0.033 (s, 3H), 0.028 (s, 3H);  $^{13}\text{C}$  NMR (150 MHz,  $\text{CDCl}_3$ )  $\delta$  202.5, 138.1, 128.3 ( $\times 2$ ), 127.59 ( $\times 2$ ), 127.57, 73.9, 73.3, 70.1, 39.4, 26.9, 25.8 ( $\times 3$ ), 18.0, -4.5, -4.9; HRMS (ESI) calcd for  $\text{C}_{18}\text{H}_{30}\text{O}_3\text{SiNa}$   $[(\text{M} + \text{Na})^+]$  345.1856, found 345.1858.

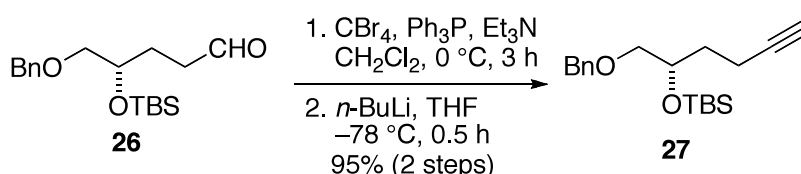

**Alkyne 27.** To a solution of  $\text{CBr}_4$  (1.29 g, 3.89 mmol) in  $\text{CH}_2\text{Cl}_2$  (10 mL) at  $0^\circ\text{C}$  was added  $\text{Ph}_3\text{P}$  (2.02 g, 7.70 mmol), and the resultant solution was stirred at  $0^\circ\text{C}$  for 30 min. To the solution were added  $\text{Et}_3\text{N}$  (1.45 mL, 10.4 mmol) and a solution of aldehyde **26** (0.540 g, 1.67 mmol) in  $\text{CH}_2\text{Cl}_2$  (7 mL), and the resultant solution was stirred at  $0^\circ\text{C}$  for 3 h. The reaction mixture was quenched with saturated aqueous  $\text{NH}_4\text{Cl}$  solution. The mixture was extracted with EtOAc, and the organic layer was washed with saturated aqueous  $\text{NaHCO}_3$  solution and brine, dried over  $\text{Na}_2\text{SO}_4$ , filtered, and concentrated



under reduced pressure. The residue was purified by flash column chromatography (silica gel, 0 to 5% EtOAc/hexanes) to give a dibromoolefin (0.77 g), which was contaminated with some impurities and used for the next reaction without further purification.

To a solution of the above dibromoolefin (0.77 g) in THF (16 mL) at  $-78\text{ }^{\circ}\text{C}$  was added *n*-BuLi (2.69 M solution in hexanes, 1.50 mL, 4.04 mmol), and the resultant solution was stirred at  $-78\text{ }^{\circ}\text{C}$  for 30 min. The reaction mixture was quenched with saturated aqueous  $\text{NH}_4\text{Cl}$  solution. The mixture was extracted with EtOAc, and the organic layer was washed with  $\text{H}_2\text{O}$  and brine, dried over  $\text{Na}_2\text{SO}_4$ , filtered, and concentrated under reduced pressure. The residue was purified by flash column chromatography (silica gel, 0 to 5% EtOAc/hexanes) to give alkyne **27** (0.51 g, 95% for the two steps) as a yellow oil:  $[\alpha]_{\text{D}}^{20} -20.1$  ( $c$  1.37,  $\text{CHCl}_3$ ); IR (film) 3310, 2954, 2928, 2894, 2856, 1471, 1362, 1254, 1127, 1093, 1029, 999, 836, 777, 735, 697,  $633\text{ cm}^{-1}$ ;  $^1\text{H}$  NMR (600 MHz,  $\text{CDCl}_3$ )  $\delta$  7.34—7.31 (m, 4H), 7.26 (m, 1H), 4.52 (d,  $J = 12.4\text{ Hz}$ , 1H), 4.50 (d,  $J = 12.4\text{ Hz}$ , 1H), 3.95 (dddd,  $J = 8.2, 5.5, 5.5, 4.1\text{ Hz}$ , 1H), 3.41 (dd,  $J = 9.6, 5.5\text{ Hz}$ , 1H), 3.35 (dd,  $J = 9.6, 5.5\text{ Hz}$ , 1H), 2.27—2.23 (m, 2H), 1.92 (dd,  $J = 2.8, 2.8\text{ Hz}$ , 1H), 1.79 (dddd,  $J = 13.7, 7.6, 7.6, 4.1\text{ Hz}$ , 1H), 1.66 (dddd,  $J = 13.7, 8.2, 7.3, 6.2\text{ Hz}$ , 1H), 0.89 (s, 9H) 0.07 (s, 3H), 0.04 (s, 3H);  $^{13}\text{C}$  NMR (150 MHz,  $\text{CDCl}_3$ )  $\delta$  138.3, 128.3 ( $\times 2$ ), 127.6 ( $\times 2$ ), 127.5, 84.4, 74.4, 73.3, 69.9, 68.4, 33.4, 25.9 ( $\times 3$ ), 18.1, 14.4,  $-4.4$ ,  $-4.9$ ; HRMS (ESI) calcd for  $\text{C}_{19}\text{H}_{30}\text{O}_2\text{SiNa}$   $[(\text{M} + \text{Na})^+]$  341.1907, found 341.1912.

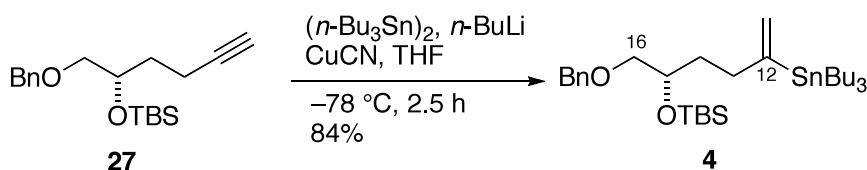

**Vinylstannane 4.** To a solution of bis(tri-*n*-butyltin) (3.00 mL, 6.00 mmol) in THF (7.0 mL) at  $-40\text{ }^{\circ}\text{C}$  was added *n*-BuLi (2.69 M solution in hexanes, 2.20 mL, 5.92 mmol), and the resultant solution was stirred at  $-40\text{ }^{\circ}\text{C}$  for 1 h. To the solution was added copper(I) cyanide (265.7 mg, 2.97 mmol), and the reaction mixture was cooled to  $-78\text{ }^{\circ}\text{C}$ . To the resultant suspension was added a solution of alkyne **27** (308.2 mg 0.9676 mmol) in THF (2.0 mL + 1.0 mL rinse), and the resultant mixture was stirred at  $-78\text{ }^{\circ}\text{C}$  for 2.5 h. The reaction mixture was quenched with  $\text{H}_2\text{O}$ . The mixture was extracted with  $\text{Et}_2\text{O}$ , and the organic layer was washed with saturated aqueous KF solution and brine, dried over  $\text{Na}_2\text{SO}_4$ , filtered, and concentrated under reduced pressure. The residue was purified by flash column chromatography (silica gel, 0 to 5% benzene/hexanes) to give vinylstannane **4** (494.5 mg, 84%) as a colorless oil:  $[\alpha]_{\text{D}}^{24} -1.7$  ( $c$  1.00,  $\text{CH}_2\text{Cl}_2$ ); IR (film) 2955, 2927, 2854, 1457, 1253, 1115, 1003, 911, 835, 775, 696  $\text{cm}^{-1}$ ;  $^1\text{H}$  NMR (600 MHz,  $\text{C}_6\text{D}_6$ )  $\delta$  7.28—7.27 (m, 2H), 7.20—7.17 (m, 2H), 7.09 (m, 1H), 5.89 (br s, 1H), 5.31 (br s, 1H) 4.35 (br d,  $J = 12.4\text{ Hz}$ , 1H), 4.32 (br d,  $J = 12.4\text{ Hz}$ , 1H), 3.92 (m, 1H), 3.40 (m, 1H), 3.34 (m, 1H), 2.61 (m, 1H), 2.44 (m, 1H), 1.85—1.71 (m, 2H), 1.68—1.55 (m, 6H), 1.42—1.35 (m, 6H), 1.05—1.01 (m, 15H), 0.95—0.92 (m, 9H), 0.14—0.12 (m, 6H);  $^{13}\text{C}$  NMR (150 MHz,  $\text{C}_6\text{D}_6$ )  $\delta$  155.2, 139.0, 128.5 ( $\times 2$ ), 127.8 ( $\times 2$ ), 127.7, 125.2, 75.2, 73.4, 71.8, 37.5, 35.4, 29.6 ( $\times 3$ ), 27.8 ( $\times 3$ ), 26.2 ( $\times 3$ ), 18.4, 13.9 ( $\times 3$ ), 9.9 ( $\times 3$ ),  $-4.0$ ,  $-4.5$ ; HRMS (ESI) calcd for  $\text{C}_{31}\text{H}_{58}\text{O}_2\text{SiSnNa}$   $[(\text{M} + \text{Na})^+]$  633.3120, found 633.3113.

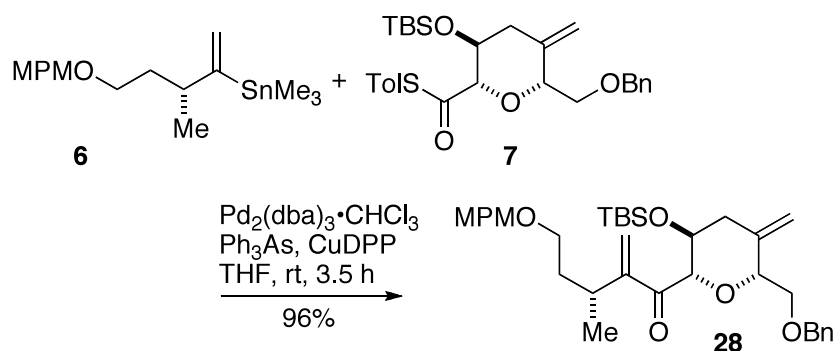

**Enone 28.** To a solution of thioester **7** (26.0 mg, 0.0521 mmol), copper(I) diphenylphosphinate (29.3 mg, 0.104 mmol), and  $\text{Pd}_2(\text{dba})_3 \cdot \text{CHCl}_3$  (2.70 mg, 0.00261 mmol) in THF (0.25 mL) were added a solution of  $\text{Ph}_3\text{As}$  (6.40 mg, 0.0209 mmol) in THF (0.1 mL + 0.05 mL rinse) and a solution of vinylstannane **6** (21.7 mg, 0.0566 mmol) in THF (0.1 mL + 0.05 mL rinse). The resultant solution was stirred at room temperature for 3.5 h. The reaction mixture was diluted with  $\text{Et}_2\text{O}$ . Insoluble materials were filtered off, and the filtrate was concentrated under reduced pressure. The residue was purified by flash column chromatography (silica gel, 0 to 10 %  $\text{EtOAc}$ /hexanes) to give enone **28** (29.8 mg, 96%) as a colorless oil:  $[\alpha]_{\text{D}}^{30} +8.7$  ( $c$  1.00,  $\text{CHCl}_3$ ); IR (film) 2954, 2928, 2855, 1645, 1613, 1514, 1249, 1098, 837, 778  $\text{cm}^{-1}$ ;  $^1\text{H}$  NMR (600 MHz,  $\text{CDCl}_3$ )  $\delta$  7.31—7.26 (m, 3H), 7.26—7.21 (m, 4H), 6.85—6.82 (m, 2H), 6.23 (s, 1H), 5.85 (s, 1H), 4.90 (d,  $J = 0.7$  Hz, 1H), 4.84 (d,  $J = 0.7$  Hz, 1H), 4.56 (d,  $J = 12.0$  Hz, 1H), 4.50 (d,  $J = 12.0$  Hz, 1H), 4.37 (d,  $J = 11.7$  Hz, 1H), 4.36 (d,  $J = 8.6$  Hz, 1H), 4.33 (d,  $J = 11.7$  Hz, 1H), 4.06 (br dd,  $J = 6.2, 5.2$  Hz, 1H), 4.02 (ddd,  $J = 9.6, 8.6, 5.2$  Hz, 1H), 3.77 (dd,  $J = 10.3, 5.2$  Hz, 1H), 3.77 (s, 3H), 3.62 (dd,  $J = 10.3, 6.2$  Hz, 1H), 3.41 (ddd,  $J = 13.7, 7.2, 6.9$  Hz, 1H), 3.40 (ddd,  $J = 13.7, 7.2, 6.8$  Hz, 1H), 2.92 (ddq,  $J = 6.8, 6.8, 6.8$  Hz, 1H), 2.66 (dd,  $J = 13.1, 5.2$  Hz, 1H), 2.27 (m, 1H), 1.79 (dddd,  $J = 13.7, 6.9, 6.8, 6.8$  Hz, 1H), 1.61 (dddd,  $J = 13.7, 7.2, 7.2, 6.8$  Hz, 1H), 1.04 (d,  $J = 6.8$  Hz, 3H),

0.79 (s, 9H), 0.04 (s, 3H), -0.07 (s, 3H);  $^{13}\text{C}$  NMR (150 MHz,  $\text{CDCl}_3$ )  $\delta$  196.9, 159.0, 153.1, 141.3, 138.0, 130.7, 129.3 ( $\times 2$ ), 128.34, 128.31, 127.7 ( $\times 2$ ), 127.6, 125.4, 113.7 ( $\times 2$ ), 110.2, 80.6, 77.5, 73.5, 72.4, 70.2, 69.1, 68.3, 55.2, 42.5, 36.0, 30.3, 25.7 ( $\times 3$ ), 20.1, 17.8, -4.5, -5.0; HRMS (ESI) calcd for  $\text{C}_{35}\text{H}_{50}\text{O}_6\text{SiNa}$   $[(\text{M} + \text{Na})^+]$  617.3269, found 617.3290.

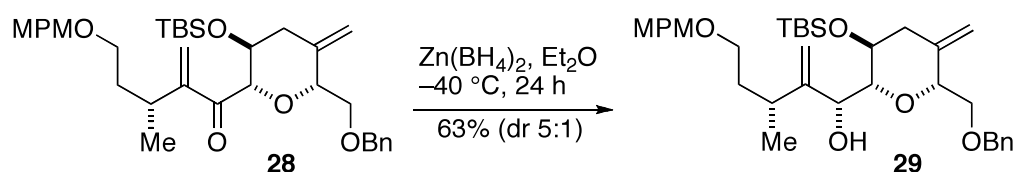

**Allylic alcohol 29.** To a solution of enone **28** (12.1 mg, 0.0203 mmol) in  $\text{Et}_2\text{O}$  (0.4 mL) at  $-40\text{ }^\circ\text{C}$  was added  $\text{Zn(BH}_4)_2$  (0.132 M solution in  $\text{Et}_2\text{O}$ , 0.775 mL, 0.102 mmol), and the resultant solution was stirred at  $-40\text{ }^\circ\text{C}$  for 12 h. To this mixture was added  $\text{Zn(BH}_4)_2$  (0.132 M solution in  $\text{Et}_2\text{O}$ , 0.775 mL, 0.102 mmol), and the resultant solution was stirred at  $-40\text{ }^\circ\text{C}$  for 12 h. The reaction mixture was quenched with saturated aqueous  $\text{NH}_4\text{Cl}$  solution. The mixture was extracted with  $\text{Et}_2\text{O}$ , and the organic layer was washed with brine, dried over  $\text{MgSO}_4$ , filtered, and concentrated under reduced pressure. Purification of the residue by column chromatography (silica gel, 0 to 20%  $\text{EtOAc/hexanes}$ ) gave allylic alcohol **29** (7.6 mg, 63%, dr = 5 : 1 by 600 MHz  $^1\text{H}$  NMR analysis) as a colorless oil:  $[\alpha]_{\text{D}}^{30} -2.19$  ( $c$  1.00,  $\text{CHCl}_3$ ); IR (film) 3441, 2953, 2927, 2856, 1513, 1249, 1094, 836  $\text{cm}^{-1}$ ;  $^1\text{H}$  NMR (600 MHz,  $\text{CDCl}_3$ )  $\delta$  7.32—7.29 (m, 4H), 7.27—7.21 (m, 3H), 6.85—6.82 (m, 2H), 5.12 (s, 1H), 4.99 (s, 1H), 4.85 (s, 1H), 4.83 (s, 1H), 4.54 (d,  $J = 12.4$  Hz, 1H), 4.51 (d,  $J = 12.4$  Hz, 1H), 4.42 (d,  $J = 11.6$  Hz, 1H), 4.35 (d,  $J = 11.6$  Hz, 1H), 4.24 (d,  $J = 5.9$  Hz, 1H), 3.98 (dd,  $J = 5.8, 4.8$  Hz, 1H), 3.78—3.74 (m, 4H), 3.68 (dd,  $J = 10.0, 4.8$  Hz, 1H), 3.58 (dd,  $J = 10.1, 5.8$  Hz, 1H), 3.49—3.46 (m, 2H), 3.38 (dd,  $J = 7.9, 5.9$  Hz, 1H), 2.59 (dd,  $J = 13.4, 4.8$  Hz, 1H), 2.47

(ddq,  $J = 6.9, 6.9, 6.9$  Hz, 1H), 2.25 (dd,  $J = 13.4, 8.9$  Hz, 1H), 1.80 (dddd,  $J = 13.7, 7.6, 7.6, 6.9$  Hz, 1H), 1.66 (dddd,  $J = 13.7, 6.9, 6.9, 6.9$  Hz, 1H), 1.02 (d,  $J = 6.9$  Hz, 3H), 0.88 (s, 9H), 0.10 (s, 3H), 0.09 (s, 3H) (one proton missing presumably due to H/D exchange);  $^{13}\text{C}$  NMR (150 MHz,  $\text{CDCl}_3$ )  $\delta$  159.1, 154.1, 142.1, 138.2, 130.6, 129.3 ( $\times 2$ ), 128.3 ( $\times 2$ ), 127.6 ( $\times 2$ ), 127.5, 113.7 ( $\times 2$ ), 112.0, 109.7, 83.4, 76.90, 76.89, 73.4, 72.3, 71.6, 70.5, 68.6, 55.2, 42.2, 37.3, 31.6, 25.8 ( $\times 3$ ), 21.7, 17.9,  $-3.5, -4.6$ ; HRMS (ESI) calcd for  $\text{C}_{35}\text{H}_{52}\text{O}_6\text{SiNa}$   $[(\text{M} + \text{Na})^+]$  619.3425, found 619.3410.

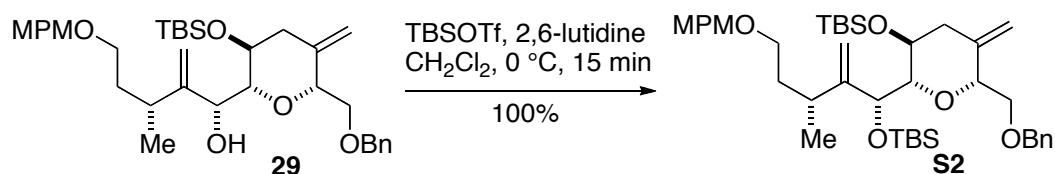

**Bis-TBS ether S2.** To a solution of allylic alcohol **29** (45.9 mg, 0.0769 mmol) in  $\text{CH}_2\text{Cl}_2$  (0.8 mL) at  $0\text{ }^\circ\text{C}$  were added 2,6-lutidine (0.0500 mL, 0.429 mmol) and TBSOTf (0.0500 mL, 0.218 mmol), and the resultant solution was stirred at  $0\text{ }^\circ\text{C}$  for 15 min. The reaction mixture was quenched with saturated aqueous  $\text{NH}_4\text{Cl}$  solution. The mixture was extracted with EtOAc, and the organic layer was washed with brine, dried over  $\text{Na}_2\text{SO}_4$ , filtered, and concentrated under reduced pressure. Purification of the residue by flash column chromatography (silica gel, 0 to 5%  $\text{Et}_2\text{O}$ /hexanes) gave bis-TBS ether **S2** (54.8 mg, 100%) as a colorless oil:  $[\alpha]_{\text{D}}^{30} -7.7$  ( $c$  0.69,  $\text{CHCl}_3$ ); IR (film) 2954, 2927, 2885, 2855, 1514, 1471, 1457, 1361, 1249, 1093, 835,  $775\text{ cm}^{-1}$ ;  $^1\text{H}$  NMR (600 MHz,  $\text{CDCl}_3$ )  $\delta$  7.35—7.30 (m, 4H), 7.27—7.22 (m, 3H), 6.86—6.83 (m, 2H), 5.14 (s, 1H), 4.93 (s, 1H), 4.77 (s, 2H), 4.63 (d,  $J = 12.4$  Hz, 1H), 4.56 (d,  $J = 12.4$  Hz, 1H), 4.41 (d,  $J = 11.3$  Hz, 1H), 4.35 (d,  $J = 11.3$  Hz, 1H), 4.34 (s, 1H), 4.18 (m, 1H), 4.01 (dd,  $J = 9.3, 4.4$  Hz, 1H), 3.77 (s, 3H), 3.69 (dd,  $J = 10.6, 3.8$  Hz, 1H), 3.57 (dd,  $J = 10.6, 7.2$  Hz, 1H), 3.43 (m, 3H), 2.53 (dd,  $J = 13.4, 2.4$  Hz, 1H), 2.27 (m, 1H), 2.17

(dd,  $J = 13.4, 5.5$  Hz, 1H), 1.87 (dddd,  $J = 13.4, 6.8, 6.8, 5.8$  Hz, 1H), 1.59 (dddd,  $J = 13.4, 8.9, 7.6, 5.8$  Hz, 1H), 1.01 (d,  $J = 6.8$  Hz, 3H), 0.88 (s, 9H), 0.83 (s, 9H), 0.05 (s, 3H), 0.03 (s, 3H), 0.01 (s, 3H),  $-0.02$  (s, 3H);  $^{13}\text{C}$  NMR (150 MHz,  $\text{CDCl}_3$ )  $\delta$  158.0, 154.6, 143.5, 138.5, 130.9, 129.1 ( $\times 2$ ), 128.3 ( $\times 2$ ), 127.6 ( $\times 2$ ), 127.5, 113.7, 109.9, 108.6, 84.3, 76.5, 75.9, 73.5, 72.42, 72.37, 68.9, 66.7, 55.2, 39.7, 36.4, 32.0, 29.7, 25.9 ( $\times 3$ ), 25.9 ( $\times 3$ ), 21.5, 18.3, 17.9,  $-3.6$ ,  $-4.4$ ,  $-4.7$ ,  $-4.8$ ; HRMS (ESI) calcd for  $\text{C}_{41}\text{H}_{66}\text{O}_6\text{Si}_2\text{Na}$   $[(\text{M} + \text{Na})^+]$  733.4290, found 733.4283.

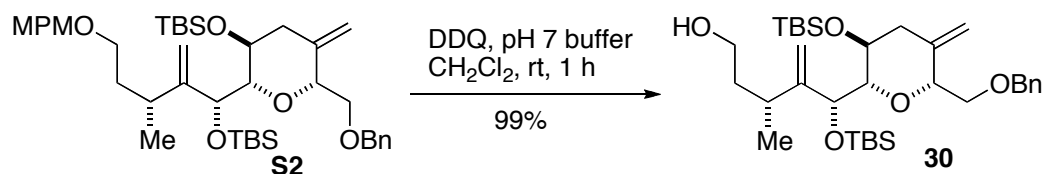

**Alcohol 30.** To a solution of bis-TBS ether **S2** (50.1 mg, 0.0705 mmol) in  $\text{CH}_2\text{Cl}_2/\text{pH } 7$  buffer (10:1, v/v, 0.77 mL) at  $0^\circ\text{C}$  was added DDQ (17.7 mg, 0.0780 mmol), and the resultant solution was allowed to warm to room temperature and stirred for 1 h. The reaction mixture was cooled to  $0^\circ\text{C}$  and quenched with saturated aqueous  $\text{NaHCO}_3$  solution. The mixture was extracted with EtOAc, and the organic layer was washed with brine, dried over  $\text{Na}_2\text{SO}_4$ , filtered, and concentrated under reduced pressure. Purification of the residue by flash column chromatography (silica gel, 0 to 10% EtOAc/hexanes) gave alcohol **30** (41.1 mg, 99%) as a colorless oil:  $[\alpha]_{\text{D}}^{30} -15.3$  ( $c$  1.00,  $\text{CHCl}_3$ ); IR (film) 3446, 3066, 3031, 2955, 2928, 2885, 2856, 1653, 1472, 1462, 1362, 1254, 1088, 836, 775, 697  $\text{cm}^{-1}$ ;  $^1\text{H}$  NMR (600 MHz,  $\text{CDCl}_3$ )  $\delta$  7.35—7.31 (m, 4H), 7.27—7.24 (m, 1H), 5.14 (s, 1H), 4.95 (s, 1H), 4.79 (s, 1H), 4.78 (s, 1H), 4.62 (d,  $J = 12.4$  Hz, 1H), 4.56 (d,  $J = 12.4$  Hz, 1H), 4.41 (s, 1H), 4.09 (br dd,  $J = 8.9, 4.5$  Hz, 1H), 3.85 (ddd,  $J = 6.9, 6.2, 3.4$  Hz, 1H), 3.71 (dd,  $J = 10.7, 4.5$  Hz, 1H), 3.63 (ddd,  $J = 10.7, 7.2, 5.9$  Hz, 1H), 3.59 (dd,  $J = 10.7, 8.9$  Hz, 1H), 3.54 (ddd,  $J = 10.7, 5.8, 5.8$  Hz, 1H), 3.42 (dd,  $J =$

6.2, 2.0 Hz, 1H), 2.55 (dd,  $J = 13.4, 3.4$  Hz, 1H), 2.47 (ddq,  $J = 6.9, 6.9, 6.9$  Hz, 1H), 2.18 (dd,  $J = 13.4, 6.9$  Hz, 1H), 1.68 (dddd,  $J = 13.7, 6.9, 5.9, 5.8$  Hz, 1H), 1.61 (dddd,  $J = 13.7, 7.2, 6.9, 5.8$  Hz, 1H), 1.00 (d,  $J = 6.9$  Hz, 3H), 0.90 (s, 9H), 0.85 (s, 9H), 0.08 (s, 3H), 0.053 (s, 3H), 0.051 (s, 3H), 0.01 (s, 3H) (one proton missing presumably due to H/D exchange);  $^{13}\text{C}$  NMR (150 MHz,  $\text{CDCl}_3$ )  $\delta$  154.0, 142.9, 138.3, 128.3 ( $\times 2$ ), 127.7 ( $\times 2$ ), 127.5, 111.2, 109.0, 85.1, 76.7, 76.3, 73.5, 71.7, 67.8, 60.8, 40.7, 40.0, 30.7, 26.0 ( $\times 3$ ), 25.8 ( $\times 3$ ), 22.2, 18.4, 17.9,  $-3.5$ ,  $-4.4$ ,  $-4.5$ ,  $-4.7$ ; HRMS (ESI) calcd for  $\text{C}_{33}\text{H}_{58}\text{O}_5\text{Si}_2\text{Na}$   $[(\text{M} + \text{Na})^+]$  613.3715, found 613.3738.

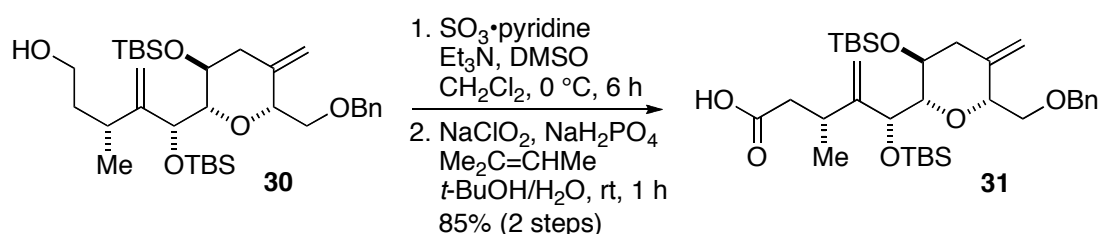

**Carboxylic acid 31.** To a solution of alcohol **30** (29.9 mg, 0.0506 mmol) in  $\text{CH}_2\text{Cl}_2/\text{DMSO}$  (1/1, v/v, 0.6 mL) was added  $\text{Et}_3\text{N}$  (0.0400 mL, 0.287 mmol). To the reaction mixture cooled to  $0\text{ }^\circ\text{C}$  was added  $\text{SO}_3 \cdot \text{pyridine}$  (32.4 mg, 0.204 mmol), and the resultant solution was stirred at  $0\text{ }^\circ\text{C}$  for 2 h. To the reaction mixture were added  $\text{Et}_3\text{N}$  (0.0700 mL, 0.502 mmol) and  $\text{SO}_3 \cdot \text{pyridine}$  (56.5 mg, 0.355 mmol) in two portions within 1 h, and the resultant solution was stirred at  $0\text{ }^\circ\text{C}$  for 3 h. The reaction mixture was diluted with  $\text{Et}_2\text{O}$ , washed successively with 1 M aqueous HCl solution, saturated aqueous  $\text{NaHCO}_3$  solution, and brine, dried over  $\text{MgSO}_4$ , filtered, and concentrated under reduced pressure. Purification of the residue by flash column chromatography (silica gel, 0 to 10%  $\text{EtOAc}/\text{hexanes}$ ) gave aldehyde (26.9 mg, 90%) as a colorless oil, which was used immediately in the next reaction.

To a solution of the above aldehyde (26.9 mg, 0.0457 mmol), 2-methyl-2-butene

(0.0485 mL, 0.458 mmol), and NaH<sub>2</sub>PO<sub>4</sub> (6.10 mg, 0.0508 mmol) in *t*-BuOH/H<sub>2</sub>O (5:1, v/v, 0.48 mL) at 0 °C was added NaClO<sub>2</sub> (79% purity, 12.4 mg, 0.137 mmol), and the resultant solution was stirred at room temperature for 1 h. The reaction mixture was poured into CHCl<sub>3</sub>/H<sub>2</sub>O. The aqueous layer was acidified (pH 3) with 1 M aqueous HCl solution, and the organic layer was separated. The aqueous layer was extracted with CHCl<sub>3</sub>. The combined organic layer was washed with brine, dried over Na<sub>2</sub>SO<sub>4</sub>, filtered, and concentrated under reduced pressure. Purification of the residue by flash column chromatography (silica gel, 0 to 20% EtOAc/hexanes) gave carboxylic acid **31** (26.0 mg, 94%) as a colorless oil:  $[\alpha]_D^{26}$  -11.3 (*c* 1.50, CHCl<sub>3</sub>); IR (film) 3503, 3087, 3033, 2955, 2929, 2895, 2857, 1710, 1652, 1471, 1463, 1254, 1094, 836, 775 cm<sup>-1</sup>; <sup>1</sup>H NMR (600 MHz, CDCl<sub>3</sub>)  $\delta$  7.34—7.30 (m, 4H), 7.27—7.24 (m, 1H), 5.14 (s, 1H), 4.95 (s, 1H), 4.78 (s, 1H), 4.76 (s, 1H), 4.64 (d, *J* = 12.0 Hz, 1H), 4.55 (d, *J* = 12.0 Hz, 1H), 4.42 (s, 1H), 4.14 (dd, *J* = 6.8, 3.8 Hz, 1H), 3.85 (ddd, *J* = 6.5, 5.8, 3.4 Hz, 1H), 3.72 (dd, *J* = 10.6, 3.8 Hz, 1H), 3.58 (dd, *J* = 10.6, 6.8 Hz, 1H), 3.42 (dd, *J* = 5.8, 2.0 Hz, 1H), 2.85 (m, 1H), 2.64 (dd, *J* = 15.1, 3.4 Hz, 1H), 2.53 (dd, *J* = 13.4, 3.4 Hz, 1H), 2.25 (dd, *J* = 15.1, 11.0 Hz, 1H), 2.18 (dd, *J* = 13.4, 6.5 Hz, 1H), 1.09 (d, *J* = 6.8 Hz, 3H), 0.88 (s, 9H), 0.83 (s, 9H), 0.06 (s, 3H), 0.03 (s, 3H), 0.02 (s, 3H), -0.01 (s, 3H) (one proton missing presumably due to H/D exchange); <sup>13</sup>C NMR (150 MHz, CDCl<sub>3</sub>)  $\delta$  177.5, 153.0, 142.9, 138.3, 128.3 ( $\times$  2), 127.7 ( $\times$  2), 127.5, 111.4, 109.0, 84.9, 75.9, 73.6, 73.4, 72.0, 67.3, 41.9, 40.4, 31.4, 25.9 ( $\times$  3), 25.8 ( $\times$  3), 20.6, 18.3, 17.9, -3.5, -4.4, -4.7, -4.8; HRMS (ESI) calcd for C<sub>33</sub>H<sub>56</sub>O<sub>6</sub>Si<sub>2</sub>Na [(M + Na)<sup>+</sup>] 627.3508, found 627.3517.

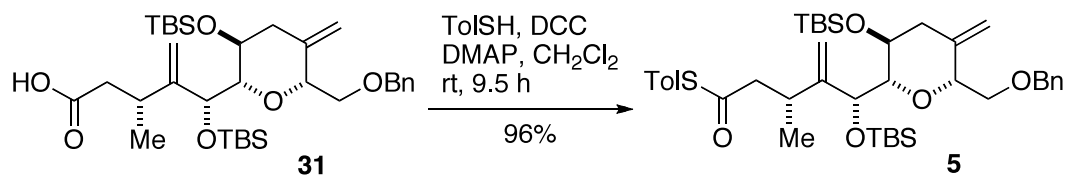



**Thioester 5.** To a solution of carboxylic acid **31** (22.0 mg, 0.0364 mmol) in CH<sub>2</sub>Cl<sub>2</sub> (1 mL) at 0 °C were added *p*-toluenethiol (5.00 mg, 0.0403 mmol), DMAP (0.460 mg, 0.00377 mmol), and DCC (8.30 mg, 0.0402 mmol), and the resultant solution was stirred at room temperature for 9.5 h. The reaction mixture was diluted with Et<sub>2</sub>O. Insoluble materials were filtered off, and the filtrate was washed with H<sub>2</sub>O and brine. The organic layer was dried over MgSO<sub>4</sub>, filtered and concentrated under reduce pressure. Purification of the residue by flash column chromatography (silica gel, 0 to 2.5% EtOAc/hexanes) gave thioester **5** (24.9 mg, 96%) as a colorless oil:  $[\alpha]_D^{25} -8.5$  (*c* 1.12, CHCl<sub>3</sub>); IR (film) 3077, 3030, 2955, 2928, 2896, 2856, 2033, 1709, 1471, 1462, 1255, 1094, 836, 806, 775 cm<sup>-1</sup>; <sup>1</sup>H NMR (600 MHz, CDCl<sub>3</sub>)  $\delta$  7.35—7.29 (m, 4H), 7.25—7.22 (m, 3H), 7.19—7.18 (m, 2H) 5.15 (s, 1H), 4.95 (s, 1H), 4.79 (s, 2H), 4.66 (d, *J* = 12.0 Hz, 1H), 4.55 (d, *J* = 12.0 Hz, 1H), 4.41 (s, 1H), 4.15 (dd, *J* = 6.9, 4.1 Hz, 1H), 3.88 (m, 1H), 3.72 (dd, *J* = 10.7, 4.1 Hz, 1H), 3.60 (dd, *J* = 10.7, 6.9 Hz, 1H), 3.42 (dd, *J* = 5.9, 1.7 Hz, 1H), 2.95—2.90 (m, 2H), 2.56 (dd, *J* = 15.4, 11.6 Hz, 1H), 2.54 (dd, *J* = 13.7, 4.4 Hz, 1H), 2.35 (s, 3H), 2.19 (dd, *J* = 13.7, 6.5 Hz, 1H), 1.10 (d, *J* = 6.8 Hz, 3H), 0.90 (s, 9H), 0.86 (s, 9H), 0.07 (s, 3H), 0.05 (s, 3H), 0.04 (s, 3H), 0.01 (s, 3H); <sup>13</sup>C NMR (150 MHz, CDCl<sub>3</sub>)  $\delta$  196.8, 153.3, 143.1, 139.4, 138.5, 134.4 ( $\times$  2), 129.9 ( $\times$  2), 128.3 ( $\times$  2), 127.7 ( $\times$  2), 127.4, 124.5, 111.1, 108.9, 84.9, 76.8, 75.7, 73.6, 72.1, 67.2, 51.0, 40.3, 32.1, 25.93 ( $\times$  3), 25.86 ( $\times$  3), 21.3, 20.3, 18.3, 17.9, -3.5, -4.4, -4.7, -4.8; HRMS (ESI) calcd for C<sub>40</sub>H<sub>62</sub>O<sub>5</sub>Si<sub>2</sub>SNa [(M + Na)<sup>+</sup>] 733.3749, found 733.3755.

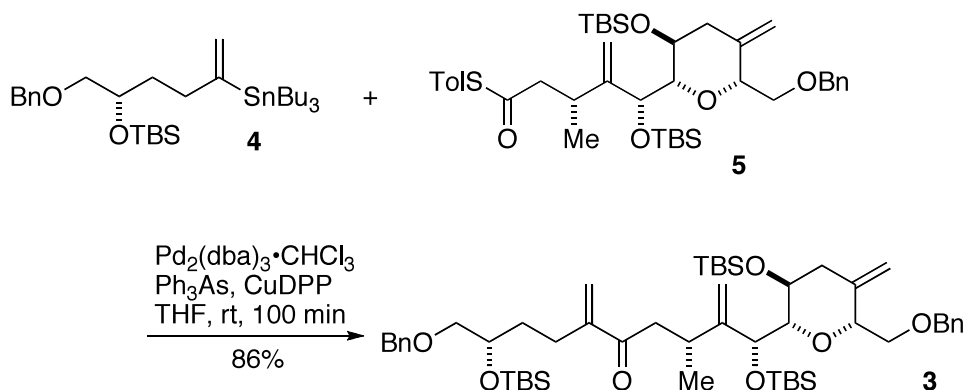

**Enone 3.** To a solution of thioester **5** (24.3 mg, 0.0342 mmol), copper(I) diphenylphosphinate (19.3 mg, 0.0688 mmol), and  $\text{Pd}_2(\text{dba})_3 \cdot \text{CHCl}_3$  (1.80 mg, 0.00174 mmol) in THF (0.2 mL) were added a solution of  $\text{Ph}_3\text{As}$  (4.20 mg, 0.0137 mmol) in THF (0.05 mL + 0.05 mL rinse) and a solution of vinylstannane **4** (23.0 mg, 0.0377 mmol) in THF (0.05 mL + 0.05 mL rinse), and the resultant solution was stirred at room temperature for 100 min. The reaction mixture was diluted with  $\text{Et}_2\text{O}$ . Insoluble materials were filtered off, and the filtrate was concentrated under reduced pressure. The residue was purified by flash column chromatography (silica gel, 0 to 2.5 %  $\text{EtOAc}$ /hexanes) to give enone **3** (26.6 mg, 86%) as a colorless oil:  $[\alpha]_{\text{D}}^{25} -3.8$  ( $c$  1.08,  $\text{CHCl}_3$ ); IR (film) 3088, 3065, 3031, 2954, 2928, 2894, 2856, 1682, 1471, 1462, 1362, 1254, 1094, 835, 775, 734, 697  $\text{cm}^{-1}$ ;  $^1\text{H}$  NMR (600 MHz,  $\text{CDCl}_3$ )  $\delta$  7.35—7.30 (m, 8H), 7.26—7.23 (m, 2H), 5.97 (s, 1H), 5.66 (s, 1H), 5.16 (s, 1H), 4.95 (s, 1H), 4.78 (s, 2H), 4.63 (d,  $J = 12.0$  Hz, 1H), 4.55 (d,  $J = 12.0$  Hz, 1H), 4.50 (s, 2H), 4.39 (s, 1H), 4.16 (dd,  $J = 6.9, 4.1$  Hz, 1H), 3.94 (m, 1H), 3.83 (m, 1H), 3.68 (dd,  $J = 10.7, 4.1$  Hz, 1H), 3.57 (dd,  $J = 10.7, 6.9$  Hz, 1H), 3.38 (m, 3H), 2.86 (dd,  $J = 15.8, 2.5$  Hz, 1H), 2.83 (m, 1H), 2.63 (dd,  $J = 15.8, 11.0$  Hz, 1H), 2.52 (dd,  $J = 13.4, 2.8$  Hz, 1H), 2.34 (ddd,  $J = 15.5, 11.7, 4.8$  Hz, 1H), 2.23 (ddd,  $J = 15.5, 11.3, 5.2$  Hz, 1H), 2.16 (dd,  $J = 13.4, 6.2$  Hz, 1H), 1.63 (m, 1H), 1.50 (dddd,  $J = 13.1, 11.7, 7.2, 5.2$  Hz, 1H), 0.97 (d,  $J = 6.5$  Hz,

3H), 0.87 (s, 18H), 0.80 (s, 9H), 0.04 (s, 6H), 0.03 (s, 6H), 0.01 (s, 3H), -0.03 (s, 3H);  $^{13}\text{C}$  NMR (150 MHz,  $\text{C}_6\text{D}_6$ )  $\delta$  199.8, 155.0, 149.9, 143.7, 139.4, 139.1, 128.52 ( $\times 2$ ), 128.47 ( $\times 2$ ), 127.81 ( $\times 2$ ), 127.76 ( $\times 2$ ), 127.7, 127.5, 123.0, 110.7, 109.1, 85.4, 77.3, 76.4, 75.1, 73.6, 73.4, 72.5, 71.9, 67.8, 45.4, 40.8, 34.3, 31.6, 27.5, 26.2 ( $\times 6$ ), 26.1 ( $\times 3$ ), 21.2, 18.6, 18.4, 18.1, -3.4, -4.0, -4.2, -4.4, -4.6 ( $\times 2$ ); HRMS (ESI) calcd for  $\text{C}_{52}\text{H}_{86}\text{O}_7\text{Si}_3\text{Na}$   $[(\text{M} + \text{Na})^+]$  929.5574, found 929.5605.

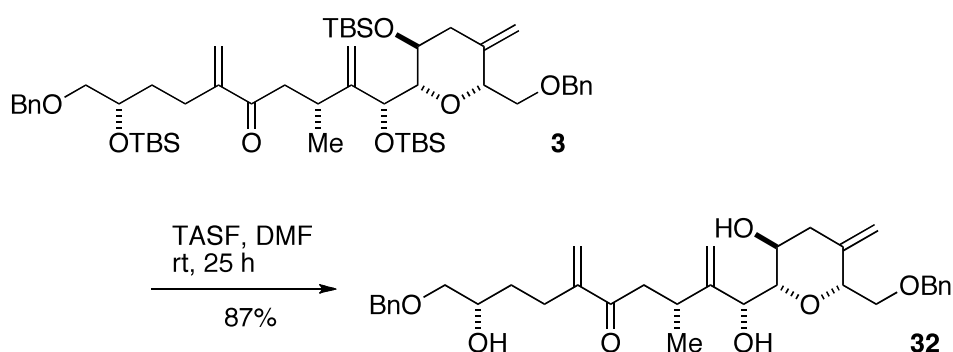

**Ketotriol 32.** To a solution of enone **3** (10.2 mg, 0.0112 mmol) in DMF (1.2 mL) at 0 °C was added TASF (117 mg, 0.425 mmol) in four portions, and the resultant solution was stirred at room temperature for 25 h. The reaction mixture was diluted with  $\text{Et}_2\text{O}$  and quenched with saturated aqueous  $\text{NaHCO}_3$  solution. The whole mixture was extracted with  $\text{Et}_2\text{O}$ , washed with brine, dried over  $\text{Na}_2\text{SO}_4$ , filtered and concentrated under reduced pressure. Purification by flash column chromatography (silica gel, 20 to 100%  $\text{EtOAc}$ /hexanes) gave ketotriol **32** (5.6 mg, 87%) as a colorless oil:  $[\alpha]_{\text{D}}^{25} +7.3$  ( $c$  0.20,  $\text{CH}_2\text{Cl}_2$ ); IR (film) 3405, 3087, 3064, 3030, 2924, 2863, 1665, 1454, 1094, 907, 738,  $698\text{ cm}^{-1}$ ;  $^1\text{H}$  NMR (600 MHz,  $\text{C}_6\text{D}_6$ )  $\delta$  7.29—7.28 (m, 2H), 7.21—7.15 (m, 6H), 7.12—7.08 (m, 2H), 5.52 (s, 1H), 5.42 (br s, 1H), 5.35 (s, 1H), 5.10 (s, 1H), 4.77 (m, 3H), 4.70 (d,  $J = 1.0\text{ Hz}$ , 1H), 4.39 (d,  $J = 12.4\text{ Hz}$ , 1H), 4.37 (d,  $J = 8.3\text{ Hz}$ , 1H), 4.34 (d,  $J = 12.4\text{ Hz}$ , 1H), 4.24 (s, 2H), 4.06 (ddd,  $J = 8.3, 7.2, 3.8\text{ Hz}$ , 1H), 3.99 (dd,  $J = 6.8,$

4.1 Hz, 1H), 3.69 (dd,  $J = 10.6, 4.1$  Hz, 1H), 3.65 (m, 1H), 3.57 (dd,  $J = 10.6, 6.8$  Hz, 1H), 3.46 (dd,  $J = 8.3, 8.3$  Hz, 1H), 3.17 (dd,  $J = 9.3, 3.8$  Hz, 1H), 3.13 (dd,  $J = 9.3, 7.2$  Hz, 1H), 2.86 (dd,  $J = 13.4, 5.5$  Hz, 1H), 2.80—2.70 (m, 2H), 2.48—2.41 (m, 2H), 2.35 (s, 1H), 2.33—2.26 (m, 2H), 1.49—1.40 (m, 2H), 1.00 (d,  $J = 6.5$  Hz, 3H);  $^{13}\text{C}$  NMR (150 MHz,  $\text{C}_6\text{D}_6$ )  $\delta$  202.8, 153.7, 148.8, 143.1, 139.3, 138.7, 128.6 ( $\times 2$ ), 128.4 ( $\times 2$ ), 128.3, 127.9 ( $\times 2$ ), 127.50 ( $\times 2$ ), 127.48, 125.1, 112.8, 109.0, 81.1, 80.4, 77.4, 74.8, 73.32, 73.30, 72.3, 70.9, 69.8, 45.6, 41.9, 32.5, 28.3, 27.3, 22.9; HRMS (ESI) calcd for  $\text{C}_{34}\text{H}_{44}\text{O}_7\text{Na}$   $[(\text{M} + \text{Na})^+]$  587.2979, found 587.2985.

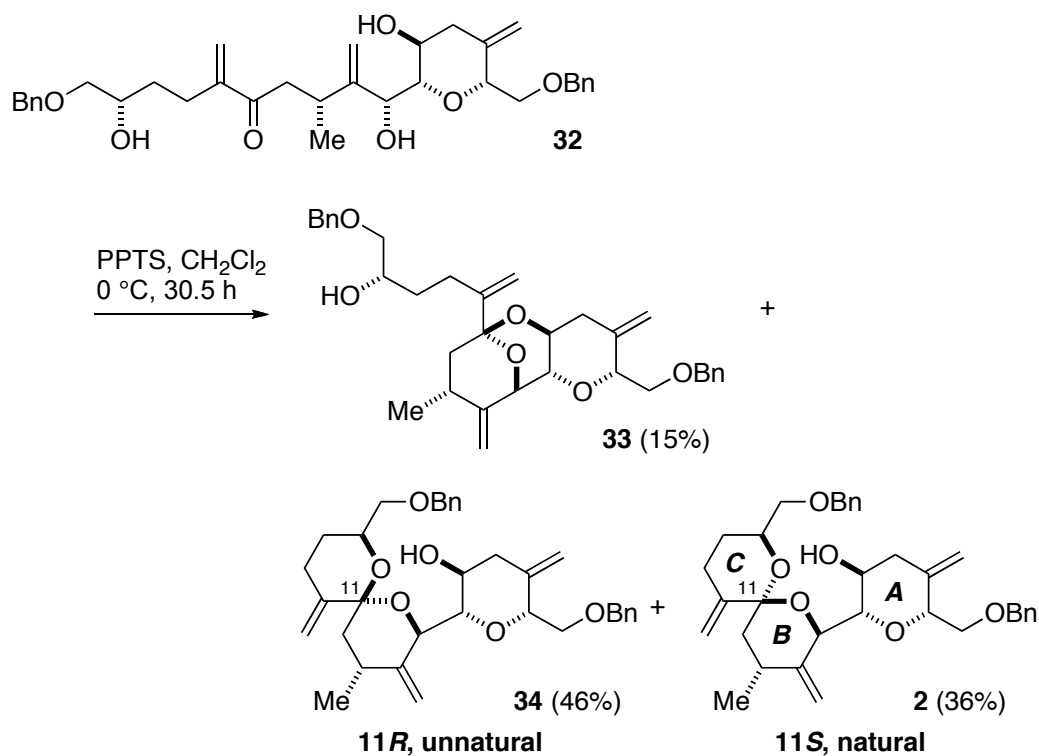

**Fused acetal 33 and spiroacetals 34 and 2.** To a solution of triol **32** (2.0 mg, 0.0035 mmol) in  $\text{CH}_2\text{Cl}_2$  (2.0 mL) at  $0\text{ }^\circ\text{C}$  was added a solution of PPTS (1.3 mg, 0.0053 mmol) in  $\text{CH}_2\text{Cl}_2$  (0.2 mL), and the resultant solution was stirred at  $0\text{ }^\circ\text{C}$  for 30.5 h. The reaction mixture was quenched with saturated aqueous  $\text{NaHCO}_3$  solution. The mixture was extracted with EtOAc, and the organic layer was washed with brine, dried over

Na<sub>2</sub>SO<sub>4</sub>, filtered, and concentrated under reduced pressure. Purification by flash column chromatography (silica gel, Et<sub>2</sub>O/CHCl<sub>3</sub>/hexanes = 1:1:3) gave a mixture of spiroacetals **2** and **34**, along with fused acetal **33**. Further purification of the mixture of spiroacetals **2** and **34** by reverse-phase HPLC [COSMOSIL 5C<sub>18</sub>-AR-II column, ø 10 × 250 mm, isocratic elution with 80% MeCN/H<sub>2</sub>O, flow rate 3.0 mL/min, UV 220 nm] gave spiroacetal **2** (0.7 mg, 36%, *t*<sub>R</sub> = 16 min, colorless oil) and spiroacetal **34** (0.9 mg, 46%, *t*<sub>R</sub> = 20 min, colorless oil). Further purification of fused acetal **33** by reverse-phase HPLC [COSMOSIL 5C<sub>18</sub>-AR-II column, ø 10 × 250 mm, isocratic elution with 80% MeCN/H<sub>2</sub>O, flow rate 3.0 mL/min, UV 220 nm] gave analytically pure fused acetal **33** (0.3 mg, 15%, *t*<sub>R</sub> = 16 min) as a colorless oil. Data for **2**: [α]<sub>D</sub><sup>24</sup> −26.1 (*c* 0.18, C<sub>6</sub>H<sub>6</sub>); <sup>1</sup>H NMR (600 MHz, C<sub>6</sub>D<sub>6</sub>) δ 7.31—7.30 (m, 3H), 7.22—7.17 (m, 5H), 7.12—7.08 (m, 2H), 5.63 (s, 1H), 5.17 (s, 1H), 5.04—5.02 (m, 2H), 4.72 (d, *J* = 1.0 Hz, 1H), 4.67 (d, *J* = 1.0 Hz, 1H), 4.61 (s, 2H), 4.36 (d, *J* = 12.4 Hz, 1H), 4.36 (s, 1H), 4.32 (d, *J* = 12.4 Hz, 1H), 4.17 (ddd, *J* = 8.6, 8.2, 5.5 Hz, 1H), 4.07 (d, *J* = 1.4 Hz, 1H), 4.03 (br dd, *J* = 6.9, 4.4 Hz, 1H), 3.72 (dd, *J* = 8.2, 8.2 Hz, 1H), 3.66 (m, 1H), 3.65 (dd, *J* = 10.3, 4.4 Hz, 1H), 3.59 (dd, *J* = 10.3, 6.9 Hz, 1H), 3.43 (dd, *J* = 9.6, 5.5 Hz, 1H), 3.25 (dd, *J* = 9.6, 5.5 Hz, 1H), 2.82 (dd, *J* = 13.4, 5.5 Hz, 1H), 2.42—2.34 (m, 2H), 2.06 (ddd, *J* = 14.8, 5.1, 4.8 Hz, 1H), 1.95 (m, 1H), 1.74 (dd, *J* = 13.4, 4.8 Hz, 1H), 1.57 (dd, *J* = 13.4, 9.6 Hz, 1H), 1.45 (dddd, *J* = 13.1, 5.1, 2.7, 2.4 Hz, 1H), 1.35 (dddd, *J* = 13.1, 12.7, 11.3, 4.8 Hz, 1H), 1.06 (d, *J* = 6.8 Hz, 3H); <sup>13</sup>C NMR (150 MHz, C<sub>6</sub>D<sub>6</sub>) δ 150.3, 146.3, 143.0, 139.2, 128.6 (×2), 128.5 (×2), 128.4, 127.9, 127.7 (×2), 127.64 (×2), 127.56, 108.7, 108.6, 107.8, 99.4, 82.2, 77.2, 74.3, 73.4, 73.34, 73.32, 72.6, 71.5, 71.0, 41.3, 39.2, 31.8, 30.2, 29.4, 19.0; HRMS (ESI) calcd for C<sub>34</sub>H<sub>42</sub>O<sub>6</sub>Na [(M + Na)<sup>+</sup>] 569.2874, found 569.2877. Data for **33**: [α]<sub>D</sub><sup>24</sup> −3.9 (*c* 0.09, C<sub>6</sub>H<sub>6</sub>); <sup>1</sup>H NMR (600 MHz, C<sub>6</sub>D<sub>6</sub>) δ 7.28—7.25 (m,

2H), 7.21—7.06 (m, 8H) 5.67 (s, 1H), 4.97 (d,  $J = 1.7$  Hz, 1H), 4.93 (d,  $J = 1.4$  Hz, 1H), 4.86 (s, 1H), 4.77 (s, 1H), 4.69 (dd,  $J = 2.0, 1.0$  Hz, 1H), 4.60 (d,  $J = 2.4$  Hz, 1H), 4.35 (d,  $J = 12.0$  Hz, 1H), 4.32 (d,  $J = 12.0$  Hz, 1H), 4.24 (s, 2H), 3.95 (dd,  $J = 5.2, 5.2$  Hz, 1H), 3.86 (ddd,  $J = 12.4, 9.3, 4.5$  Hz, 1H), 3.78 (m, 1H), 3.76 (dd,  $J = 10.0, 5.2$  Hz, 1H), 3.68 (dd,  $J = 10.0, 5.2$  Hz, 1H), 3.37 (dd,  $J = 9.3, 2.8$  Hz, 1H), 3.21 (dd,  $J = 9.2, 3.8$  Hz, 1H), 3.16 (dd,  $J = 9.2, 7.6$  Hz, 1H), 2.80 (m, 1H), 2.71 (dd,  $J = 12.4, 4.5$  Hz, 1H), 2.51 (ddd,  $J = 15.5, 10.3, 5.2$  Hz, 1H), 2.34—2.27 (m, 2H), 2.14 (d,  $J = 3.1$  Hz, 1H) 1.85 (dd,  $J = 13.0, 5.1$  Hz, 1H), 1.69 (dddd,  $J = 13.4, 10.0, 8.3, 5.2$  Hz, 1H), 1.64 (dddd,  $J = 13.4, 10.3, 6.2, 4.1$  Hz, 1H), 1.37 (dd,  $J = 13.0, 12.0$  Hz, 1H), 0.898 (d,  $J = 6.5$  Hz, 3H);  $^{13}\text{C}$  NMR (150 MHz,  $\text{C}_6\text{D}_6$ )  $\delta$  149.5, 149.0, 142.4, 138.91, 138.86, 128.6 ( $\times 2$ ), 128.5 ( $\times 2$ ), 128.4, 127.9, 127.7 ( $\times 2$ ), 127.6 ( $\times 2$ ), 111.8, 110.6, 108.4, 101.0, 83.6, 80.2, 78.3, 75.0, 73.5, 73.2, 70.7, 70.0, 67.8, 43.4, 39.7, 32.7, 28.0, 26.7, 17.2; HRMS (ESI) calcd for  $\text{C}_{34}\text{H}_{42}\text{O}_6\text{Na}$   $[(\text{M} + \text{Na})^+]$  569.2874, found 569.2879.

Data for **34**:  $[\alpha]_{\text{D}}^{24} -13.6$  ( $c$  0.31,  $\text{C}_6\text{H}_6$ );  $^1\text{H}$  NMR (600 MHz,  $\text{C}_6\text{D}_6$ )  $\delta$  7.32—7.31 (m, 2H), 7.27—7.26 (m, 2H), 7.20—7.15 (m, 4H), 7.11—7.05 (m, 2H), 5.18 (s, 1H), 4.95 (s, 1H), 4.87 (s, 1H), 4.79 (s, 1H), 4.76 (s, 1H), 4.70 (s, 1H), 4.45 (dddd,  $J = 11.3, 6.5, 3.8, 3.8$  Hz, 1H), 4.44 (d,  $J = 12.4$  Hz, 1H), 4.37 (d,  $J = 12.4$  Hz, 1H), 4.34 (d,  $J = 12.4$  Hz, 1H), 4.31 (d,  $J = 7.9$  Hz, 1H), 4.30 (d,  $J = 12.4$  Hz, 1H), 4.09 (dd,  $J = 6.2, 4.4$  Hz, 1H), 4.06 (ddd,  $J = 8.6, 6.8, 4.5$  Hz, 1H), 4.00 (dd,  $J = 7.9, 6.8$  Hz, 1H), 3.82 (br s, 1H), 3.71 (dd,  $J = 10.6, 4.4$  Hz, 1H), 3.60 (dd,  $J = 10.6, 6.2$  Hz, 1H), 3.37 (dd,  $J = 10.0, 6.5$  Hz, 1H), 3.25 (dd,  $J = 10.0, 3.8$  Hz, 1H), 2.99 (m, 1H), 2.75 (dd,  $J = 13.4, 4.5$  Hz, 1H), 2.47 (dd,  $J = 13.4, 8.6$  Hz, 1H), 2.40 (m, 1H), 2.03 (ddd,  $J = 13.4, 4.8, 4.8$  Hz, 1H), 1.98 (dd,  $J = 13.1, 4.8$  Hz, 1H), 1.68 (dd,  $J = 13.1, 13.1$  Hz, 1H), 1.42 (dddd,  $J = 13.0, 5.5, 4.8, 3.8$  Hz, 1H), 1.35 (dddd,  $J = 13.0, 12.4, 11.3, 4.8$  Hz, 1H), 0.95 (d,  $J = 6.5$  Hz, 3H);  $^{13}\text{C}$

NMR (150 MHz, C<sub>6</sub>D<sub>6</sub>)  $\delta$  149.2, 146.2, 143.7, 139.5, 138.7, 128.6 ( $\times 2$ ), 128.5 ( $\times 2$ ), 127.9 ( $\times 2$ ), 127.7 ( $\times 2$ ), 127.6, 127.5, 109.8, 108.9, 108.6, 99.5, 80.5, 80.1, 77.2, 73.6, 73.4, 73.4, 71.8, 71.3, 70.0, 41.9, 40.2, 29.6, 29.3, 28.2, 18.2; HRMS (ESI) calcd for C<sub>34</sub>H<sub>42</sub>O<sub>6</sub>Na [(M + Na)<sup>+</sup>] 569.2874, found 569.2879.

**Scheme S1.** Stereochemical Assignment of Allylic Alcohol **29**

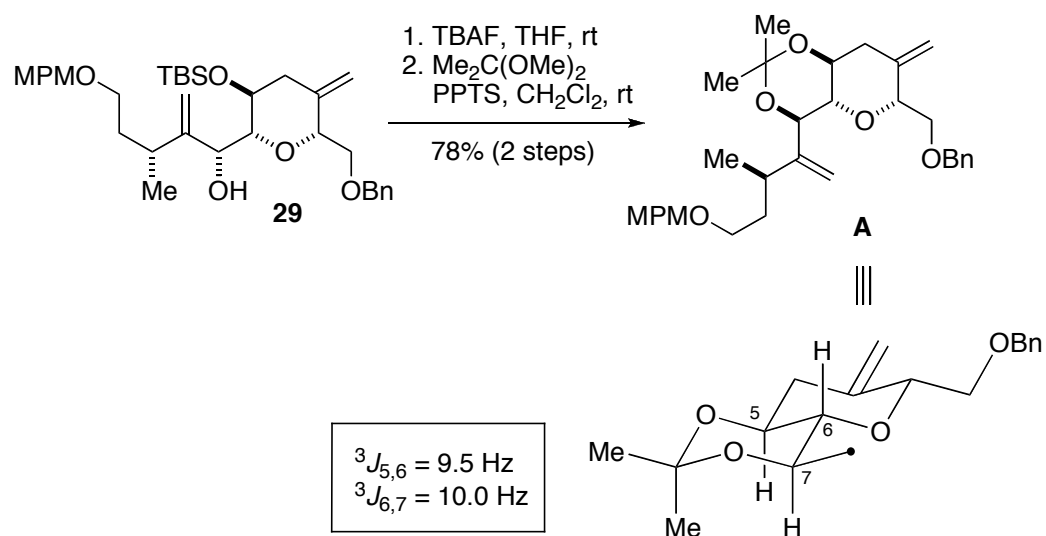

Alcohol **29** was transformed into acetonide **A** via desilylation and acetalization.  $^1\text{H}$  NMR analysis on **A** based on  $^3J_{\text{H,H}}$  values established the stereochemistry of the C7 stereogenic center as shown.



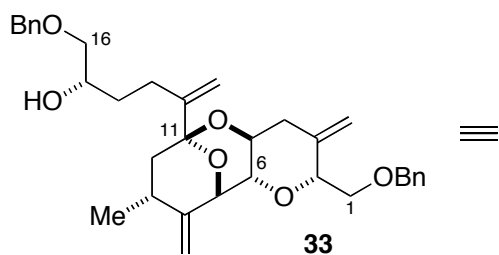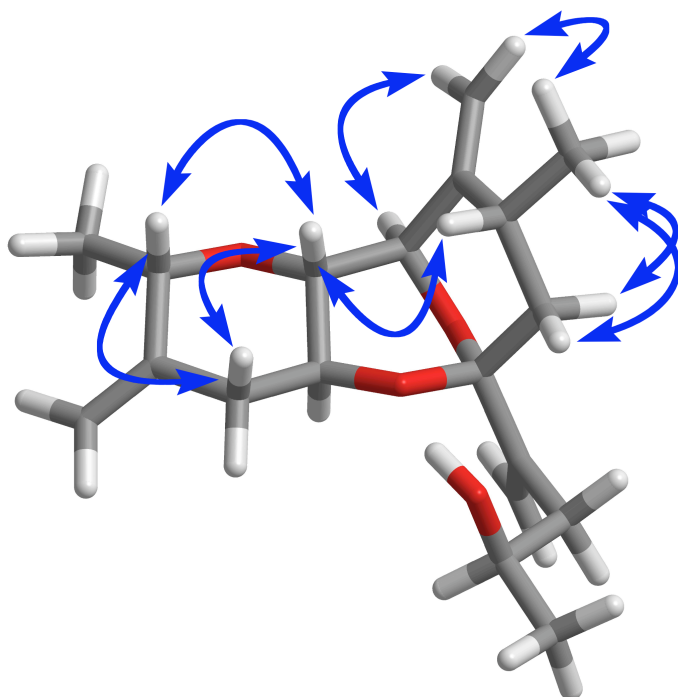

**Figure S1.** Stereochemical assignment of fused acetal **33**. The double-ended blue arrows denote important NOEs. The benzyloxy groups are omitted for clarity in the 3D model. The structure of the 3D model was generated by MMFF94s conformational searches followed by geometry optimization (HF6-31G\*//PM3 level of theory).

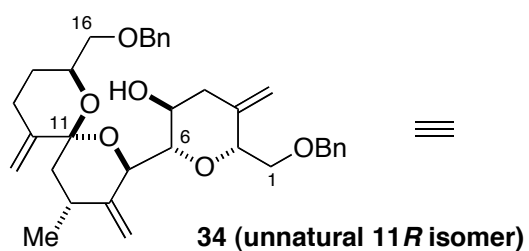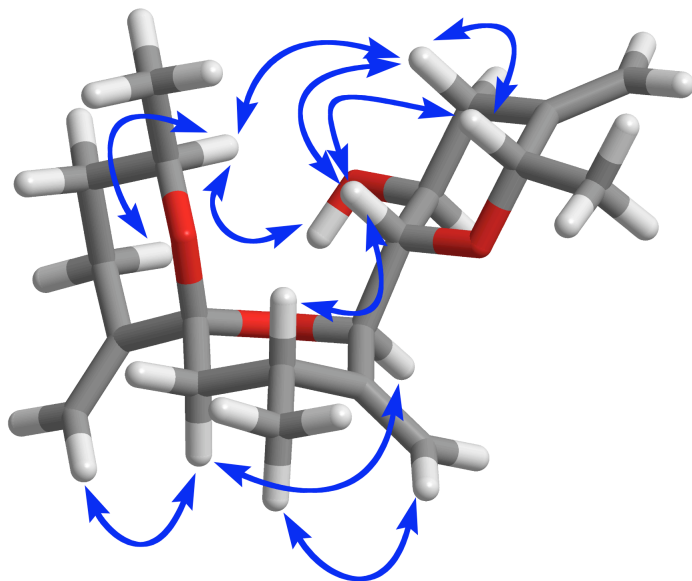

**Figure S2.** Stereochemical assignment of unnatural spiroacetal **34**. The double-ended blue arrows denote important NOEs. The benzyloxy groups are omitted for clarity in the 3D model. The structure of the 3D model was generated by MMFF94s conformational searches followed by geometry optimization (HF6-31G\*//PM3 level of theory).

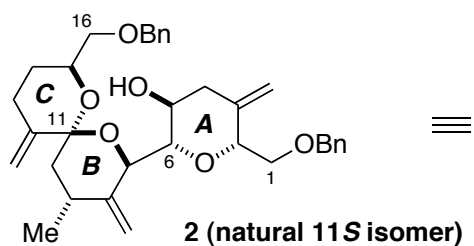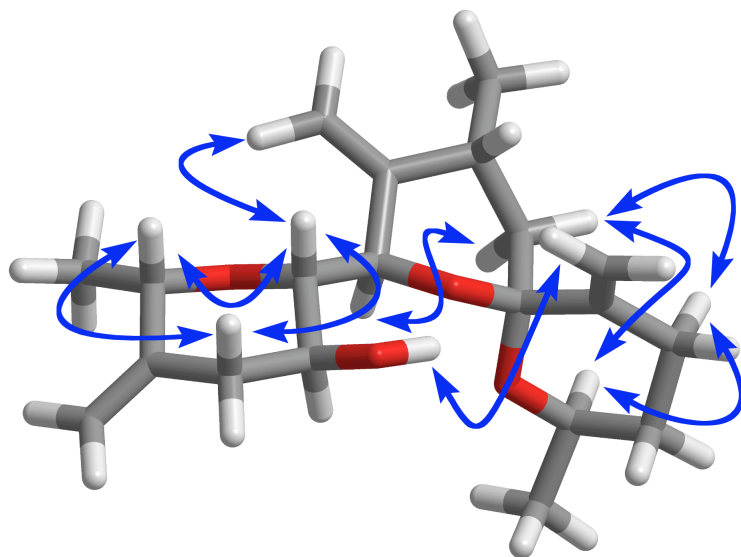

**Figure S3.** Stereochemical assignment of natural spiroacetal **2**. The double-ended blue arrows denote important NOEs. The benzyloxy groups are omitted for clarity in the 3D model. The structure of the 3D model was generated by MMFF94s conformational searches followed by geometry optimization (HF6-31G\*//PM3 level of theory).

# STANDARD PROTON PARAMETERS

Pulse Sequence: s2pul

Solvent: CDCl<sub>3</sub>

Temp. 20.0 C / 293.1 K

INOVA-500 "varian"

Relax. delay 1.000 sec

Pulse 45.0 degrees

Acq. time 1.892 sec

Width 8000.0 Hz

32 repetitions

OBSERVE H1, 499.8593228 MHz

DATA PROCESSING

FT size 32768

Total time 1 min, 32 sec

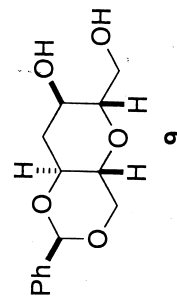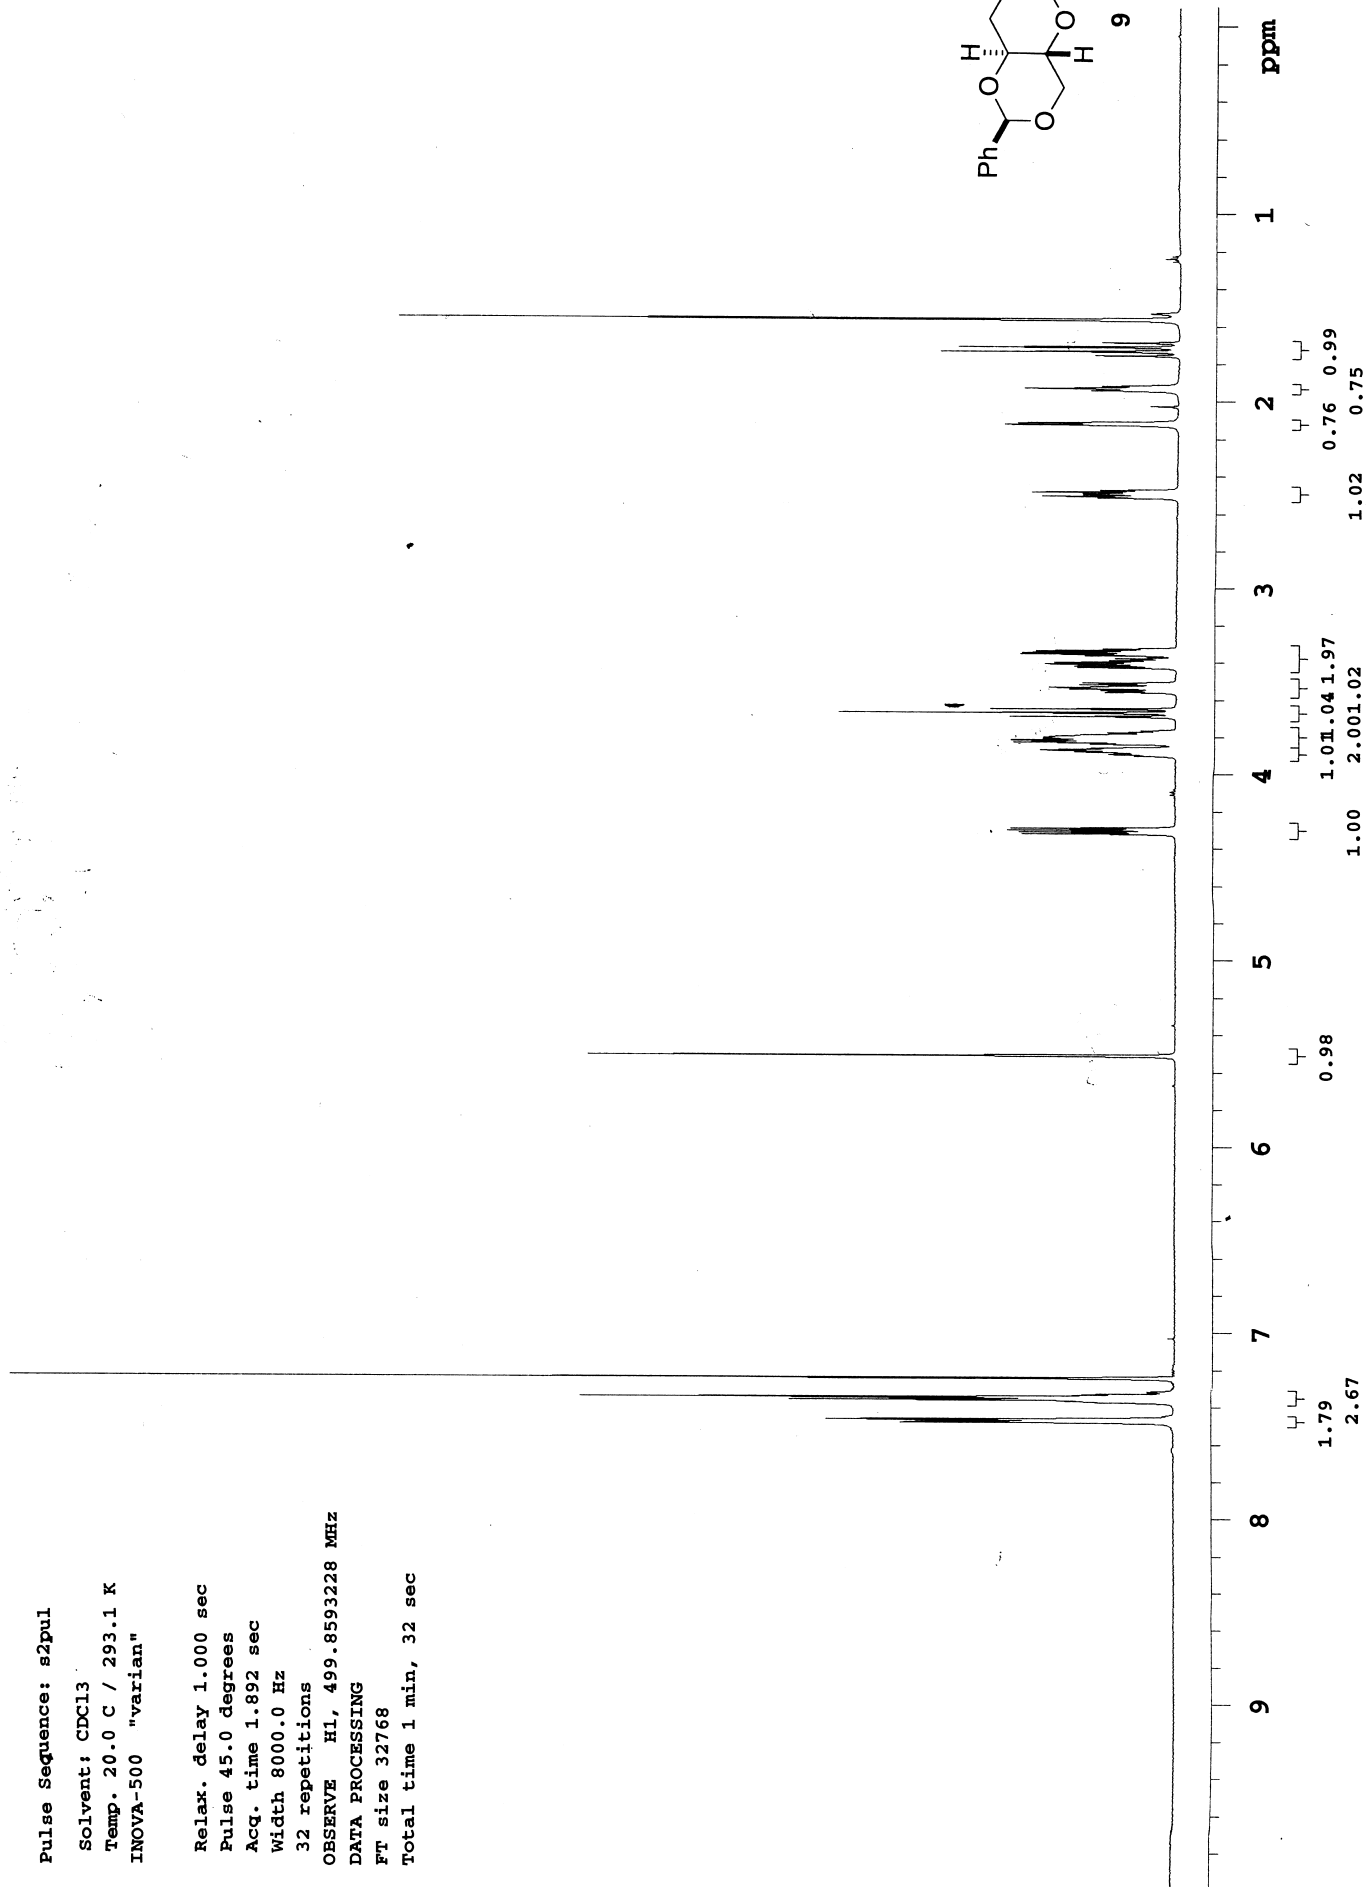

# STANDARD CARBON PARAMETERS

Pulse Sequence: s2pul

Solvent: CDCl<sub>3</sub>

Temp. 20.0 C / 293.1 K

User: 1-14-87

INOVA-500 "varian"

Relax. delay 0.700 sec

Pulse 45.0 degrees

Acq. time 1.298 sec

Width 37735.8 Hz

512 repetitions

OBSERVE C13, 125.6897243 MHz

DECOUPLE H1, 499.8618041 MHz

Power 27 dB

continuously on

WALTZ-16 modulated

DATA PROCESSING

Line broadening 0.5 Hz

FT size 131072

Total time 34 min, 15 sec

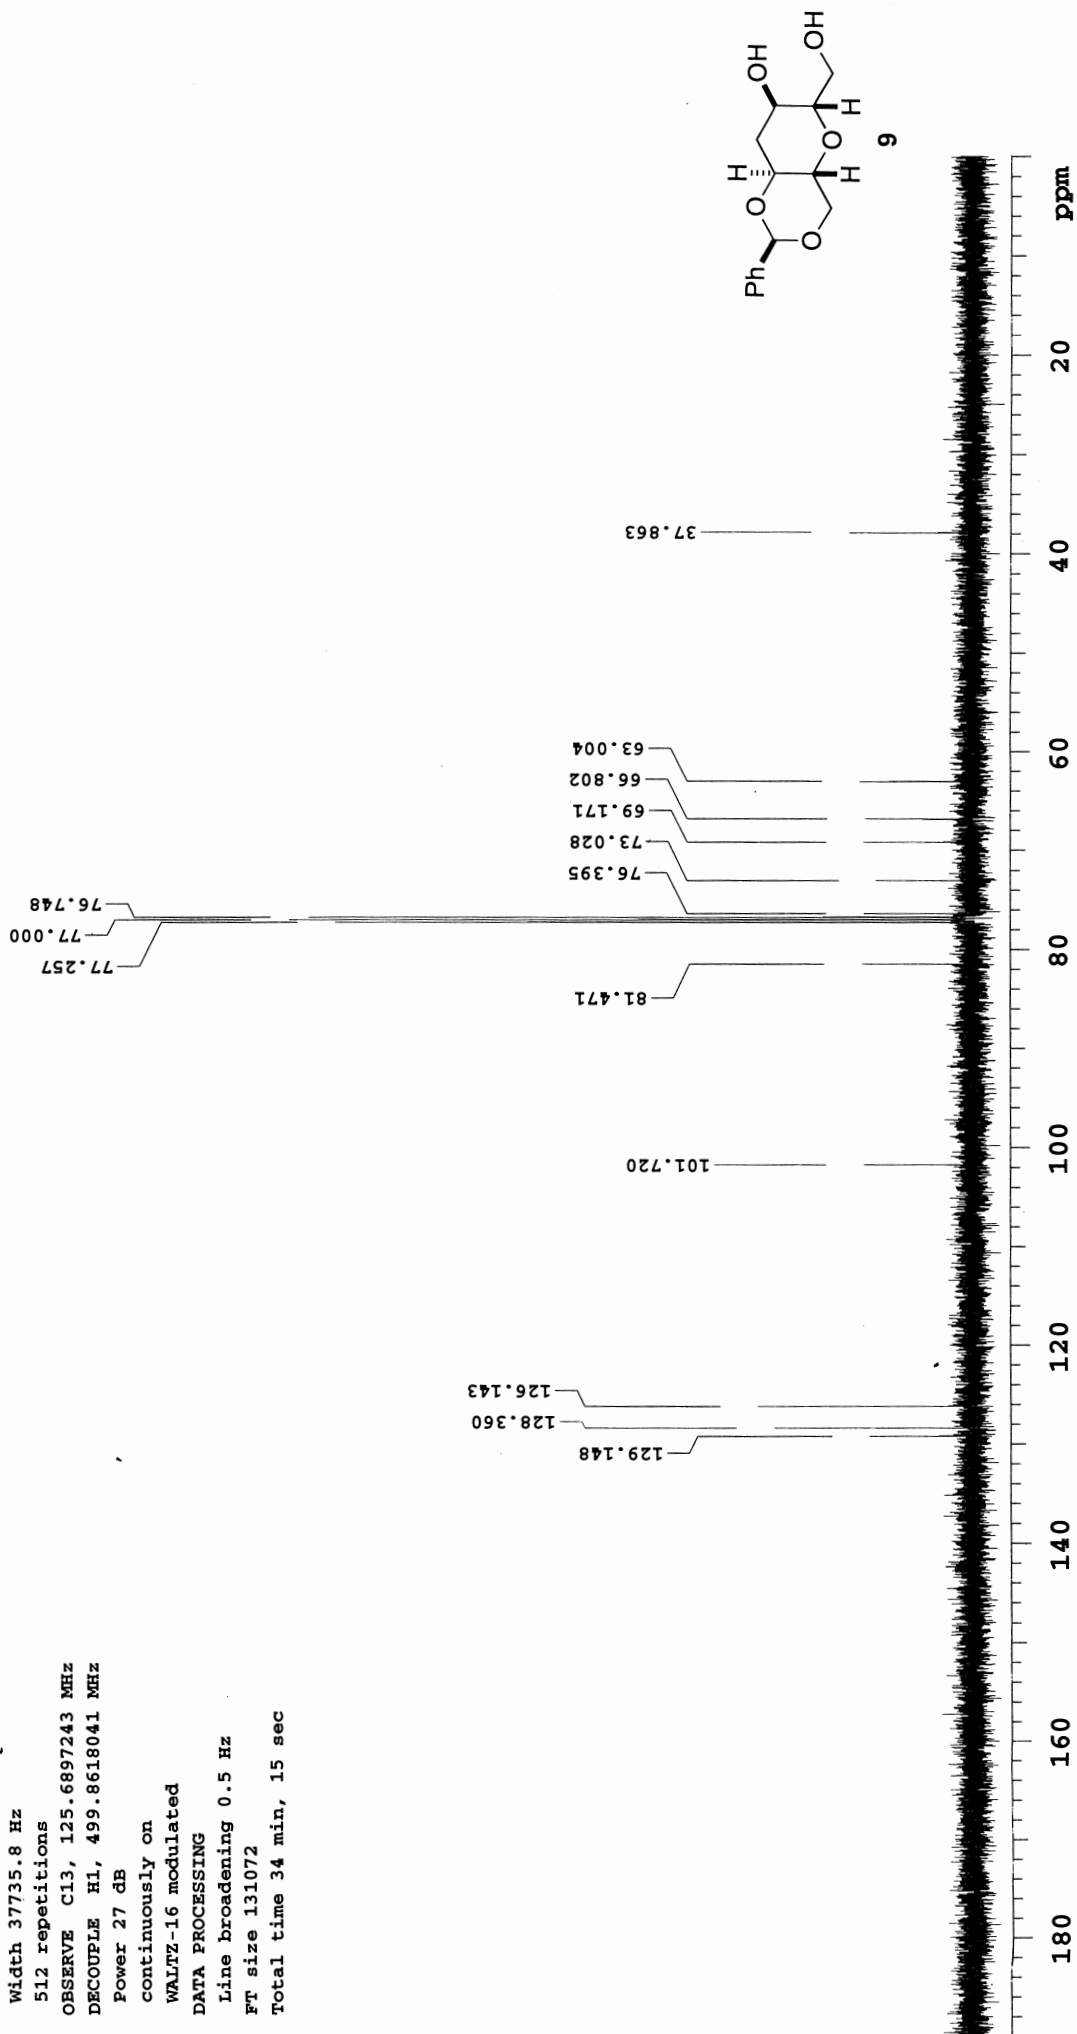

# STANDARD PROTON PARAMETERS

Pulse Sequence: s2pul

Solvent: ~~benzene~~ *acet*

Temp. 20.0 C / 293.1 K

INOVA-500 "varian"

Relax. delay 1.000 sec

Pulse 45.0 degrees

Acq. time 1.892 sec

Width 8000.0 Hz

32 repetitions

OBSERVE H1, 499.8593224 MHz

DATA PROCESSING

FT size 32768

Total time 1 min, 32 sec

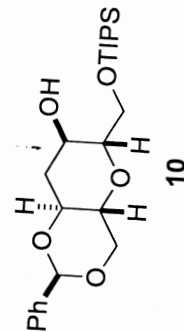

10

|  | 9 | 8            | 7 | 6 | 5    | 4                                 | 3 | 2    | 1     | ppm |
|--|---|--------------|---|---|------|-----------------------------------|---|------|-------|-----|
|  |   | 1.88<br>2.77 |   |   | 0.99 | 0.981.931.01<br>1.00 1.011.021.99 |   | 1.01 | 21.06 |     |
|  |   |              |   |   |      |                                   |   | 1.09 |       |     |

# STANDARD CARBON PARAMETERS

Pulse Sequence: s2pul

Solvent: CDCl<sub>3</sub>

Temp. 20.0 C / 293.1 K

User: 1-14-87

INOVA-500 "varian"

Relax. delay 0.700 sec

Pulse 45.0 degrees

Acq. time 1.298 sec

Width 37735.8 Hz

96 repetitions

OBSERVE C13, 125.6897352 MHz

DECOUPLE H1, 499.8618041 MHz

Power 27 dB

continuously on

WALTZ-16 modulated

DATA PROCESSING

Line broadening 0.5 Hz

FT size 131072

Total time 2 hr, 51 min, 19 sec

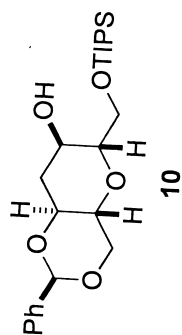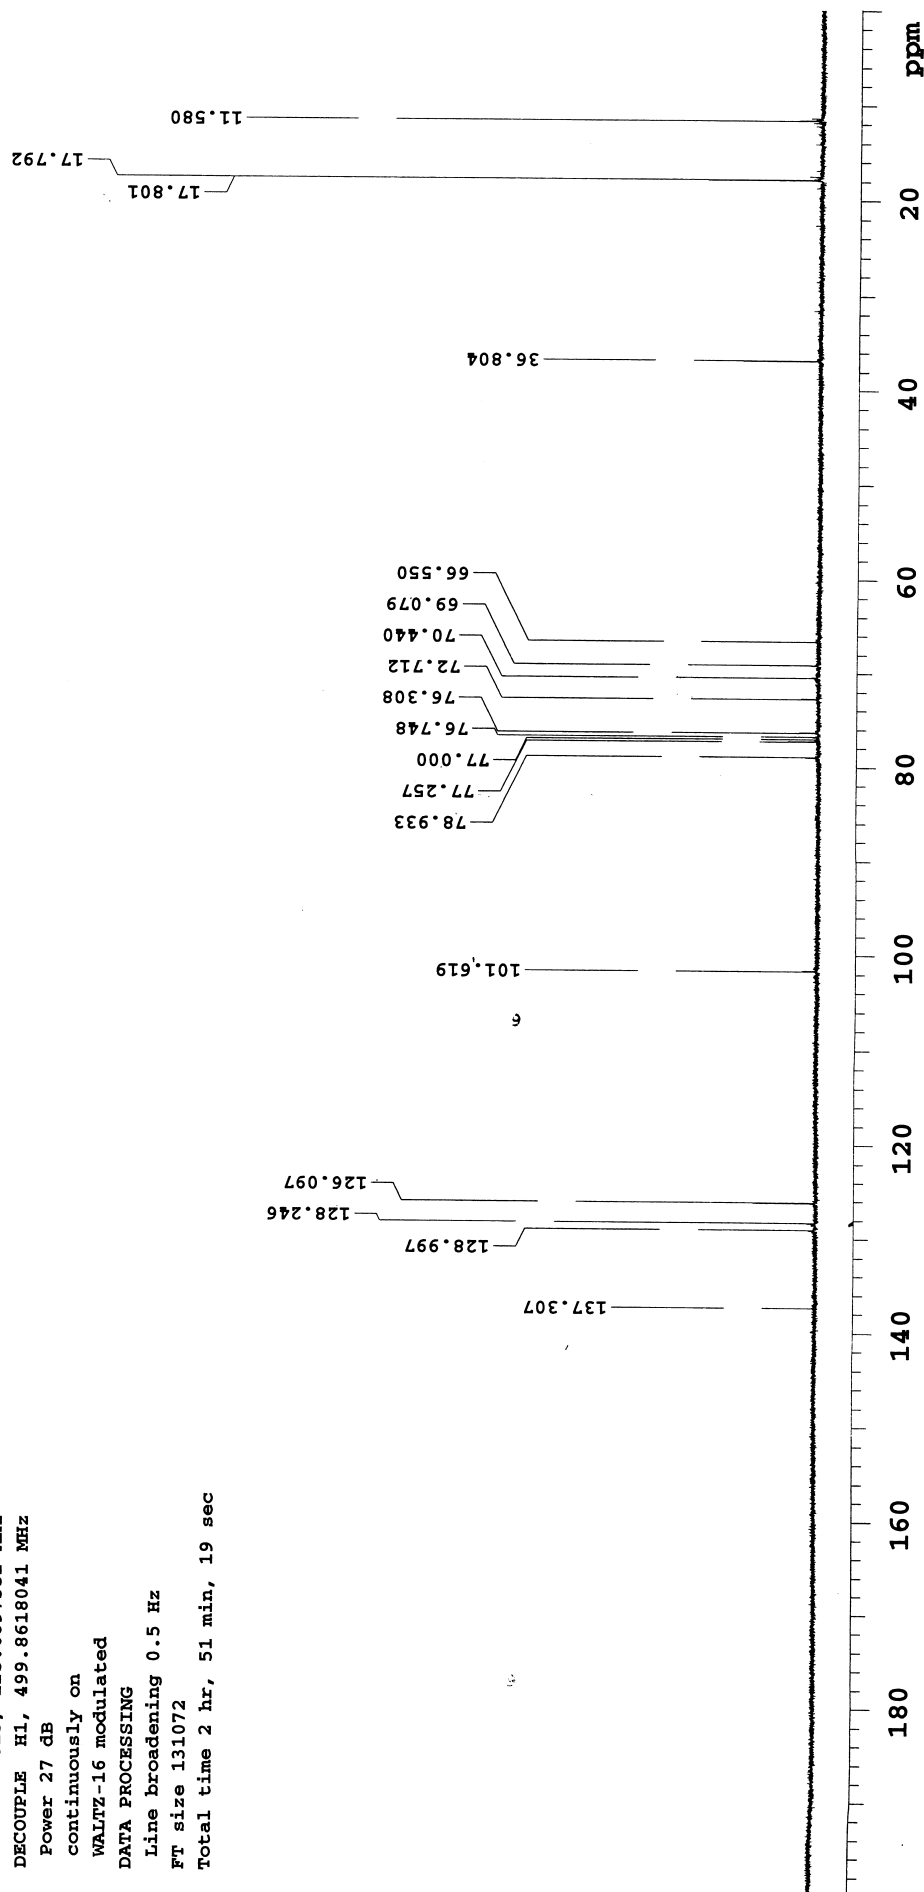

STANDARD PROTON PARAMETERS

Pulse Sequence: s2pul

Solvent: CDCl3

Temp. 20.0 C / 293.1 K

INOVA-500 "varian"

Relax. delay 1.000 sec

Pulse 45.0 degrees

Acq. time 1.892 sec

Width 8000.0 Hz

32 repetitions

OBSERVE H1, 499.8593223 MHz

DATA PROCESSING

Ft size 32768

Total time 1 min, 32 sec

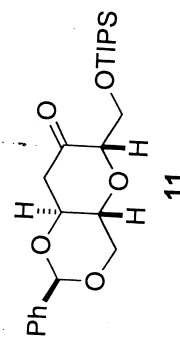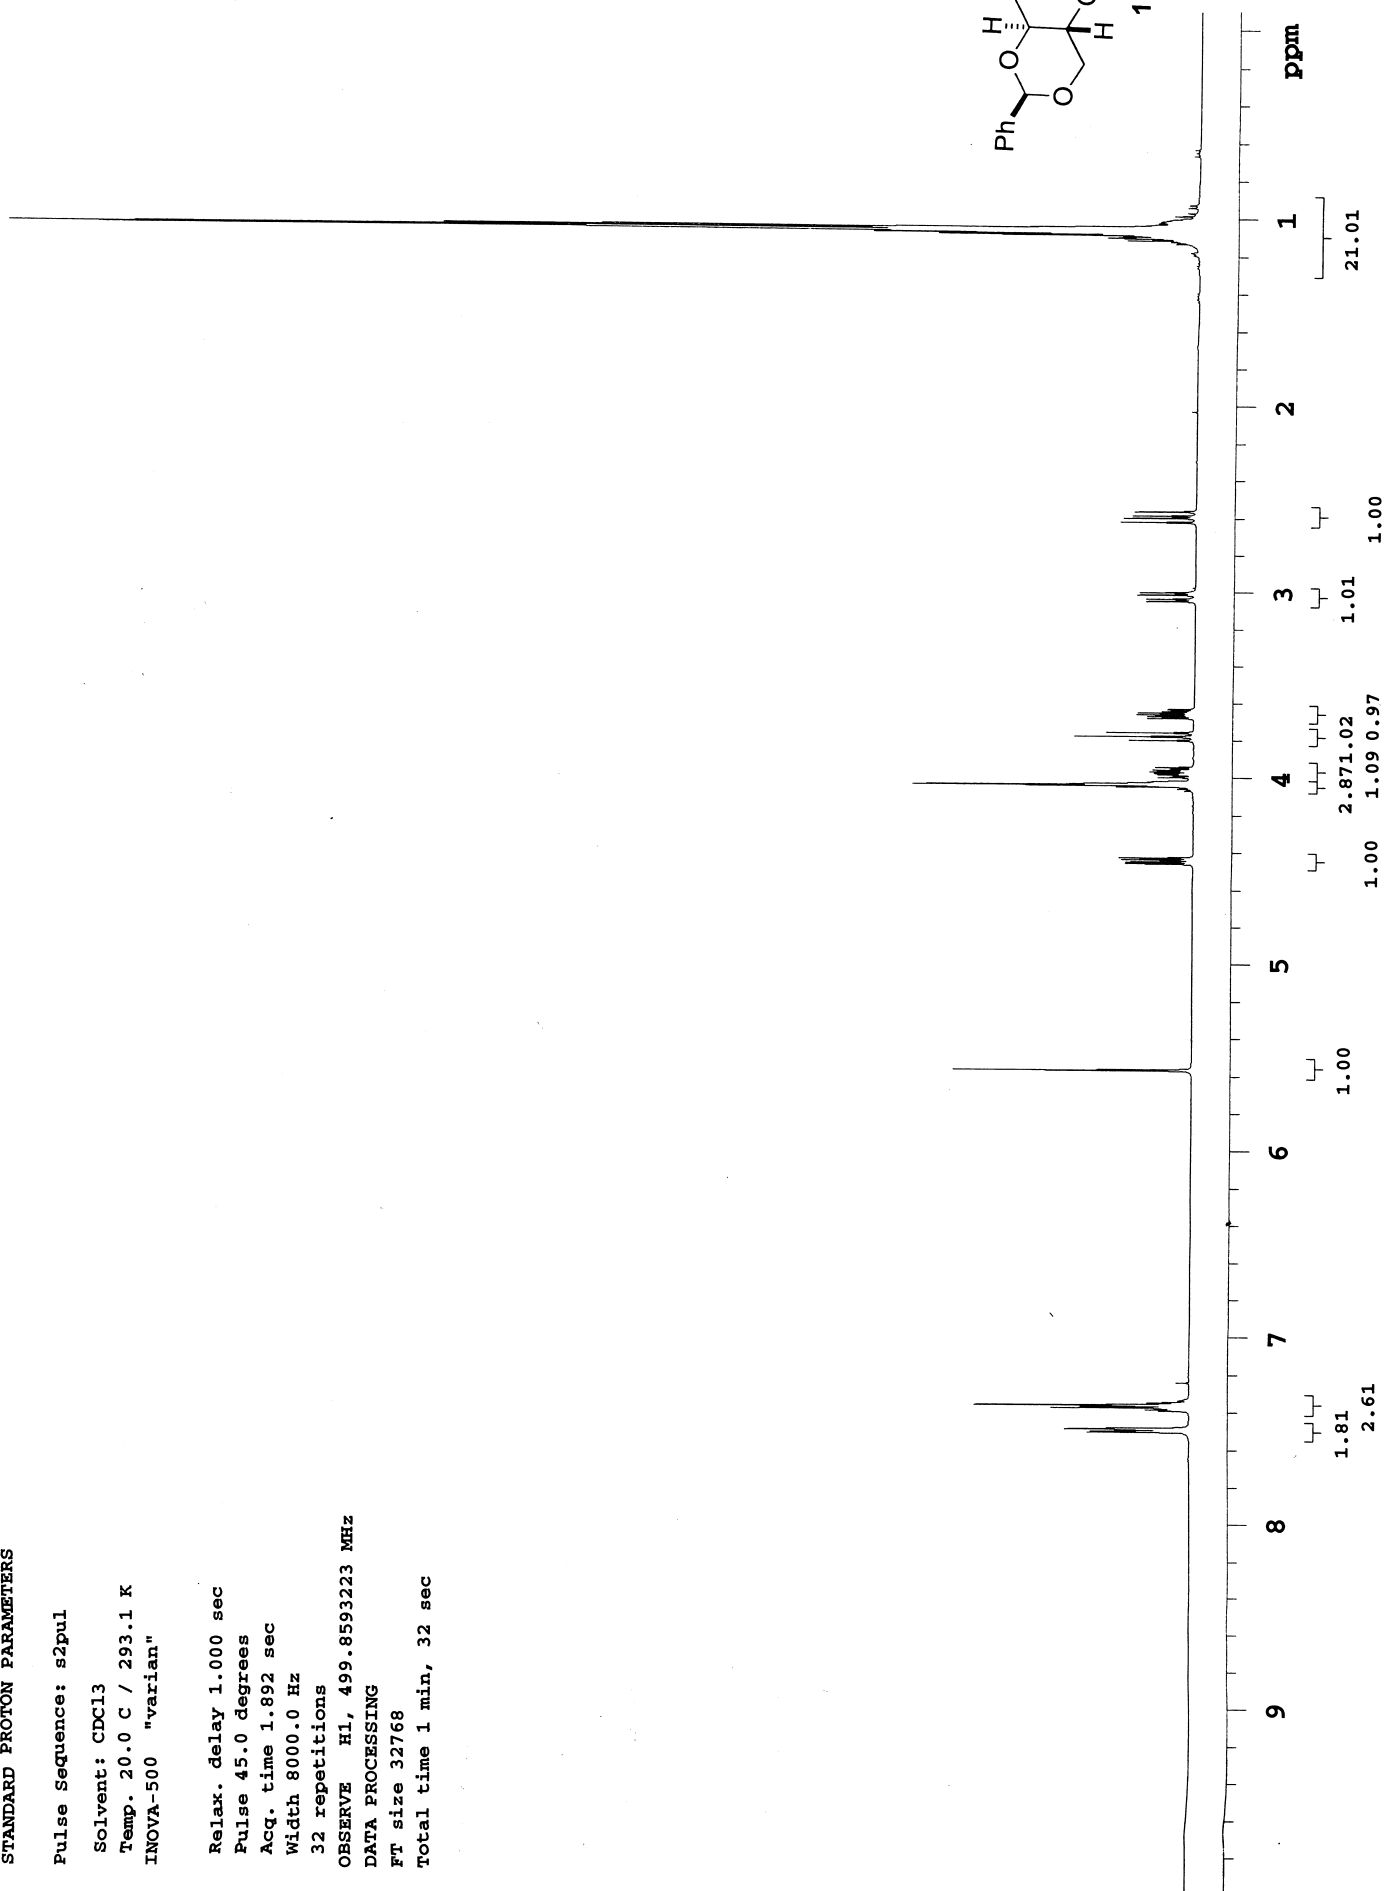



# STANDARD CARBON PARAMETERS

Pulse Sequence: s2pul

Solvent: CDCl<sub>3</sub>

Temp. 20.0 C / 293.1 K

User: 1-14-87

INOVA-500 "varian"

Relax. delay 0.700 sec

Pulse 45.0 degrees

Acq. time 1.298 sec

Width 37735.8 Hz

128 repetitions

OBSERVE C13, 125.6897352 MHz

DECOUPLE H1, 499.8618041 MHz

Power 27 dB

continuously on

WALTZ-16 modulated

DATA PROCESSING

Line broadening 0.5 Hz

FT size 131072

Total time 4 min, 16 sec

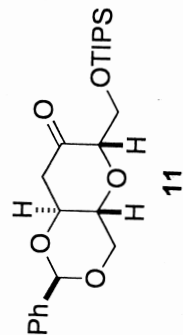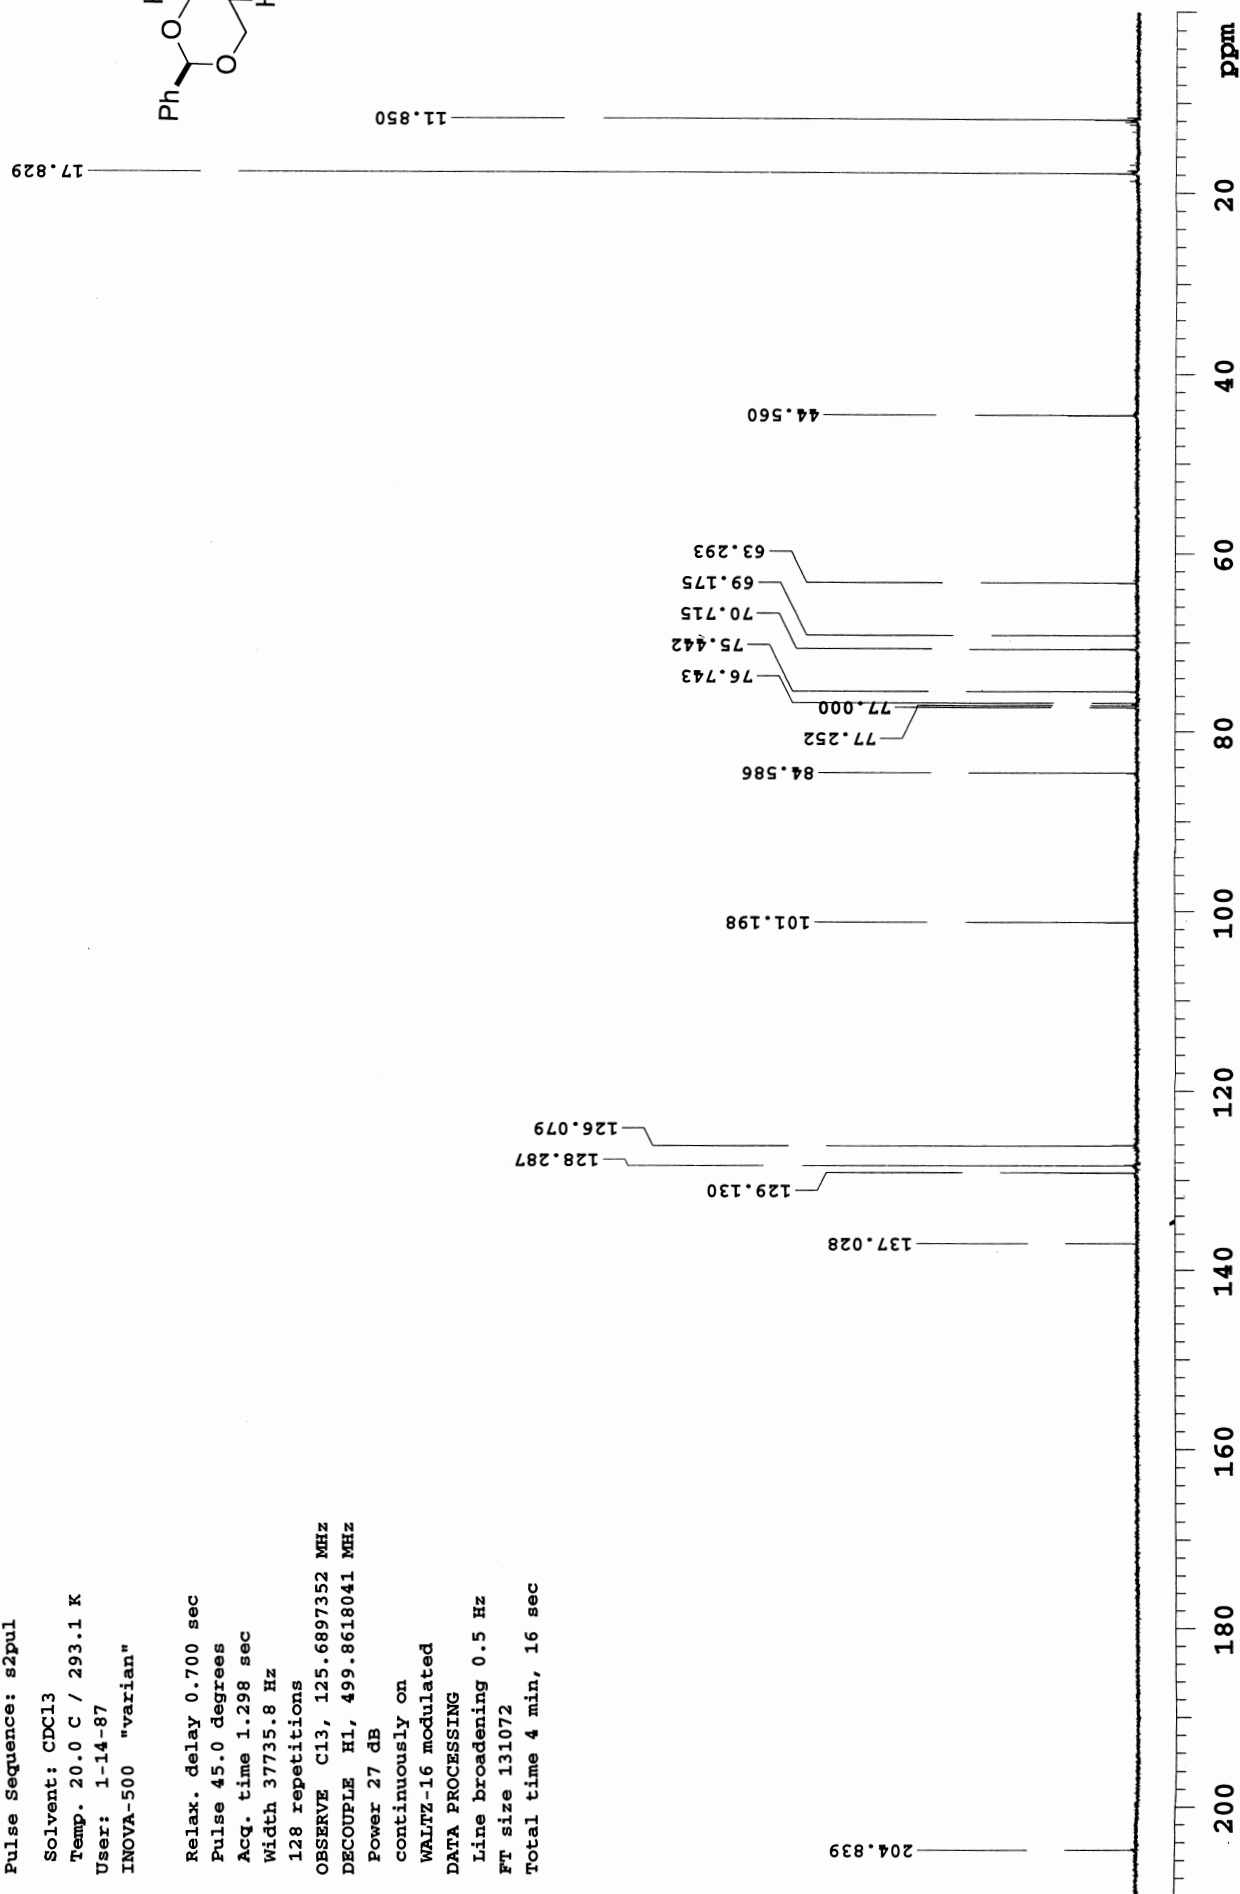

STANDARD PROTON PARAMETERS

Pulse Sequence: s2pul

Solvent: CDCl3

Temp. 20.0 C / 293.1 K

INOVA-500 "varian"

Relax. delay 1.000 sec

Pulse 45.0 degrees

Acq. time 1.892 sec

Width 8000.0 Hz

32 repetitions

OBSERVE H1, 499.8593228 MHz

DATA PROCESSING

FT size 32768

Total time 1 min, 32 sec

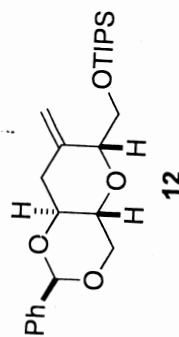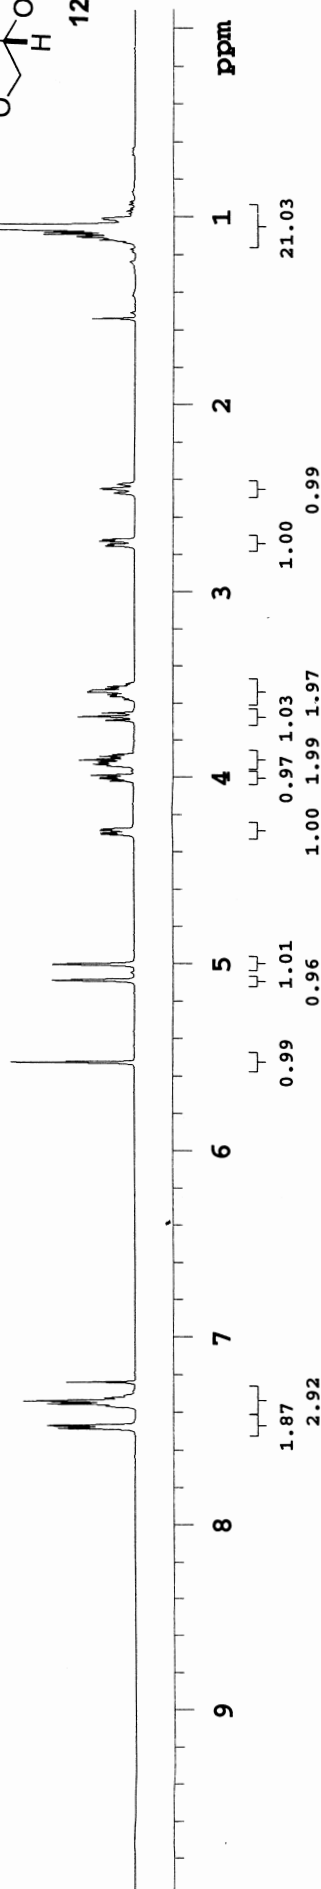

# STANDARD CARBON PARAMETERS

Pulse Sequence: s2pul

Solvent: CDCl<sub>3</sub>

Temp. 20.0 C / 293.1 K

User: 1-14-87

INOVA-500 "varian"

Relax. delay 0.700 sec

Pulse 45.0 degrees

Acq. time 1.298 sec

Width 37735.8 Hz

288 repetitions

OBSERVE C13, 125.6897260 MHz

DECOUPLE H1, 499.8618041 MHz

Power 27 dB

continuously on

WALTZ-16 modulated

DATA PROCESSING

Line broadening 0.5 Hz

FT size 131072

Total time 17 min, 7 sec

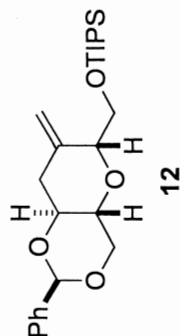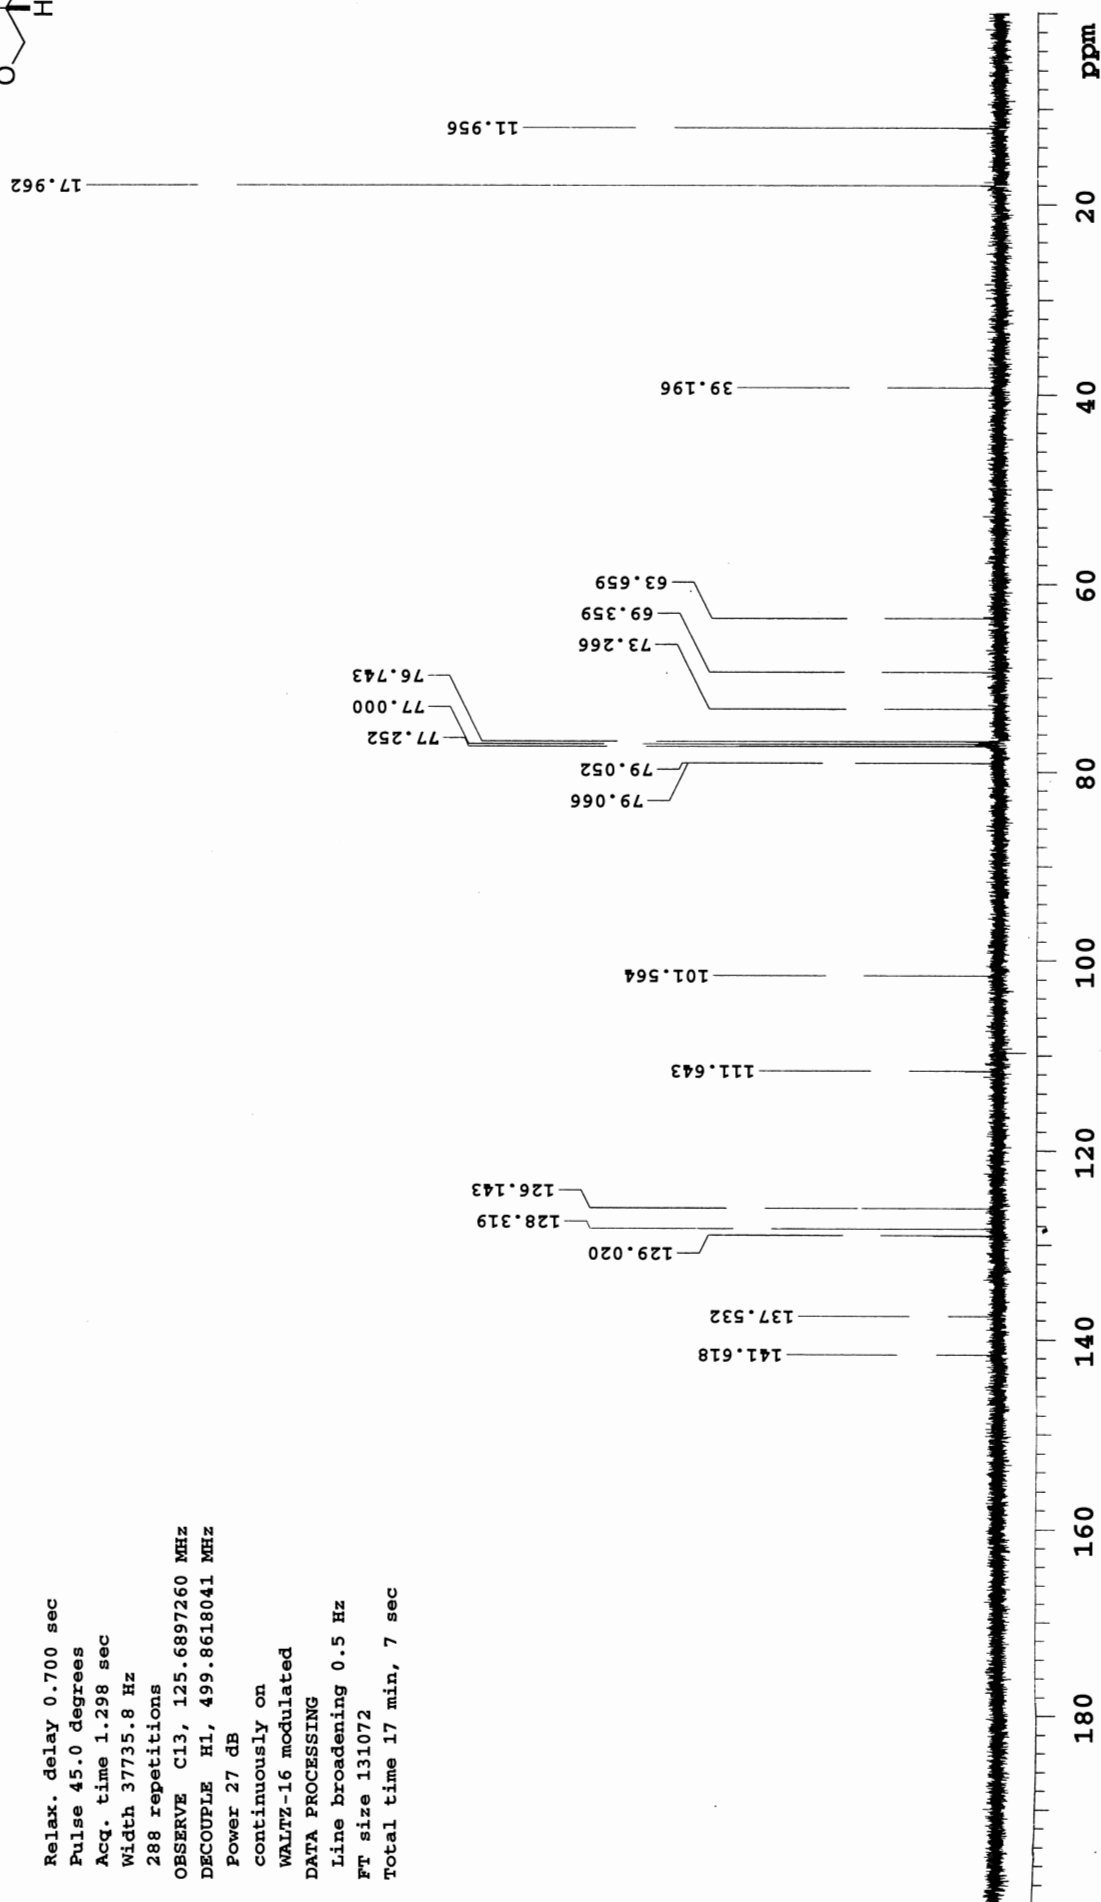

STANDARD PROTON PARAMETERS

Pulse Sequence: s2pul

Solvent: CDCl3

Temp. 20.0 C / 293.1 K

INOVA-500 "varian"

Relax. delay 1.000 sec

Pulse 45.0 degrees

Acq. time 1.892 sec

Width 8000.0 Hz

32 repetitions

OBSERVE H1, 499.8593228 MHz

DATA PROCESSING

FT size 32768

Total time 1 min, 32 sec

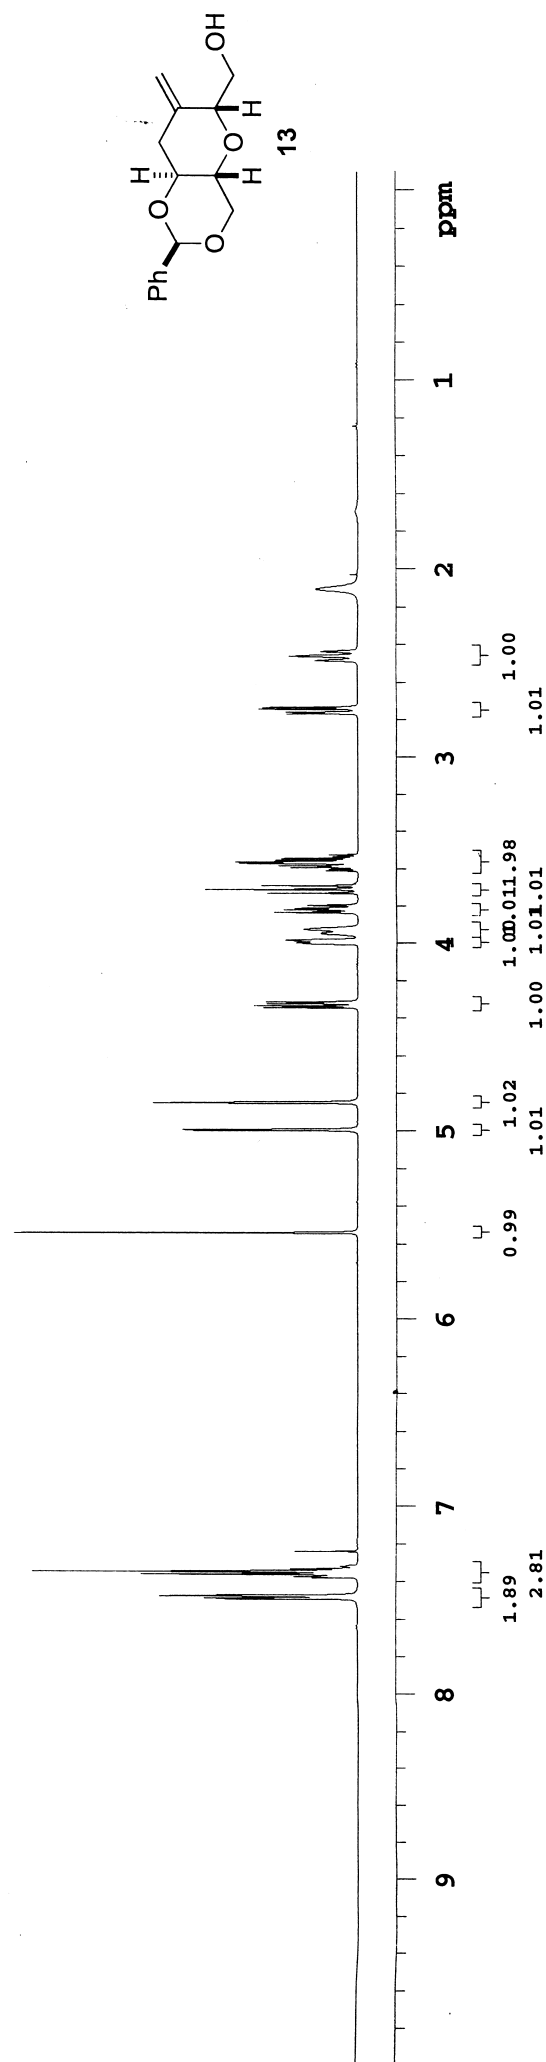

# STANDARD CARBON PARAMETERS

Pulse Sequence: s2pul

Solvent: CDCl3

Temp. 20.0 C / 293.1 K

User: 1-14-87

INOVA-500 "varian"

Relax. delay 0.700 sec

Pulse 45.0 degrees

Acq. time 1.298 sec

Width 37735.8 Hz

96 repetitions

OBSERVE C13, 125.6897329 MHz

DECOUPLE H1, 499.8618041 MHz

Power 27 dB

continuously on

WALTZ-16 modulated

DATA PROCESSING

Line broadening 0.5 Hz

FT size 131072

Total time 2 hr, 51 min, 19 sec

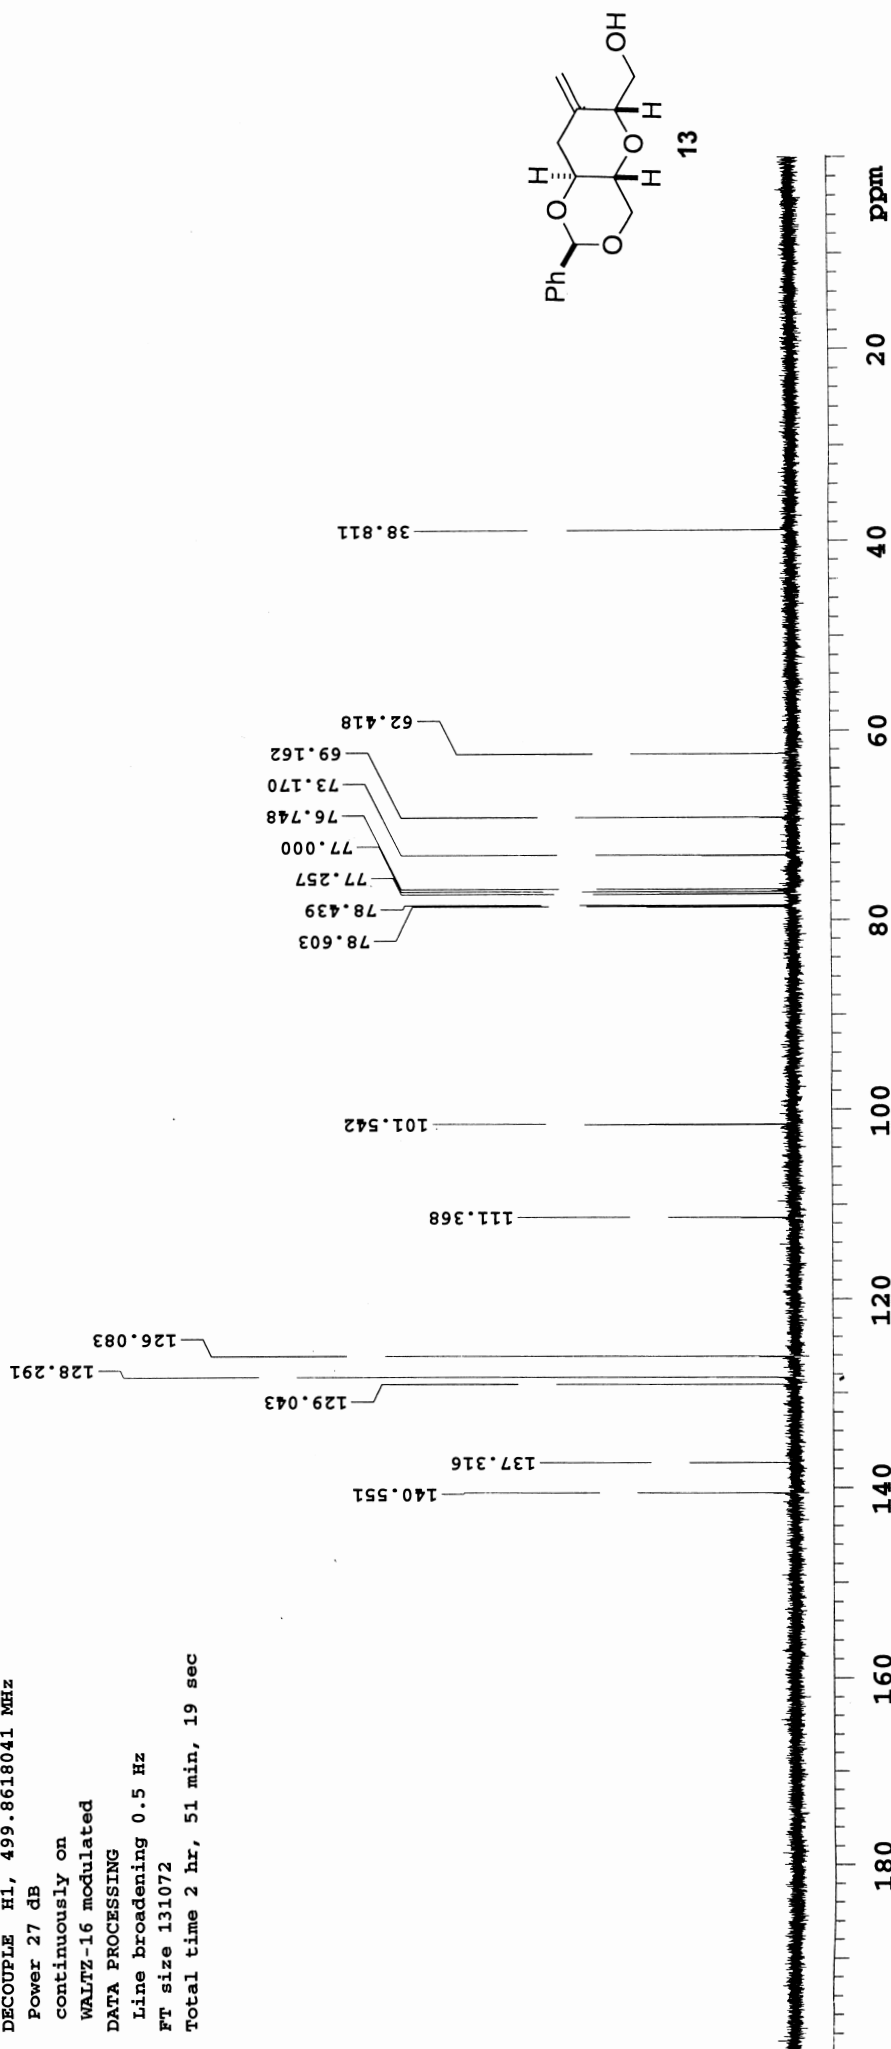

```

Filename = C:\Users\delta\Documents\J
Author = delta
Experiment = Proton.jxp
Sample_Id = MN-I-84
Solvent = CHLOROFORM-D
Creation_Time = 7-OCT-2010 19:52:55
Revision_Time = 7-OCT-2010 19:57:15
Current_Time = 7-OCT-2010 19:57:36

Comment = single_pulse
Data_Format = 1D COMPLEX
Dim_Size = 26214
Dim_Title = Proton
Dim_Units = [ppm]
Dimensions = X
Site = ECA600
Spectrometer = DELTA2_NMR

Field_Strength = 14.09636928[T] (600[MHz])
X_Acq_Duration = 2.9097984[s]
X_Domain = 1H
X_Freq = 600.1723046[MHz]
X_Offset = 5[ppm]
X_Points = 32768
X_Prescans = 1
X_Resolution = 0.34366642[Hz]
X_Sweep = 11.26126126[kHz]
X_Sweep_Clipped = 9.00900901[kHz]
Irr_Domain = Proton
Irr_Freq = 600.1723046[MHz]
Irr_Offset = 5[ppm]
Tri_Domain = Proton
Tri_Freq = 600.1723046[MHz]
Tri_Offset = 5[ppm]
Clipped = FALSE
Mod_Return = 1
Probe_Recovery = 5[us]
Scans = 8
Total_Scans = 8

X_90_Width = 12.4[us]
X_Acq_Time = 2.9097984[s]
X_Angle = 45[deg]
X_Atn = 3[db]
X_Pulse = 6.2[us]
Irr_Mode = Off
Tri_Mode = Off
Dante_Presat = FALSE
Initial_Wait = 1[s]
Recvr_Gain = 44
Relaxation_Delay = 1[s]
Repetition_Time = 3.9037984[s]
Temp_Get = 22.3[dc]

```

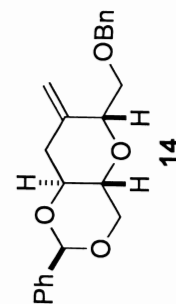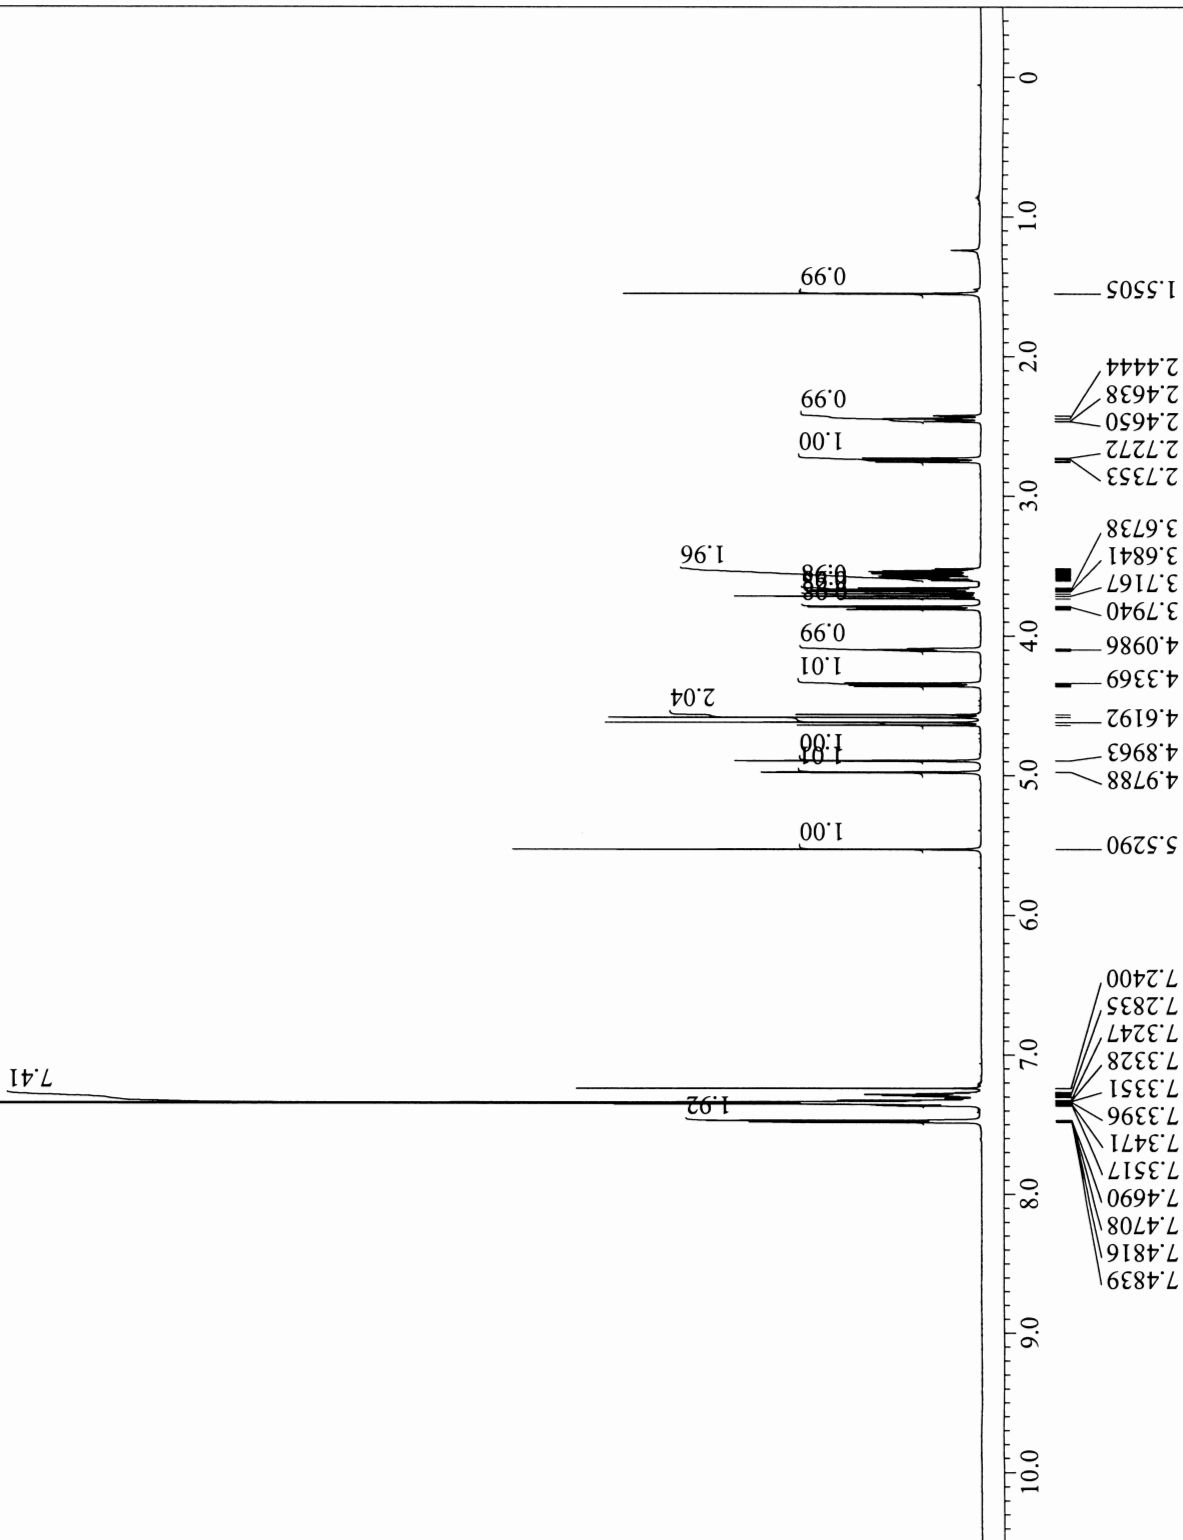

X : parts per Million : Proton : parts per Million

Filename = C:\Users\delta\Documents\J  
 Author = delta  
 Experiment = carbon.jxp  
 Sample\_Id = MN-I-84  
 Solvent = CHLOROFORM-D  
 Creation\_Time = 7-OCT-2010 19:55:50  
 Revision\_Time = 7-OCT-2010 20:03:54  
 Current\_Time = 7-OCT-2010 20:04:34  
 Comment = single pulse decoupled gat  
 Data\_Format = 1D COMPLEX  
 Dim\_Size = 26214  
 Dim\_Title = Carbon13  
 Dim\_Units = [ppm]  
 Dimensions = X  
 Site = ECA600  
 Spectrometer = DELTA2\_NMR  
 Field\_Strength = 14.09636928[T] (600[MHz])  
 X\_Acq\_Duration = 0.69206016[s]  
 X\_Domain = 13C  
 X\_Freq = 150.91343039[MHz]  
 X\_Offset = 100[ppm]  
 X\_Points = 32768  
 X\_Prescans = 4  
 X\_Resolution = 1.44496109[Hz]  
 X\_Sweep = 47.34848485[kHz]  
 X\_Sweep\_Clipped = 37.87878788[kHz]  
 Irr\_Domain = Proton  
 Irr\_Freq = 600.1723046[MHz]  
 Irr\_Offset = 5[ppm]  
 Clipped = FALSE  
 Mod\_Return = 1  
 Probe\_Recovery = 20[us]  
 Scans = 121  
 Total\_Scans = 121  
 X\_90\_Width = 8.4[us]  
 X\_Acq\_Time = 0.69206016[s]  
 X\_Angle = 30[deg]  
 X\_Atn = 6.4[db]  
 X\_Pulse = 2.8[us]  
 Irr\_Atn\_Dec = 18[db]  
 Irr\_Atn\_Noe = 18[db]  
 Irr\_Noise = WALTZ  
 Irr\_Pwidth = 76[us]  
 Decoupling = TRUE  
 Initial\_Wait = 1[s]  
 Noe = TRUE  
 Noe\_Time = 2[s]  
 Recvr\_Gain = 56  
 Relaxation\_Delay = 2[s]  
 Repetition\_Time = 2.69206016[s]  
 Temp\_Get = 23[dc]

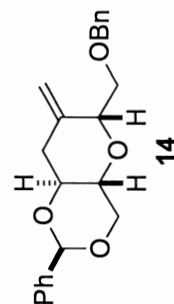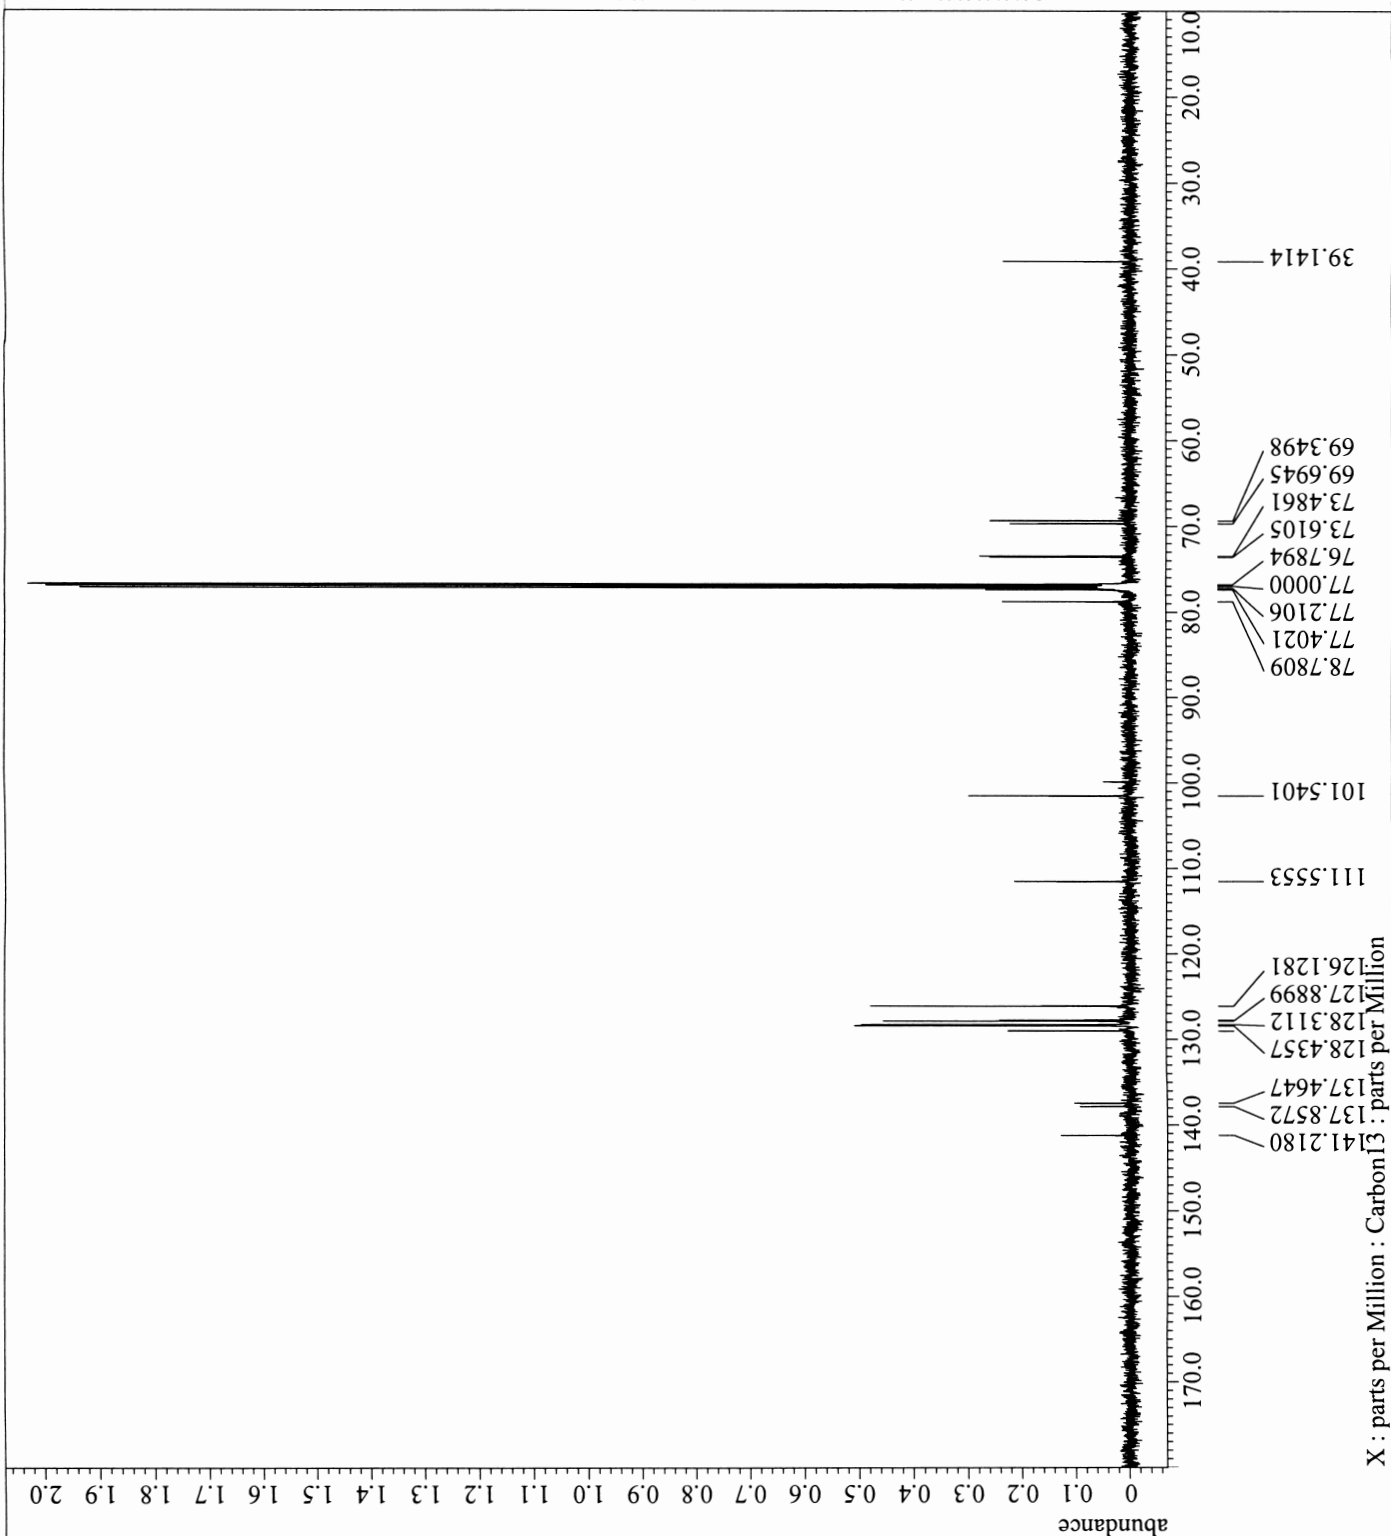

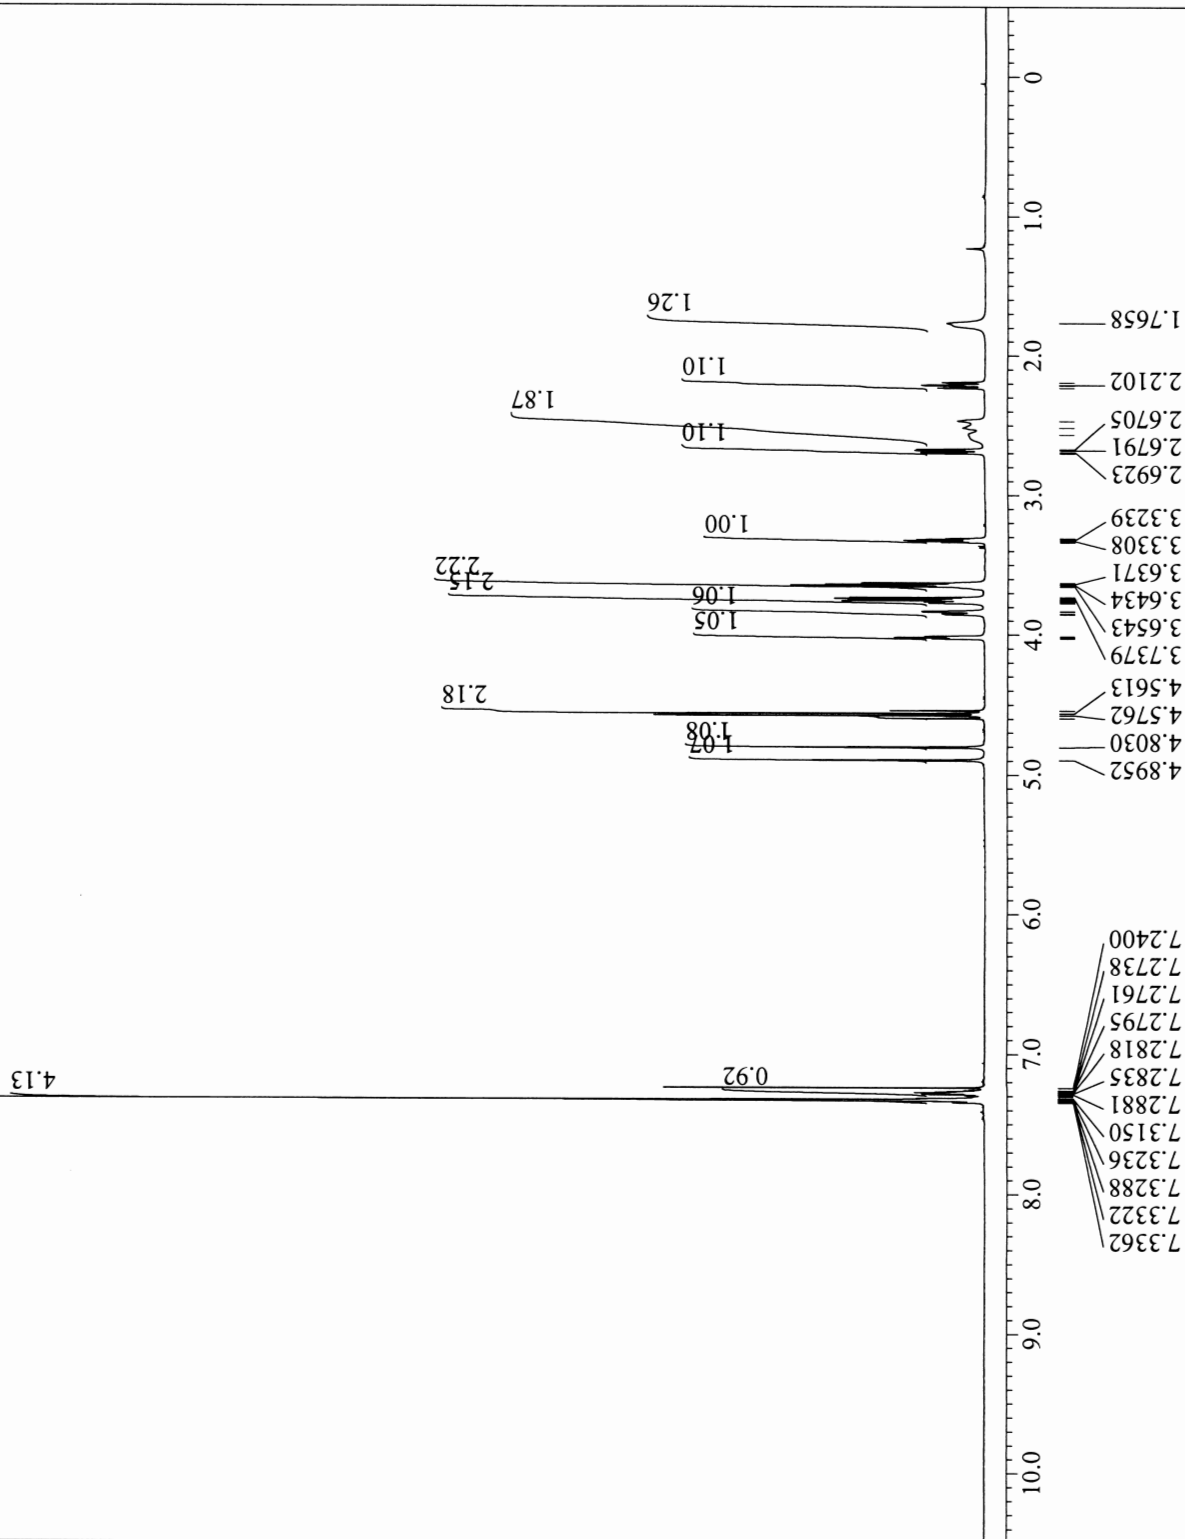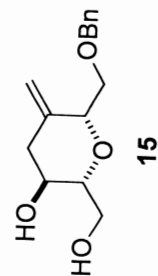

X : parts per Million : Proton : parts per Million



```

Filename = C:\Users\delta\Documents\J
Author = delta
Experiment = carbon.jpg
Sample_Id = MN-I-86
Solvent = CHLOROFORM-D
Creation_Time = 7-OCT-2010 20:11:50
Revision_Time = 7-OCT-2010 20:16:00
Current_Time = 7-OCT-2010 20:16:48

Comment = single pulse decoupled gat
Data_Format = 1D COMPLEX
Dim_Size = 26214
Dim_Title = Carbon13
Dim_Units = [ppm]
Dimensions = X
Site = ECA600
Spectrometer = DELTA2_NMR

Field_Strength = 14.09636928[T] (600[MHz])
X_Acq_Duration = 0.69206016[s]
X_Domain = 13C
X_Freq = 150.91343039[MHz]
X_Offset = 100[ppm]
X_Points = 32768
X_Prescans = 4
X_Resolution = 1.44496109[Hz]
X_Sweep = 47.34848485[kHz]
X_Sweep_Clipped = 37.87878788[kHz]
Irr_Domain = Proton
Irr_Freq = 600.1723046[MHz]
Irr_Offset = 5[ppm]
Clipped = FALSE
Mod_Return = 1
Probe_Recovery = 20[us]
Scans = 77
Total_Scans = 77

X_90_Width = 8.4[us]
X_Acq_Time = 0.69206016[s]
X_Angle = 30[deg]
X_Atn = 6.4[dB]
X_Pulse = 2.8[us]
Irr_Atn_Dec = 18[dB]
Irr_Atn_Noe = 18[dB]
Irr_Noise = WALTZ
Irr_Fwidth = 76[us]
Decoupling = TRUE
Initial_Wait = 1[s]
Noe = TRUE
Noe_Time = 2[s]
Recvr_Gain = 56
Relaxation_Delay = 2[s]
Repetition_Time = 2.69206016[s]
Temp_Get = 22.9[degC]

```

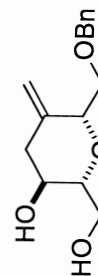

15

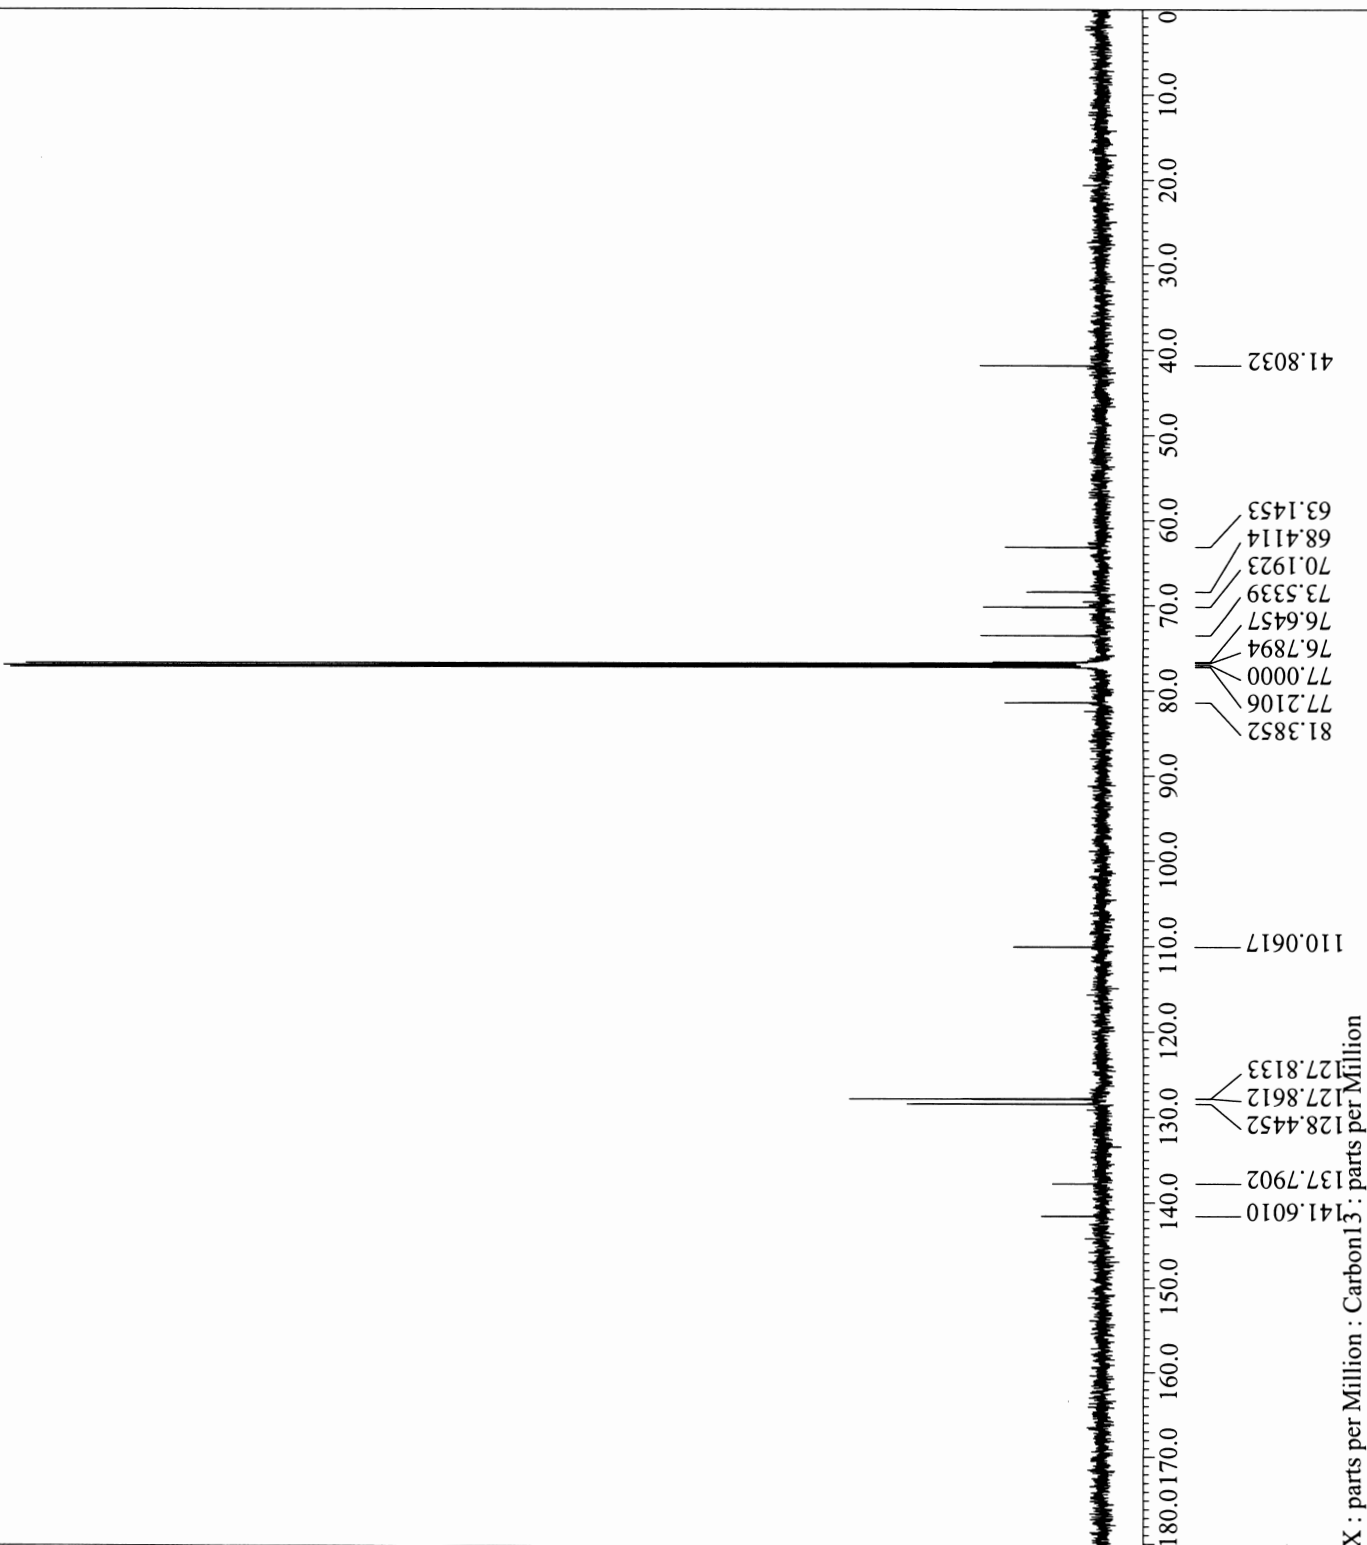

X : parts per Million : Carbon13 : parts per Million

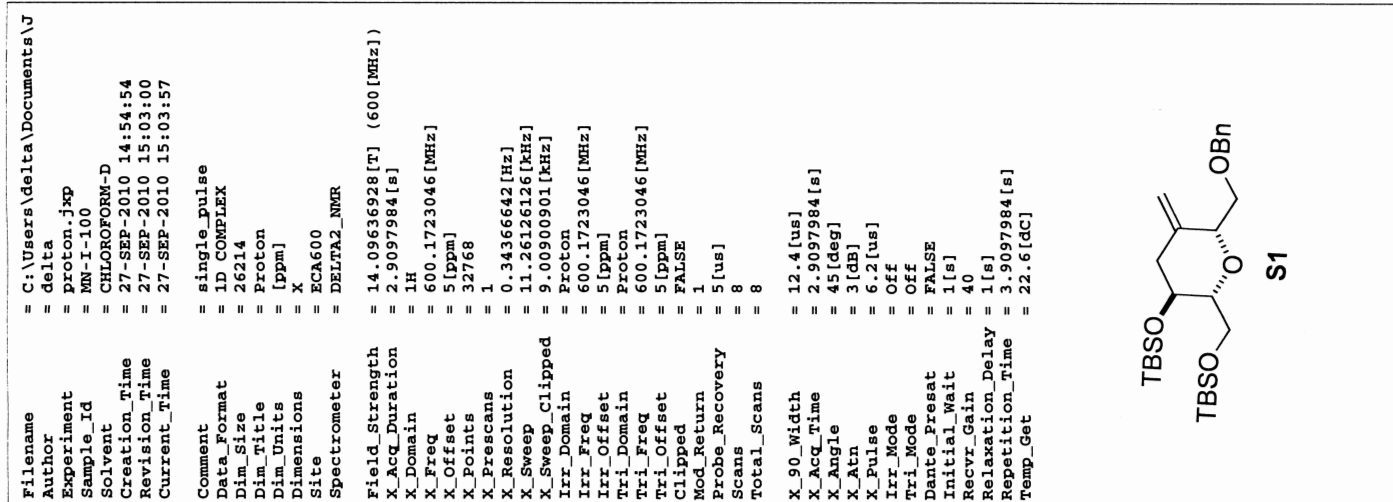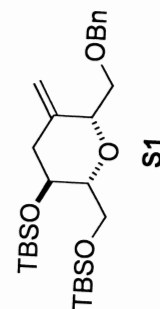

```

Filename = C:\Users\delta\Documents\J
Author = delta
Experiment = carbon-jxp
Sample_Id = MN-I-100
Solvent = CHLOROFORM-D
Creation_Time = 27-SEP-2010 21:09:04
Revision_Time = 27-SEP-2010 21:19:21
Current_Time = 27-SEP-2010 21:20:18

Comment = single pulse decoupled gat
Data_Format = 1D COMPLEX
Dim_Size = 26214
Dim_Title = Carbon13
Dim_Units = [ppm]
Dimensions = X
Site = ECA600
Spectrometer = DELTA2_NMR

Field_Strength = 14.09636928[T] (600[MHz])
X_Acq_Duration = 0.69206016[s]
X_Domain = 13C
X_Freq = 150.91343039[MHz]
X_Offset = 100[ppm]
X_Points = 32768
X_Prescans = 4
X_Resolution = 1.44496109[Hz]
X_Sweep = 47.34848485[kHz]
X_Sweep_Clippped = 37.87878788[kHz]
Irr_Domain = Proton
Irr_Freq = 600.1723046[MHz]
Irr_Offset = 5[ppm]
Clipped = FALSE
Mod_Return = 1
Probe_Recovery = 20[us]
Scans = 181
Total_Scans = 181

X_90_Width = 8.4[us]
X_Acq_Time = 0.69206016[s]
X_Angle = 30[deg]
X_Atn = 6.4[db]
X_Pulse = 2.8[us]
Irr_Atn_Dec = 18[db]
Irr_Atn_Noe = 18[db]
Irr_Noise = WALTZ
Irr_Width = 76[us]
Decoupling = TRUE
Initial_Wait = 1[s]
Noe = TRUE
Noe_Time = 2[s]
Recvr_Gain = 56
Relaxation_Delay = 2[s]
Repetition_Time = 2.69206016[s]
Temp_Get = 23.3[dc]

```

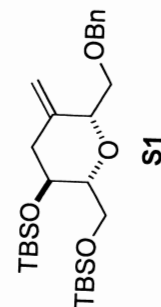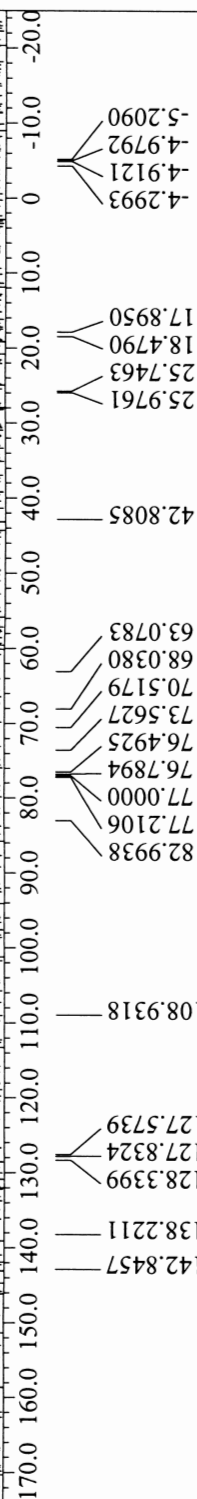

X : parts per Million : Carbon13 : parts per Million

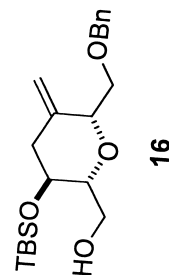

```

Filename      = C:\Users\delta\Documents\J
Author        = delta
Experiment    = carbon.jpg
Sample_Id     = MN-I-104
Solvent       = CHLOROFORM-D
Creation_Time = 27-SEP-2010 21:30:47
Revision_Time = 27-SEP-2010 21:42:20
Current_Time  = 27-SEP-2010 21:43:12

Comment       = single pulse decoupled gat
Data_Format   = 1D COMPLEX
Dim_Size      = 26214
Dim_Title     = Carbon13
Dim_Units     = [ppm]
Dimensions    = X
Site          = ECA600
Spectrometer  = DELTA2_NMR

Field_Strength = 14.09636928[T] (600[MHz])
X_Acq_Duration = 0.69206016[s]
X_Domain       = 13C
X_Freq         = 150.91343039[MHz]
X_Offset       = 100[ppm]
X_Points       = 32768
X_Prescans     = 4
X_Resolution   = 1.44496109[Hz]
X_Sweep        = 47.34848485[kHz]
X_Sweep_Clipped = 37.87878788[kHz]
Irr_Domain     = Proton
Irr_Freq       = 600.1723046[MHz]
Irr_Offset     = 5[ppm]
Clipped        = FALSE
Mod_Return     = 1
Probe_Recovery = 20[us]
Scans          = 240
Total_Scans    = 240

X_90_Width     = 8.4[us]
X_Acq_Time     = 0.69206016[s]
X_Angle        = 30[deg]
X_Atn          = 6.4[dB]
X_Pulse        = 2.8[us]
Irr_Atn_Dec    = 18[dB]
Irr_Atn_Noise  = 18[dB]
Irr_Noise      = WALTZ
Irr_Pwidth     = 76[us]
Decoupling     = TRUE
Initial_Wait    = 1[s]
Noe             = TRUE
Noe_Time       = 2[s]
Recvr_Gain     = 56
Relaxation_Delay = 2[s]
Repetition_Time = 2.69206016[s]
Temp_Get       = 23.1[degC]

```

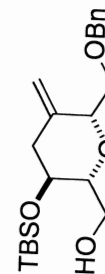

16

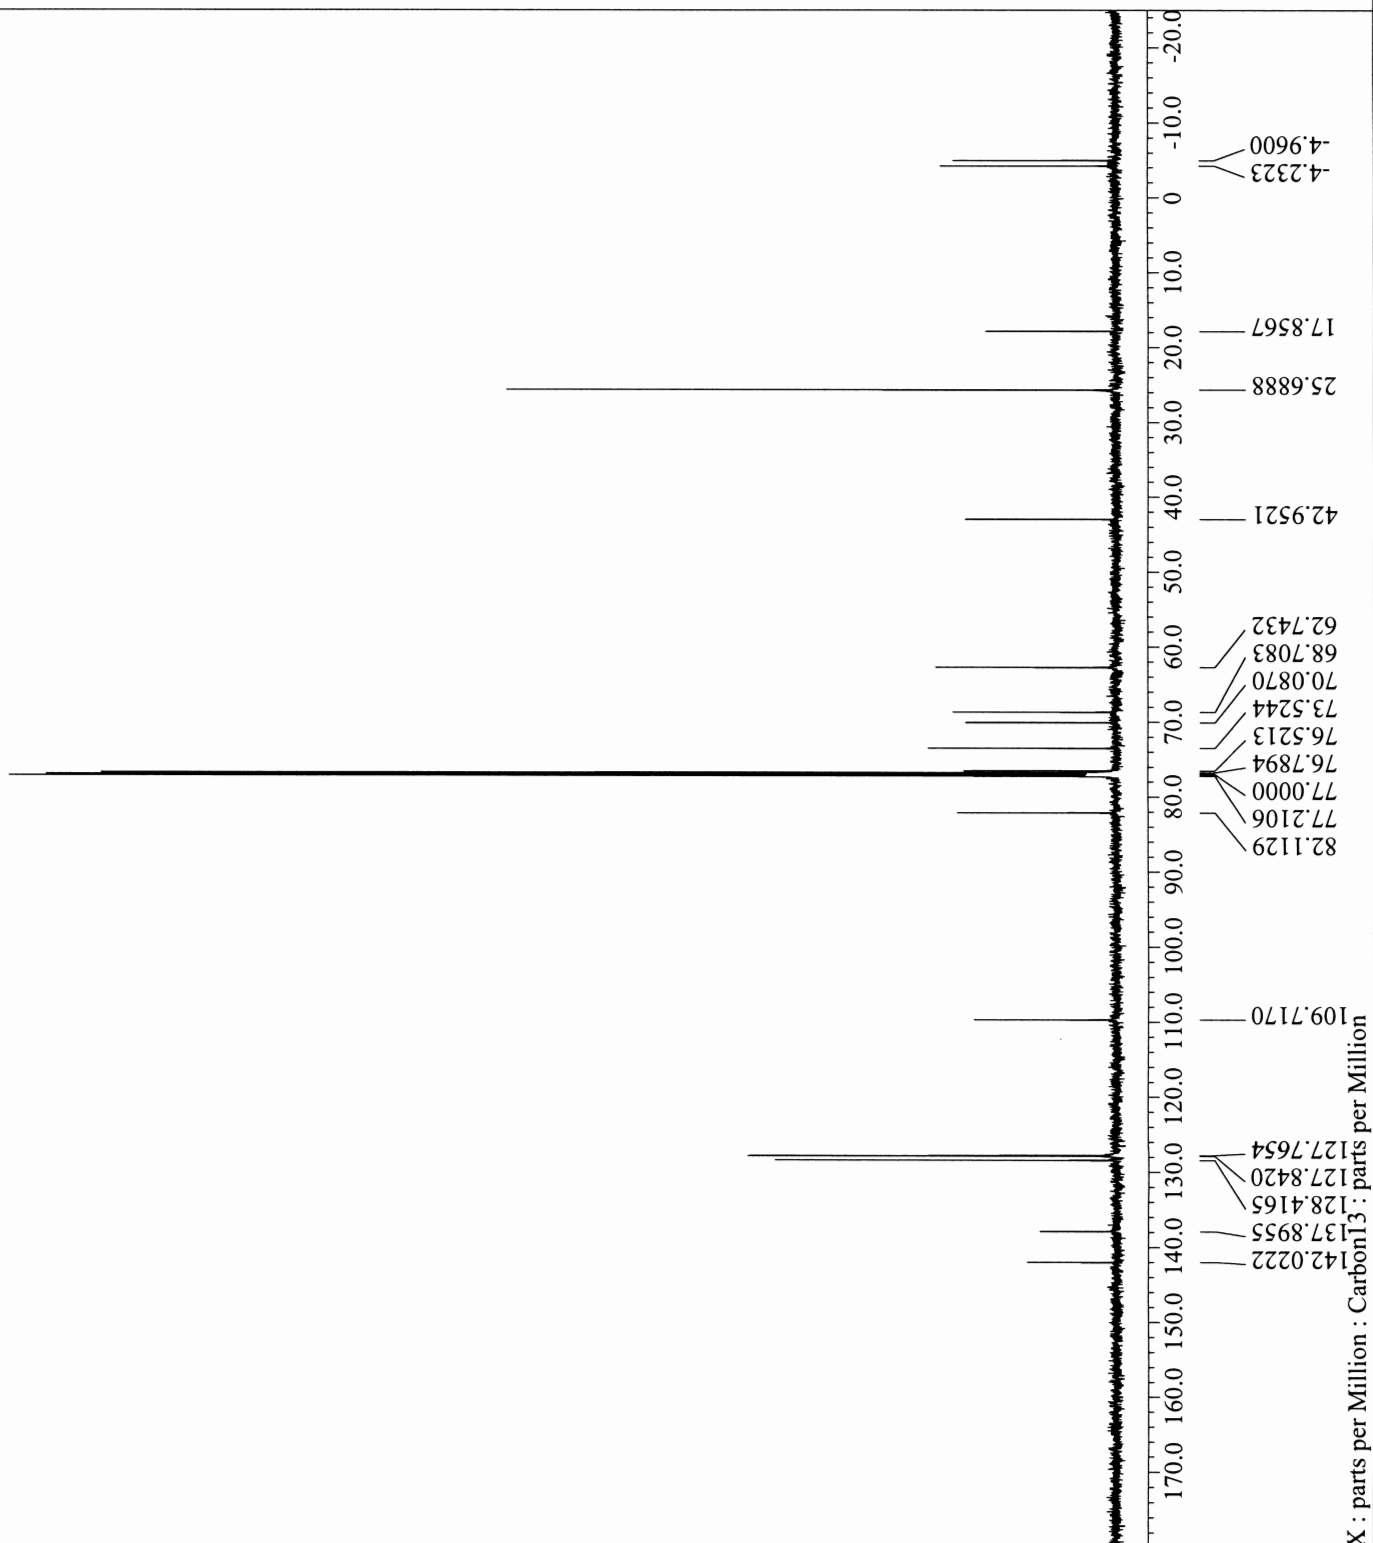

X : parts per Million : Carbon13 : parts per Million

Filename = C:\Users\delta\Documents\J  
 Author = delta  
 Experiment = proton.jpg  
 Sample\_Id = MN-III-104  
 Solvent = CHLOROFORM-D  
 Creation\_time = 4-OCT-2010 21:57:16  
 Revision\_time = 4-OCT-2010 22:02:48  
 Current\_time = 4-OCT-2010 22:03:06  
 Comment = single\_pulse  
 Data\_Format = 1D\_COMPLEX  
 Dim\_Size = 26214  
 Dim\_Title = Proton  
 Dim\_Units = [ppm]  
 Dimensions = x  
 Site = ECA600  
 Spectrometer = DELTA2\_NMR  
 Field\_Strength = 14.09636928[T] (600[MHz])  
 X\_Acq\_Duration = 2.9097984[s]  
 X\_Domain = 1H  
 X\_Freq = 600.1723046[MHz]  
 X\_Offset = 5[ppm]  
 X\_Points = 32768  
 X\_Prescans = 1  
 X\_Resolution = 0.34366642[Hz]  
 X\_Sweep = 11.26126126[kHz]  
 X\_Sweep\_Clipped = 9.00900901[kHz]  
 Irr\_Domain = Proton  
 Irr\_Freq = 600.1723046[MHz]  
 Irr\_Offset = 5[ppm]  
 Tri\_Domain = Proton  
 Tri\_Freq = 600.1723046[MHz]  
 Tri\_Offset = 5[ppm]  
 Clipped = FALSE  
 Mod\_Return = 1  
 Probe\_Recovery = 5[us]  
 Scans = 8  
 Total\_Scans = 8  
 X\_90\_Width = 12.4[us]  
 X\_Acq\_Time = 2.9097984[s]  
 X\_Angle = 45[deg]  
 X\_Atn = 3[dB]  
 X\_Pulse = 6.2[us]  
 Irr\_Mode = Off  
 Tri\_Mode = Off  
 Dante\_Preset = FALSE  
 Initial\_Wait = 1[s]  
 Recvr\_Gain = 44  
 Relaxation\_Delay = 1[s]  
 Repetition\_Time = 3.9097984[s]  
 Temp\_Get = 22.3[dc]

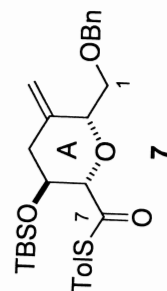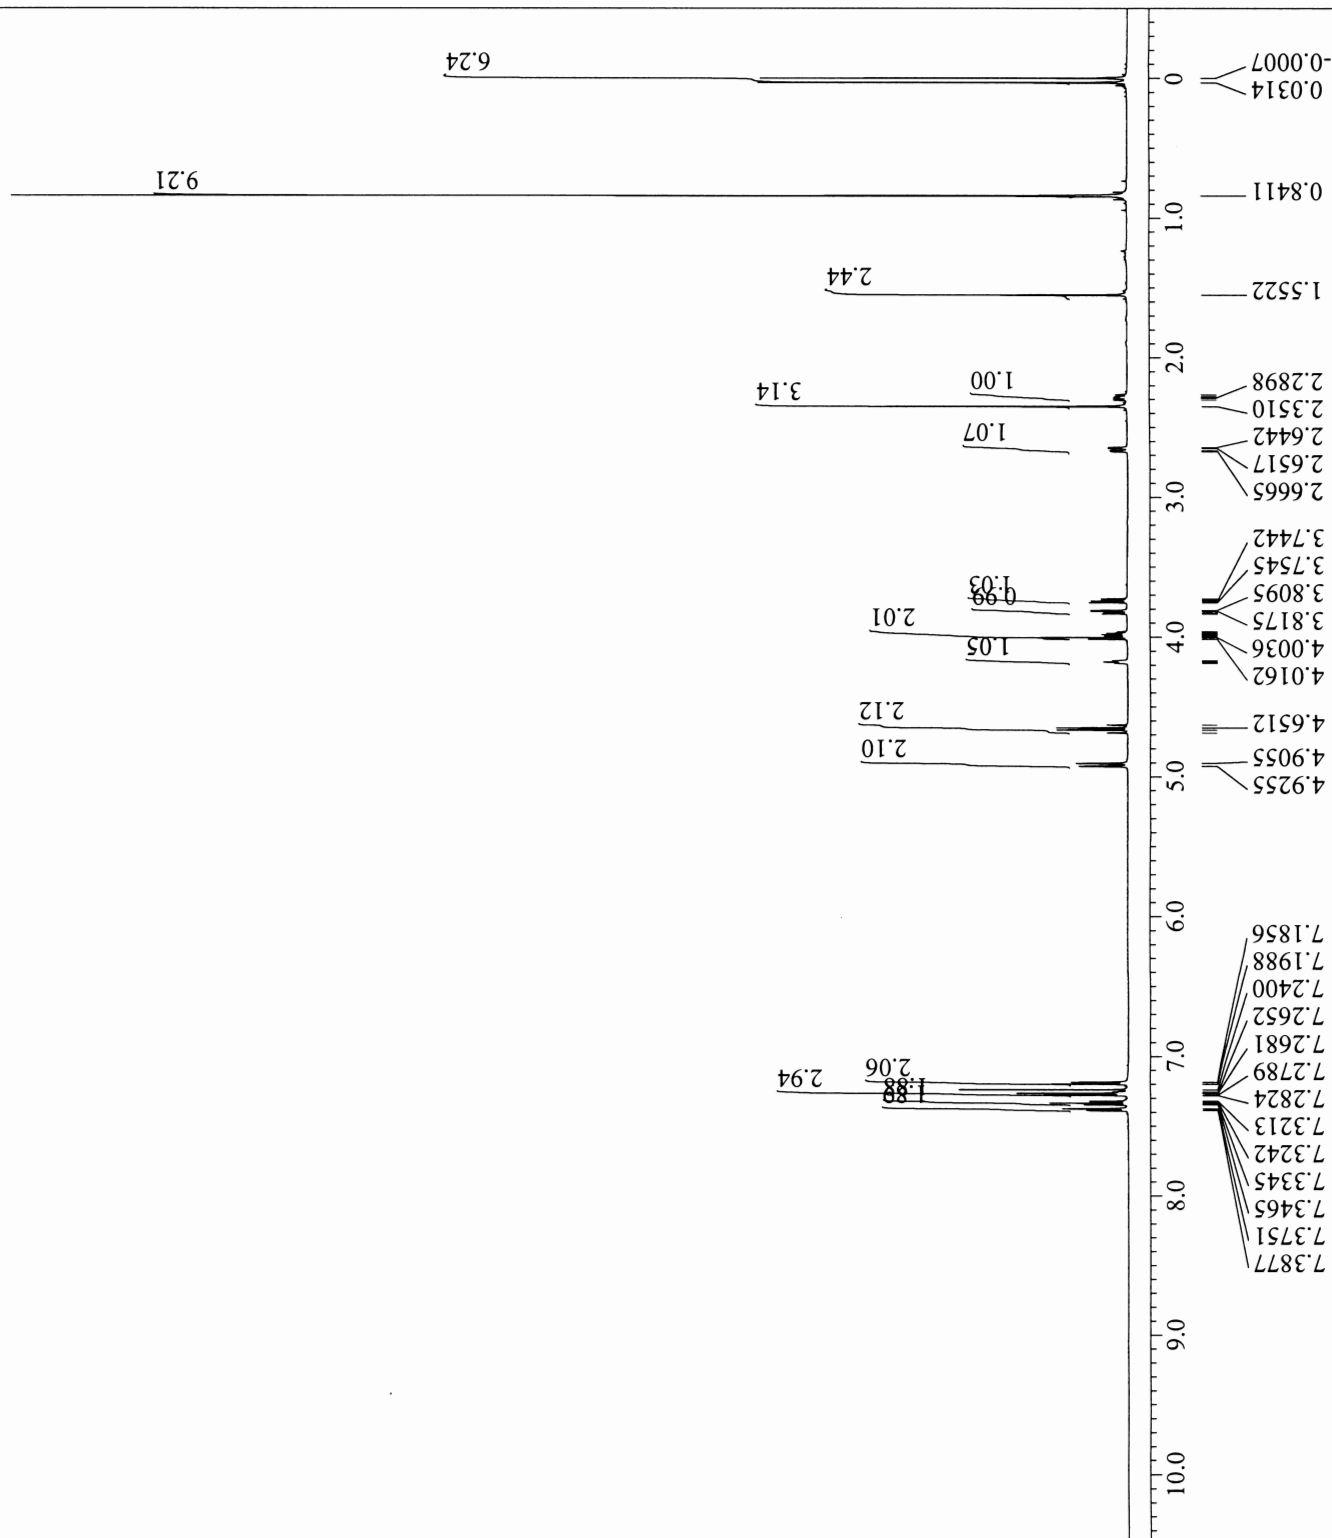

X : parts per Million : Proton : parts per Million

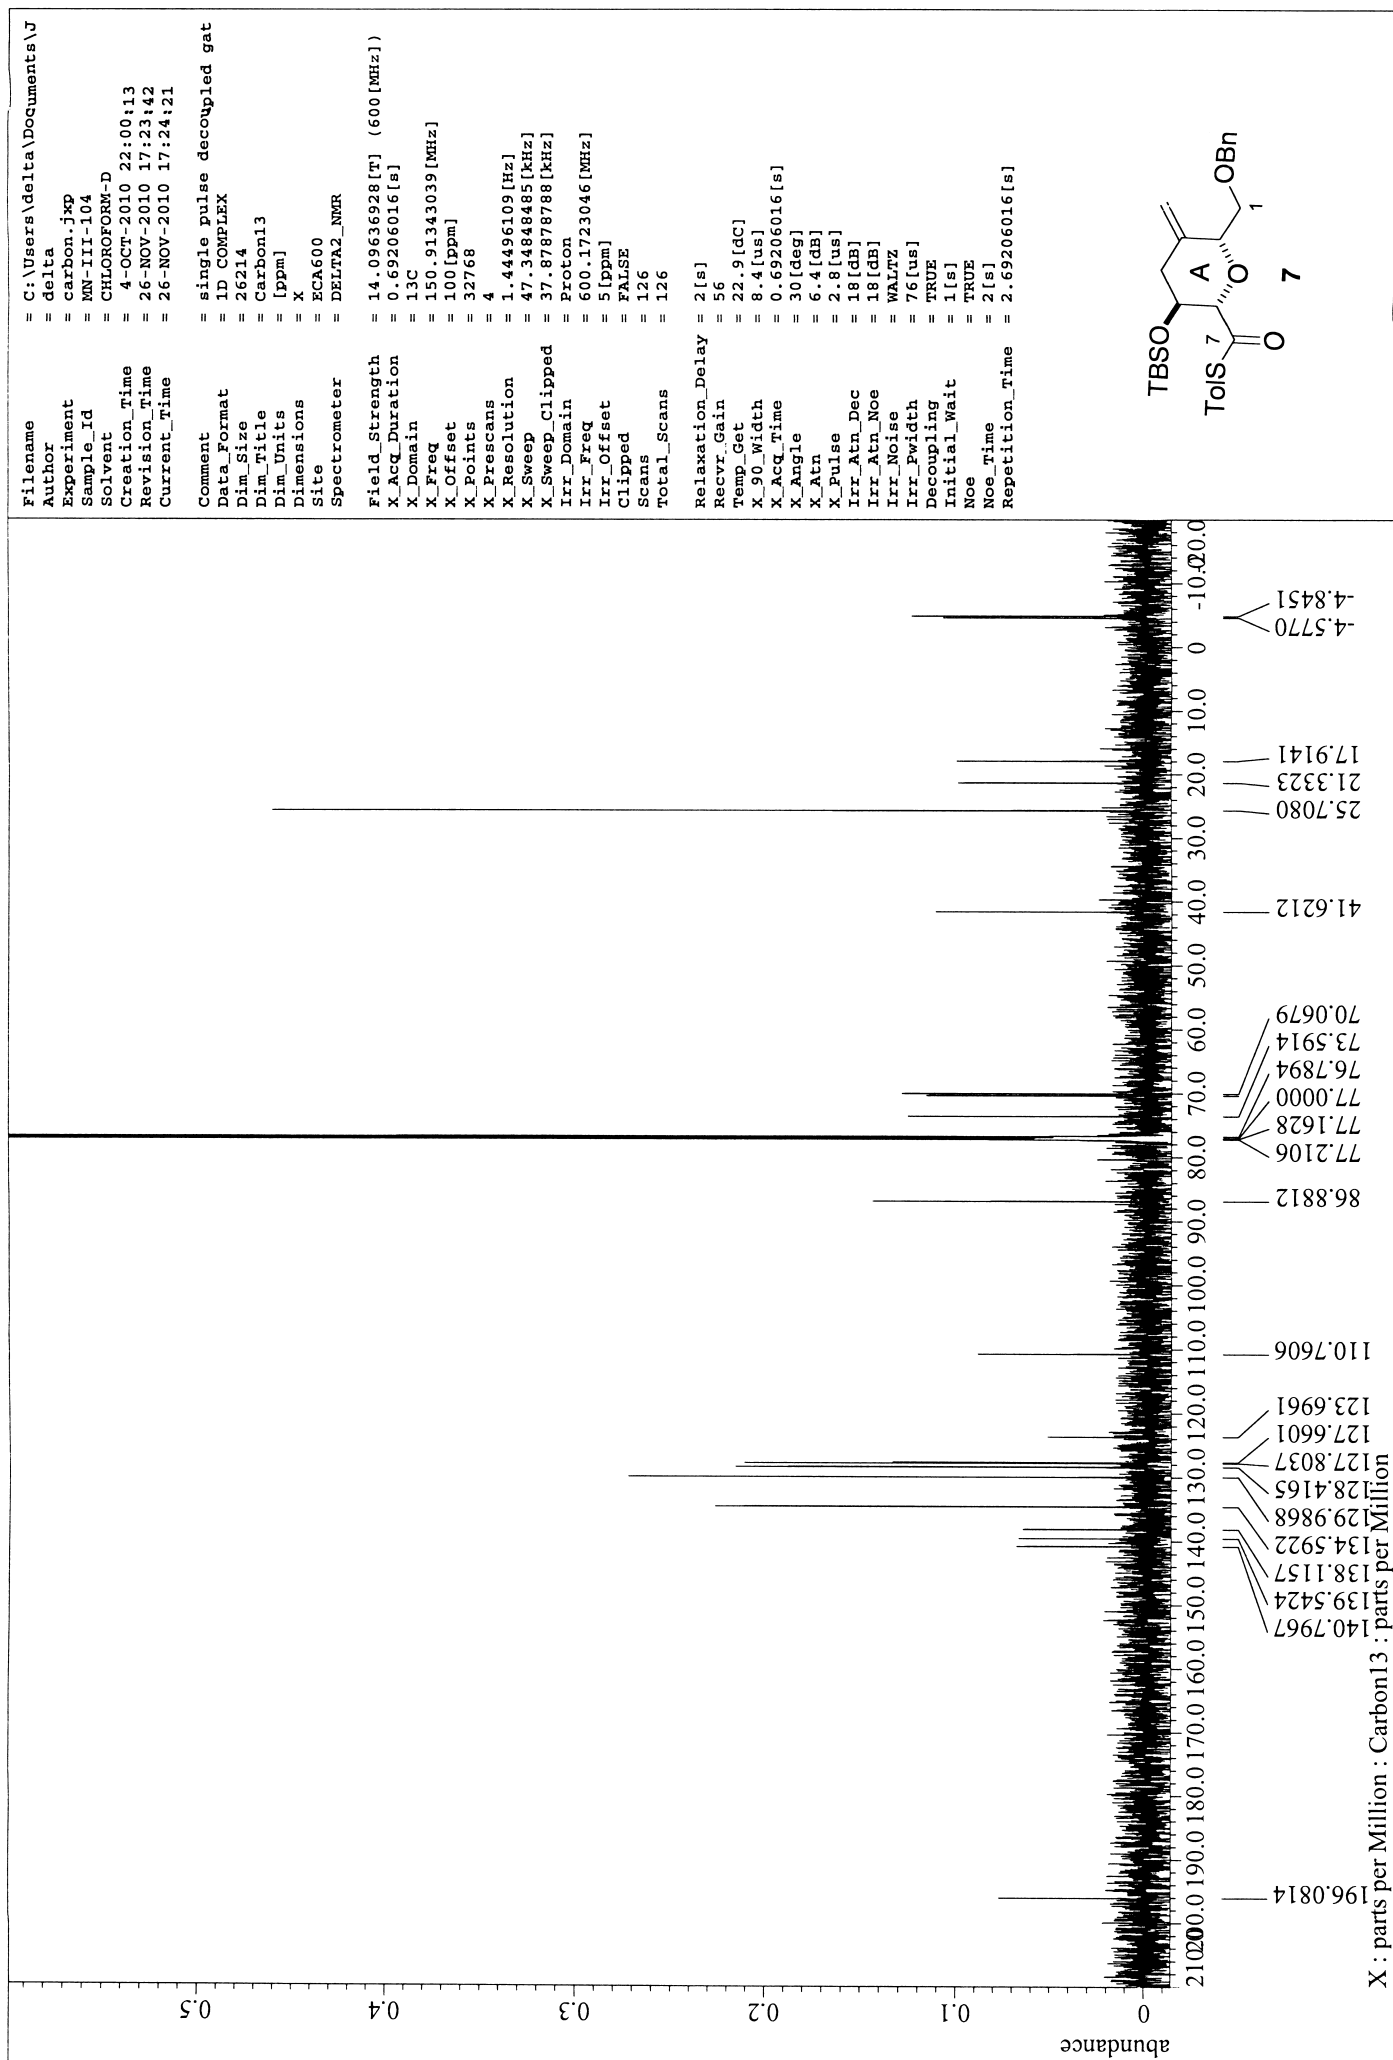

```

Filename = C:\Users\delta\Documents\J
Author = delta
Experiment = proton.jpg
Sample_Id = HI-1-13-2
Solvent = CHLOROFORM-D
Creation_Time = 5-OCT-2010 16:19:27
Revision_Time = 5-OCT-2010 16:26:37
Current_Time = 5-OCT-2010 16:27:09

Comment = single_Pulse
Data_Format = 1D COMPLEX
Dim_Size = 26214
Dim_Title = Proton
Dim_Units = [ppm]
Dimensions = X
Site = ECA600
Spectrometer = DELTA2_NMR

Field_Strength = 14.09636928[T] (600[MHz])
X_Acq_Duration = 2.9097984[s]
X_Domain = 1H
X_Freq = 600.1723046[MHz]
X_Offset = 5[ppm]
X_Points = 32768
X_Prescans = 1
X_Resolution = 0.34366642[Hz]
X_Sweep = 11.26126126[kHz]
X_Sweep_Clippped = 9.00900901[kHz]
Irr_Domain = Proton
Irr_Freq = 600.1723046[MHz]
Irr_Offset = 5[ppm]
Tri_Domain = Proton
Tri_Freq = 600.1723046[MHz]
Tri_Offset = 5[ppm]
Clipped = FALSE
Mod_Return = 1
Probe_Recovery = 5[us]
Scans = 8
Total_Scans = 8

X_90_Width = 12.4[us]
X_Acq_Time = 2.9097984[s]
X_Angle = 45[deg]
X_Atn = 3[db]
X_Pulse = 6.2[us]
Irr_Mode = Off
Tri_Mode = Off
Dante_Preset = FALSE
Initial_Wait = 1[s]
Recvr_Gain = 40
Relaxation_Delay = 1[s]
Repetition_Time = 3.9097984[s]
Temp_Get = 22.1[dc]

```

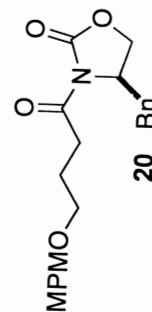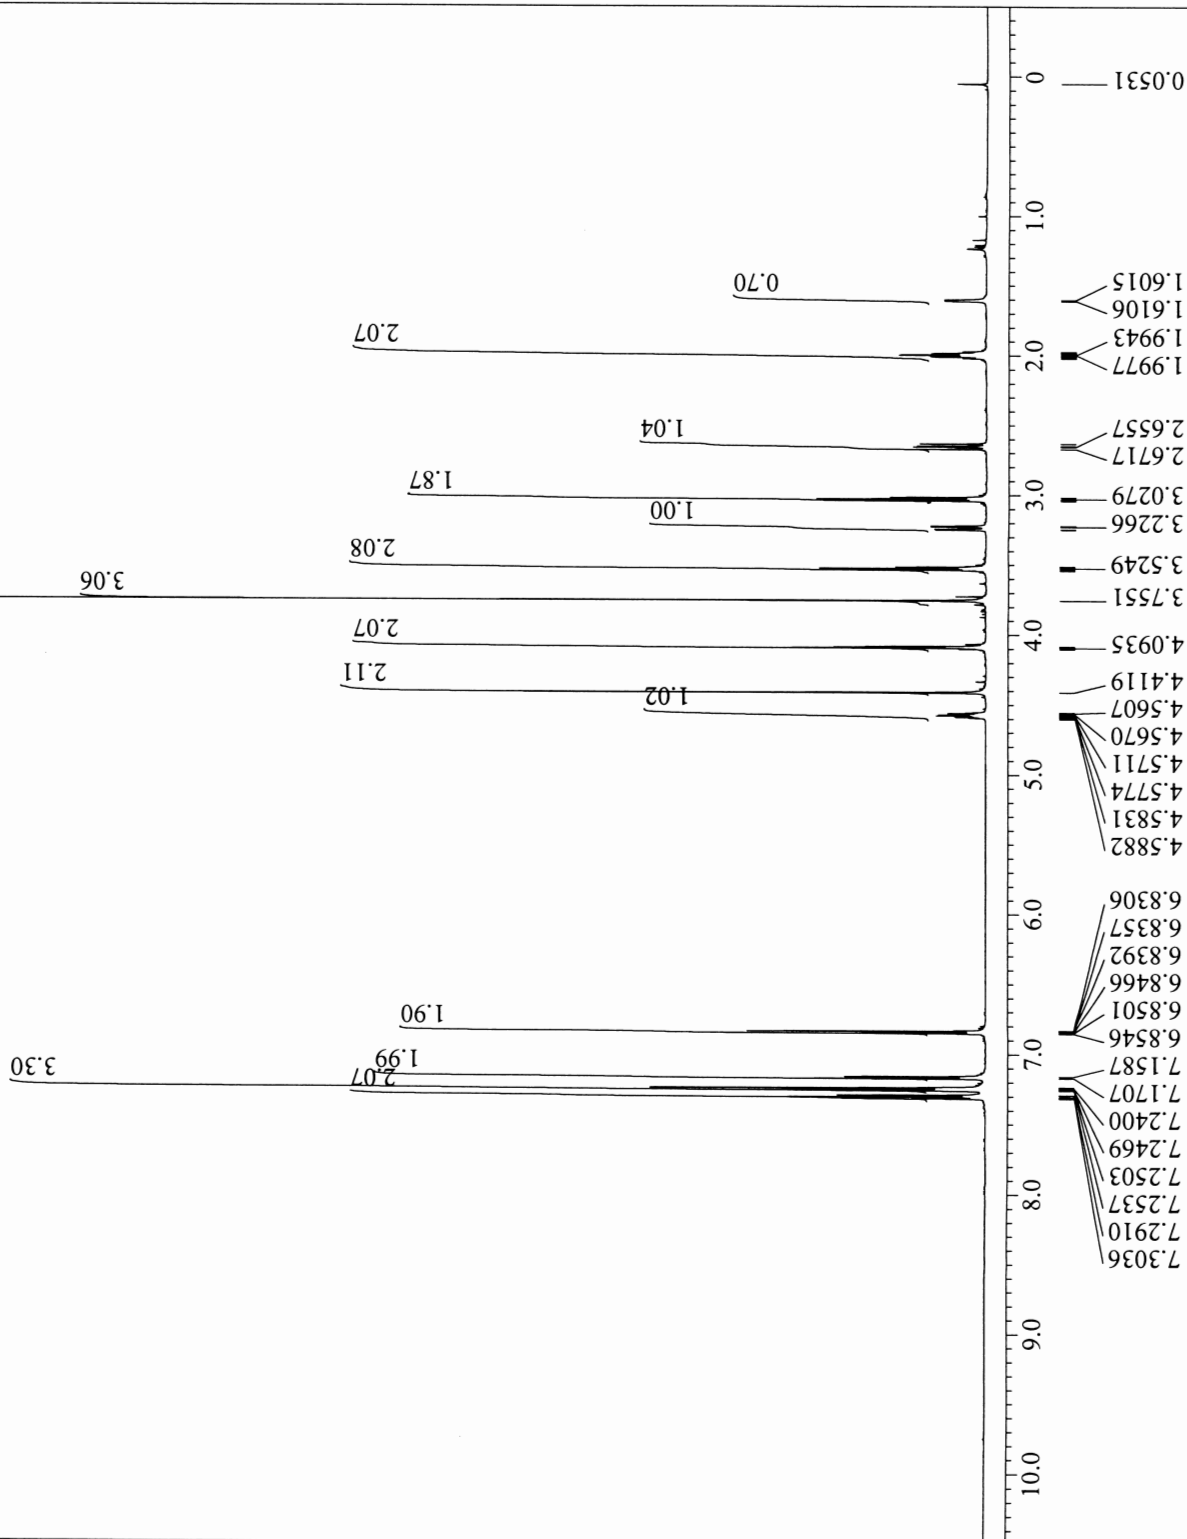

X : parts per Million : Proton : parts per Million



```

Filename = C:\Users\delta\Documents\J
Author = delta
Experiment = carbon.jsp
Sample_Id = HI-1-13-2
Solvent = CHLOROFORM-D
Creation_Time = 5-OCT-2010 20:22:04
Revision_Time = 5-OCT-2010 20:30:05
Current_Time = 5-OCT-2010 20:30:52

Comment = single pulse decoupled gat
Data_Format = 1D COMPLEX
Dim_Size = 26214
Dim_Title = Carbon13
Dim_Units = [ppm]
Dimensions = X
Site = ECA600
Spectrometer = DELTA2_NMR

Field_Strength = 14.09636928[T] (600[MHz])
X_Acq_Duration = 0.69206016[s]
X_Domain = 13C
X_Freq = 150.91343039[MHz]
X_Offset = 100[ppm]
X_Points = 32768
X_Prescans = 4
X_Resolution = 1.44496109[Hz]
X_Sweep = 47.34848485[kHz]
X_Sweep_Clippped = 37.87878788[kHz]
Irr_Domain = Proton
Irr_Freq = 600.1723046[MHz]
Irr_Offset = 5[ppm]
Clipped = FALSE
Mod_Return = 1
Probe_Recovery = 20[us]
Scans = 145
Total_Scans = 145

X_90_Width = 8.4[us]
X_Acq_Time = 0.69206016[s]
X_Angle = 30[deg]
X_Atn = 6.4[dB]
X_Pulse = 2.8[us]
Irr_Atn_Dec = 18[dB]
Irr_Atn_Noie = 18[dB]
Irr_Noie = WALTZ
Irr_Fwidth = 76[us]
Decoupling = TRUE
Initial_Wait = 1[s]
Noe = TRUE
Noe_Time = 2[s]
Recvr_Gain = 56
Relaxation_Delay = 2[s]
Repetition_Time = 2.69206016[s]
Temp_Get = 23.1[dc]

```

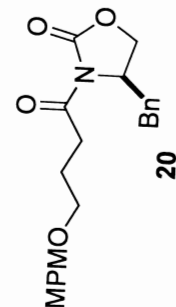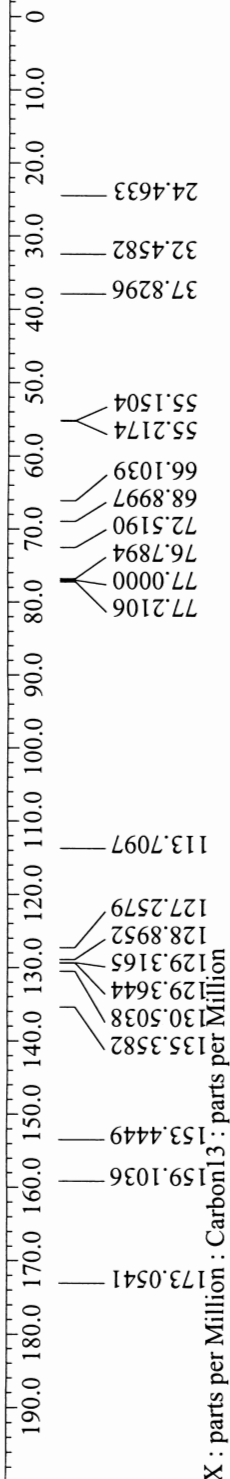

Filename = C:\Users\delta\Documents\J  
 Author = Delta  
 Experiment = proton.jpg  
 Sample\_Id = HI-I-13-1  
 Solvent = CHLOROFORM-D  
 Creation\_Time = 5-OCT-2010 16:10:14  
 Revision\_Time = 5-OCT-2010 16:17:58  
 Current\_Time = 5-OCT-2010 16:18:34  
 Comment = single\_pulse  
 Data\_Format = 1D COMPLEX  
 Dim\_Size = 26214  
 Dim\_Title = Proton  
 Dim\_Units = [ppm]  
 Dimensions = X  
 Site = ECA600  
 Spectrometer = DELTA2\_NMR  
 Field\_Strength = 14.09636928[T] (600[MHz])  
 X\_Acq\_Duration = 2.9097984[s]  
 X\_Domain = 1H  
 X\_Freq = 600.1723046[MHz]  
 X\_Offset = 5[ppm]  
 X\_Points = 32768  
 X\_Prescans = 1  
 X\_Resolution = 0.34366642[Hz]  
 X\_Sweep = 11.26126126[kHz]  
 X\_Sweep\_Clippped = 9.00900901[kHz]  
 Irr\_Domain = Proton  
 Irr\_Freq = 600.1723046[MHz]  
 Irr\_Offset = 5[ppm]  
 Tri\_Domain = Proton  
 Tri\_Freq = 600.1723046[MHz]  
 Tri\_Offset = 5[ppm]  
 Clipped = FALSE  
 Mod\_Return = 1  
 Probe\_Recovery = 5[us]  
 Scans = 8  
 Total\_Scans = 8  
 X\_90\_Width = 12.4[us]  
 X\_Acq\_Time = 2.9097984[s]  
 X\_Angle = 45[deg]  
 X\_Atn = 3[dB]  
 X\_Pulse = 6.2[us]  
 Irr\_Mode = Off  
 Tri\_Mode = Off  
 Dante\_Presat = FALSE  
 Initial\_Wait = 1[s]  
 Recvr\_Gain = 42  
 Relaxation\_Delay = 1[s]  
 Repetition\_Time = 3.9097984[s]  
 Temp\_Get = 22.2[dc]

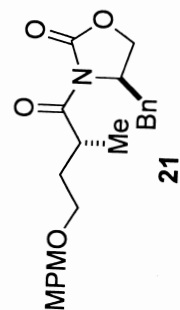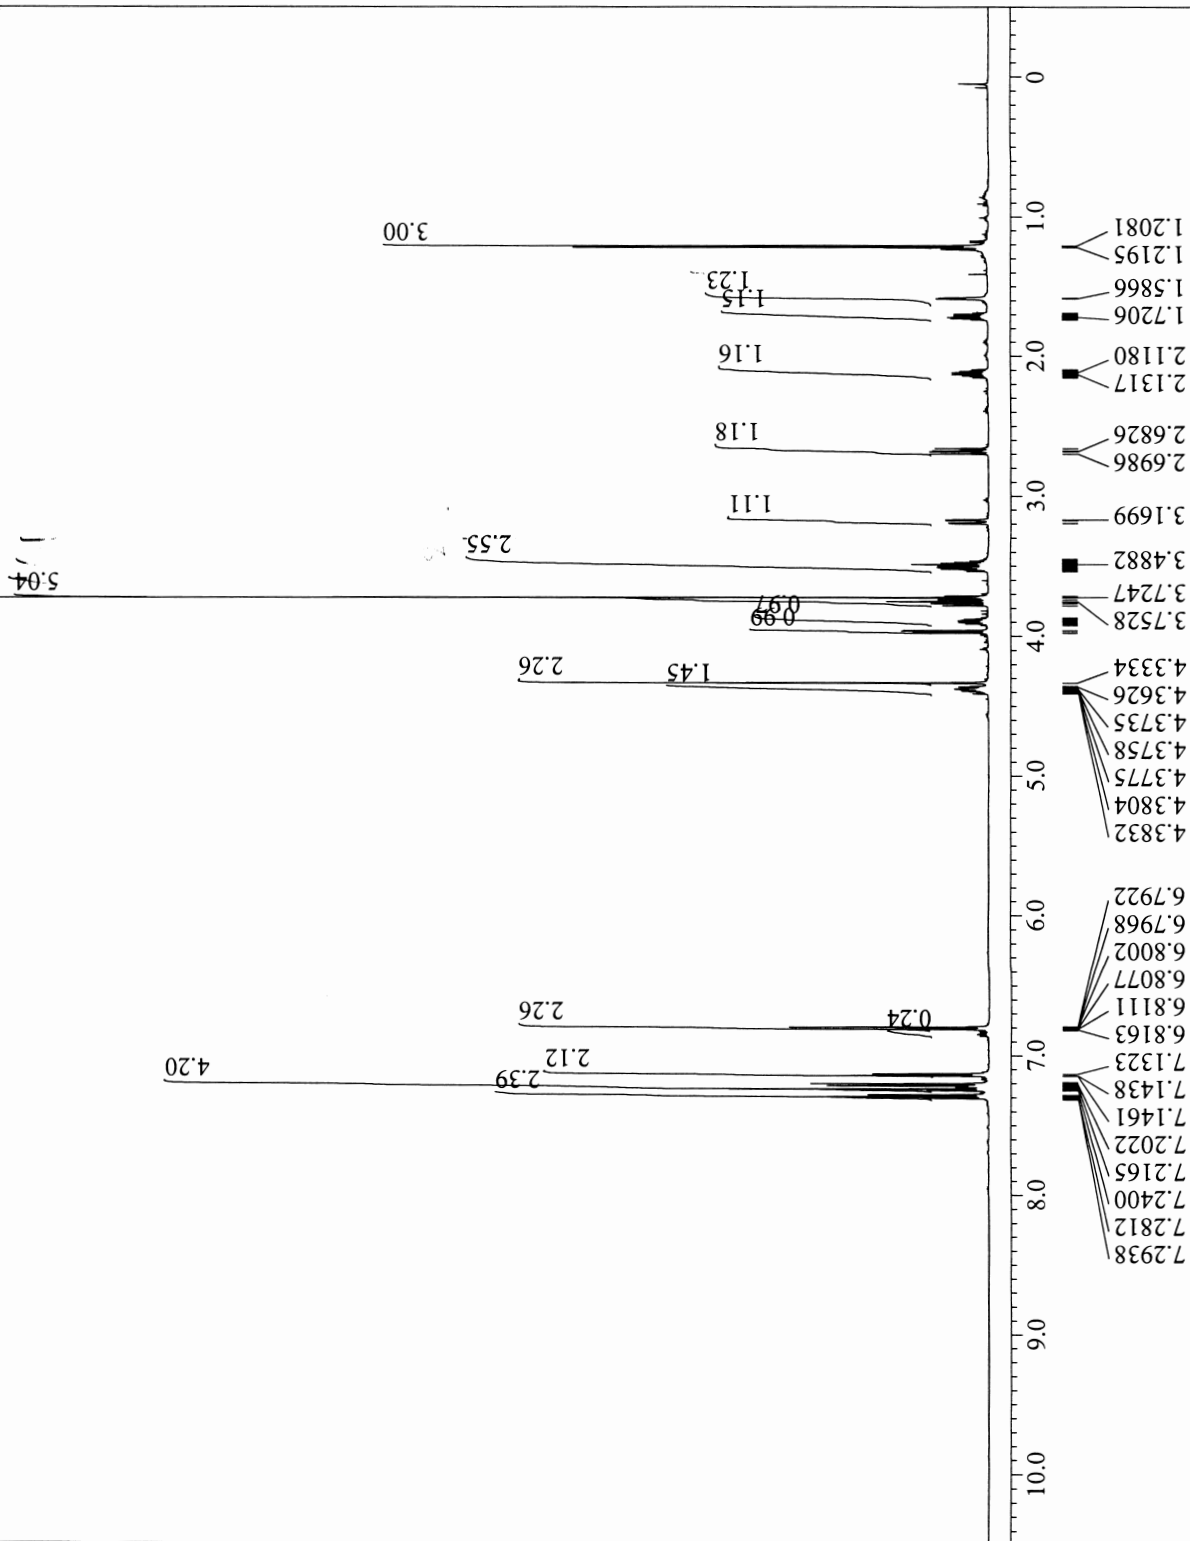

X : parts per Million : Proton : parts per Million

```

Filename = C:\Users\delta\Documents\J
Author = delta
Experiment = carbon.jpg
Sample_Id = HI-1-13-1
Solvent = CHLOROFORM-D
Creation_Time = 5-OCT-2010 20:10:35
Revision_Time = 5-OCT-2010 20:15:22
Current_Time = 5-OCT-2010 20:17:14

Comment = single pulse decoupled gat
Data_Format = 1D COMPLEX
Dim_Size = 26214
Dim_Title = Carbon13
Dim_Units = [ppm]
Dimensions = X
Site = ECA600
Spectrometer = DELTA2_NMR

Field_Strength = 14.09636928[T] (600[MHz])
X_Acq_Duration = 0.69206016[s]
X_Domain = 13C
X_Freq = 150.91343039[MHz]
X_Offset = 100[ppm]
X_Points = 32768
X_Prescans = 4
X_Resolution = 1.44496109[Hz]
X_Sweep = 47.34848485[kHz]
X_Sweep_Clippped = 37.87878788[kHz]
Irr_Domain = Proton
Irr_Freq = 600.1723046[MHz]
Irr_Offset = 5[ppm]
Clipped = TRUE
Mod_Return = 1
Probe_Recovery = 20[us]
Scans = 72
Total_Scans = 72

X_90_Width = 8.4[us]
X_Acq_Time = 0.69206016[s]
X_Angle = 30[deg]
X_Atn = 6.4[db]
X_Pulse = 2.8[us]
Irr_Atn_Dec = 18[db]
Irr_Atn_Noe = 18[db]
Irr_Noise = WALTZ
Irr_Pwidth = 76[us]
Decoupling = TRUE
Initial_Wait = 1[s]
Noe = TRUE
Noe_Time = 2[s]
Recvr_Gain = 58
Relaxation_Delay = 2[s]
Repetition_Time = 2.69206016[s]
Temp_Get = 22.8[dc]

```

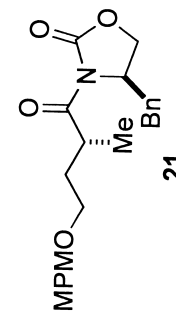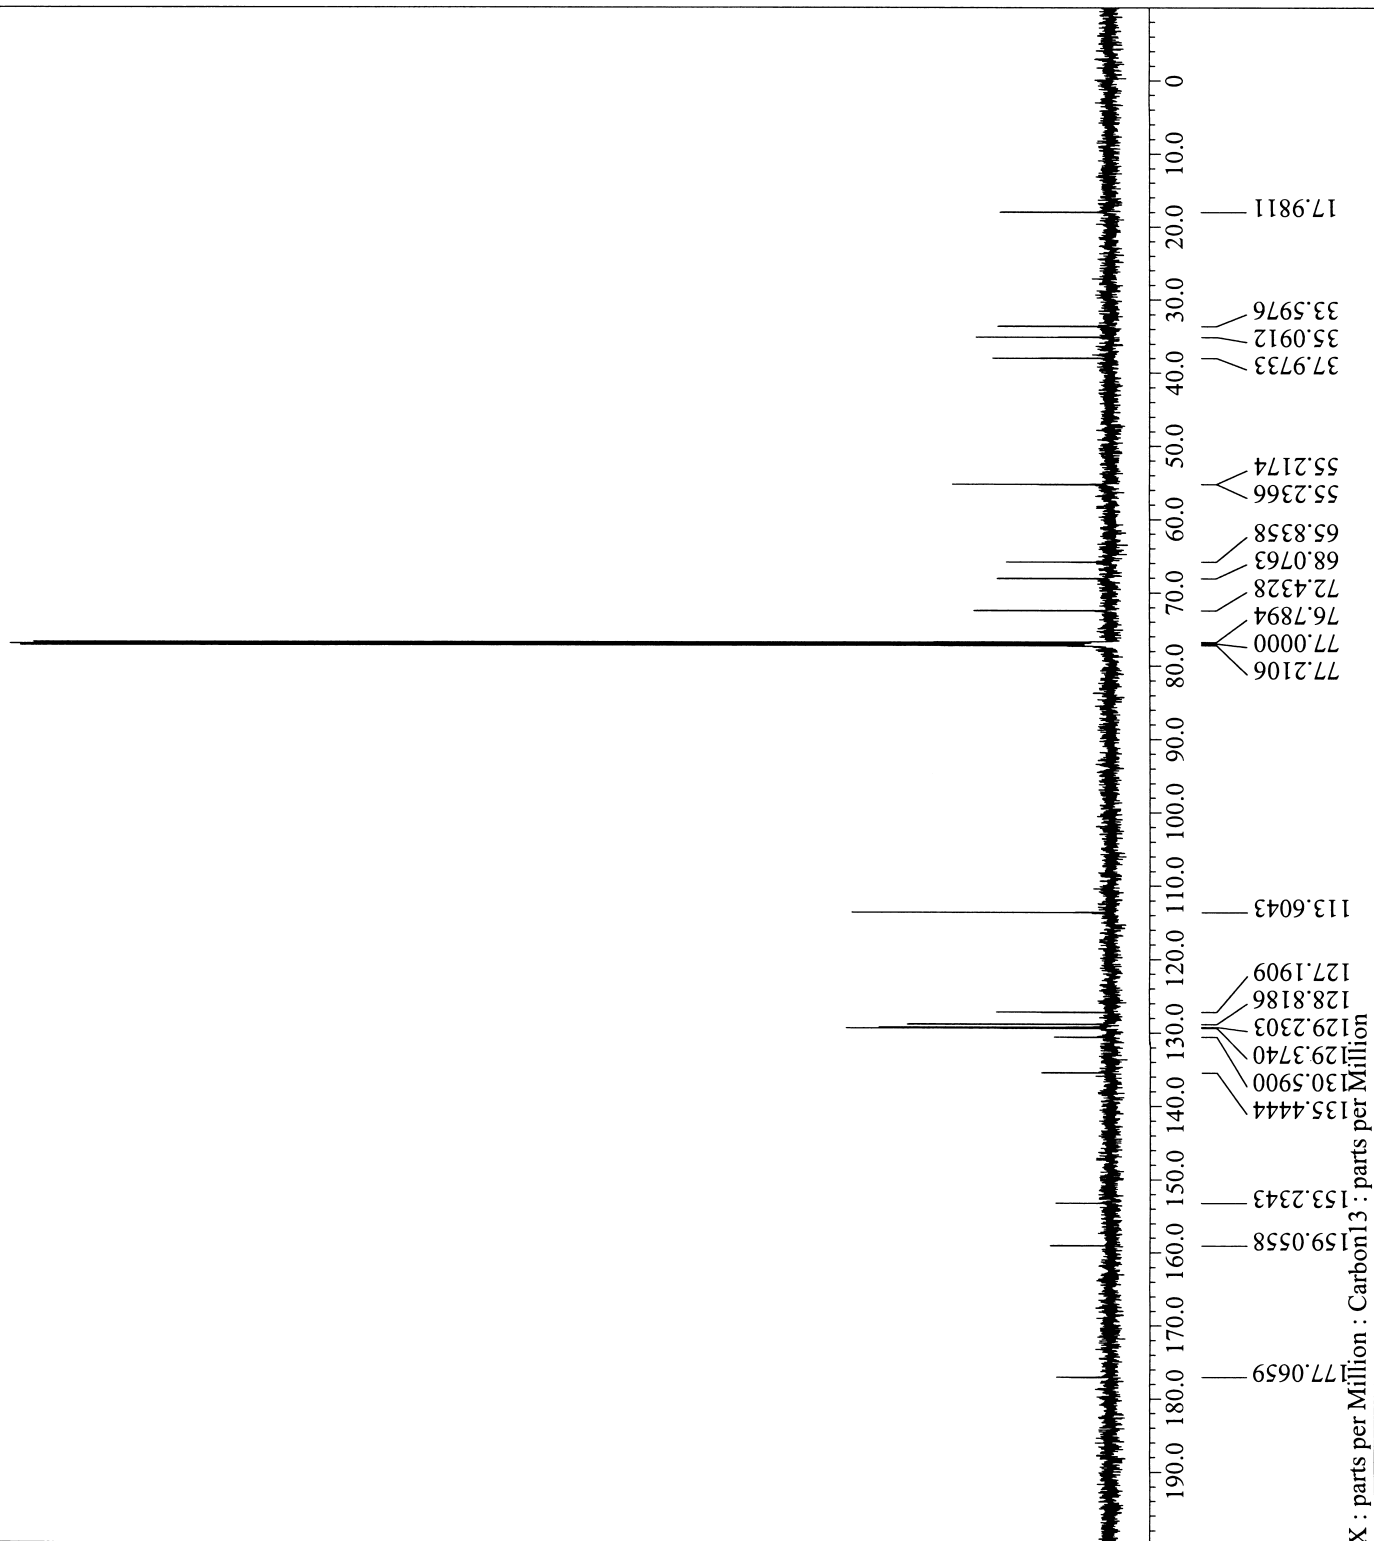

```

Filename = C:\Users\delta\Documents\J
Author = delta
Experiment = proton.jpg
Sample_Id = MN-III-81
Solvent = CHLOROFORM-D
Creation_Time = 7-OCT-2010 19:36:22
Revision_Time = 7-OCT-2010 19:42:38
Current_Time = 7-OCT-2010 19:43:03

Comment = single_pulse
Data_Format = 1D COMPLEX
Dim_Size = 26214
Dim_Title = Proton
Dim_Units = [ppm]
Dimensions = X
Site = ECA600
Spectrometer = DELTA2_NMR

Field_Strength = 14.09636928[T] (600[MHz])
X_Acq_Duration = 2.9097984[s]
X_Domain = 1H
X_Freq = 600.1723046[MHz]
X_Offset = 5[ppm]
X_Points = 32768
X_Prescans = 1
X_Resolution = 0.34366642[Hz]
X_Sweep = 11.26126126[kHz]
X_Sweep_Clipped = 9.00900901[kHz]
Irr_Domain = Proton
Irr_Freq = 600.1723046[MHz]
Irr_Offset = 5[ppm]
Tri_Domain = Proton
Tri_Freq = 600.1723046[MHz]
Tri_Offset = 5[ppm]
Clipped = FALSE
Mod_Return = 1
Probe_Recovery = 5[us]
Scans = 8
Total_Scans = 8

X_90_Width = 12.4[us]
X_Acq_Time = 2.9097984[s]
X_Angle = 45[deg]
X_Atn = 3[db]
X_Pulse = 6.2[us]
Irr_Mode = Off
Tri_Mode = Off
Dante_Presat = FALSE
Initial_Wait = 1[s]
Recvr_Gain = 40
Relaxation_Delay = 1[s]
Repetition_Time = 3.9097984[s]
Temp_Get = 22.6[dc]

```

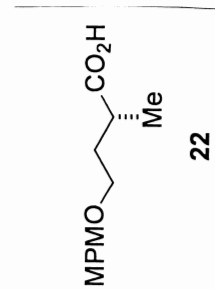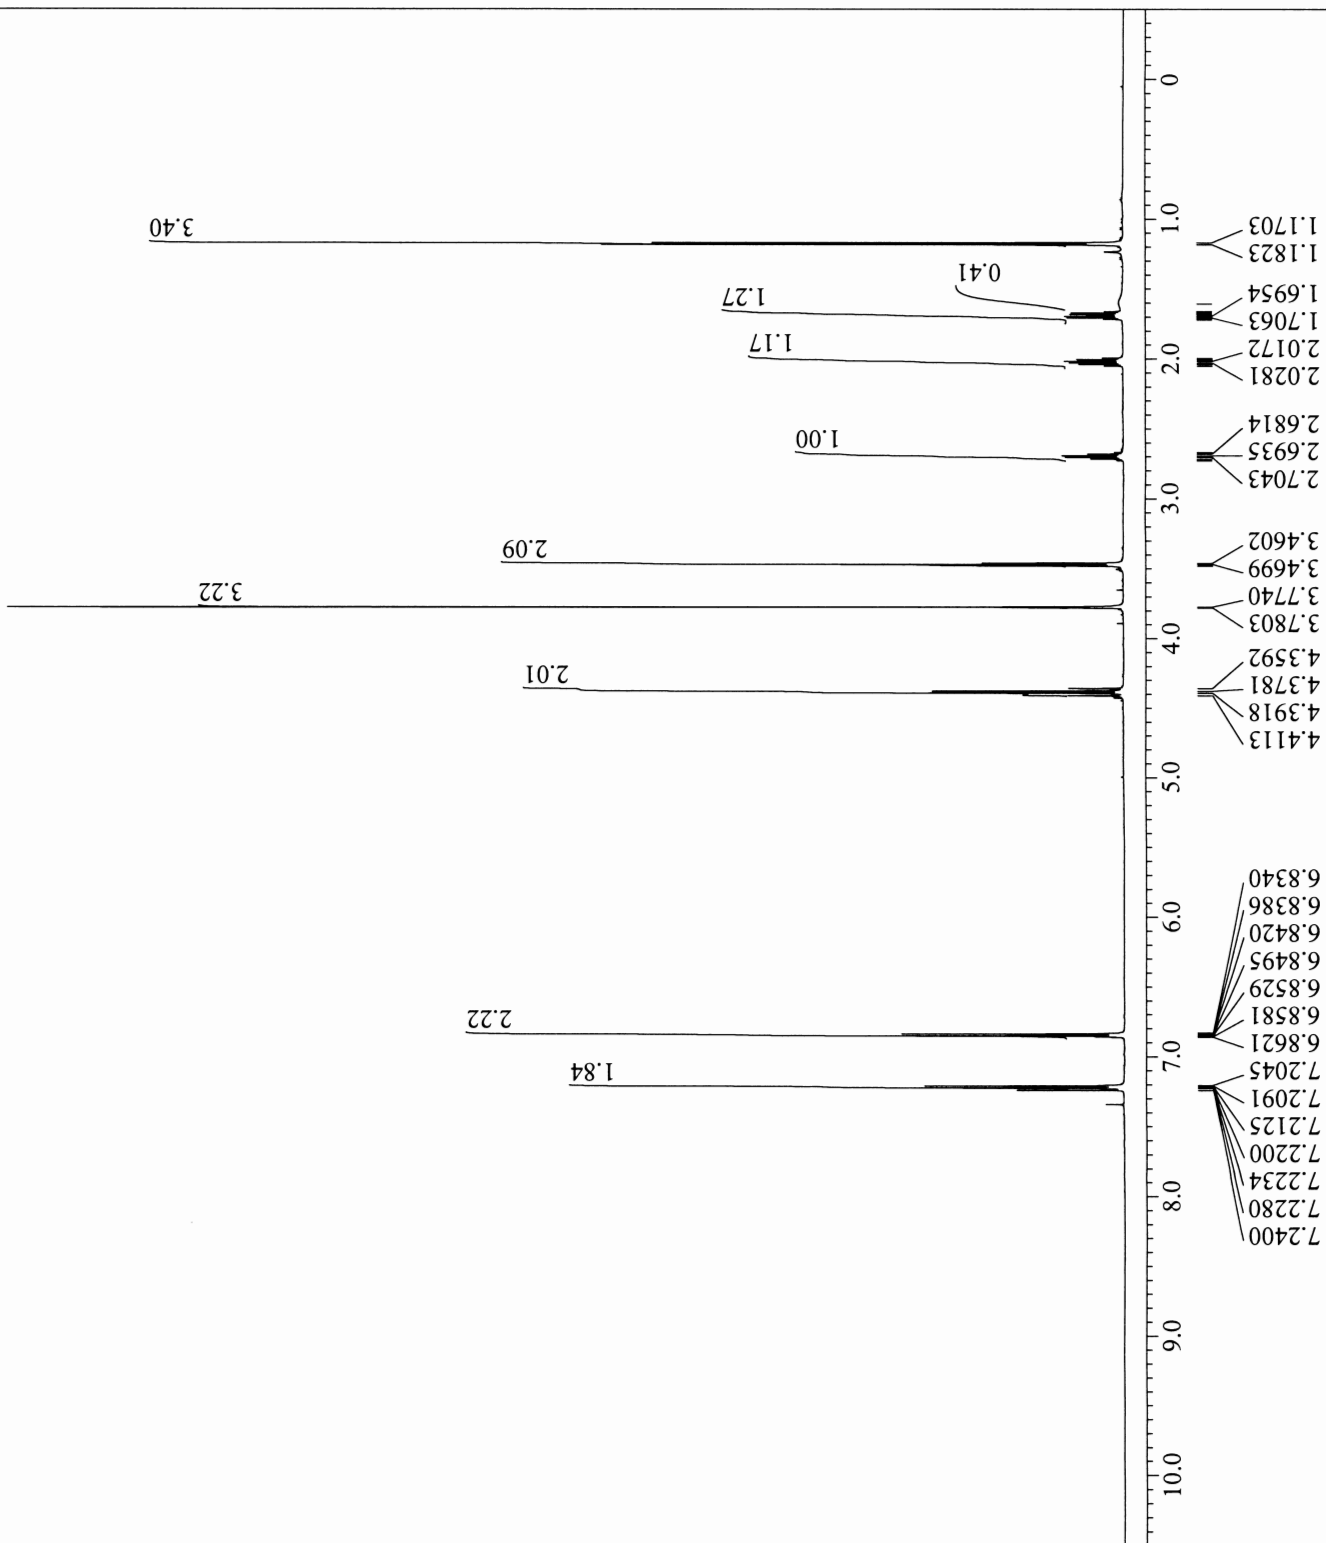

X : parts per Million : Proton : parts per Million

Filename = C:\Users\delta\Documents\J  
 Author = delta  
 Experiment = carbon.jxp  
 Sample\_Id = MN-III-81  
 Solvent = CHLOROFORM-D  
 Creation\_Time = 7-OCT-2010 19:39:16  
 Revision\_Time = 7-OCT-2010 19:46:48  
 Current\_Time = 7-OCT-2010 19:47:23  
 Comment = single pulse decoupled gat  
 Data\_Format = 1D COMPLEX  
 Dim\_Size = 26214  
 Dim\_Title = Carbon13  
 Dim\_Units = [ppm]  
 Dimensions = X  
 Site = ECA600  
 Spectrometer = DELTA2\_NMR  
 Field\_Strength = 14.09636928[T] (600[MHz])  
 X\_Acq\_Duration = 0.69206016[s]  
 X\_Domain = 13C  
 X\_Freq = 150.91343039[MHz]  
 X\_Offset = 100[ppm]  
 X\_Points = 32768  
 X\_Prescans = 4  
 X\_Resolution = 1.44496109[Hz]  
 X\_Sweep = 47.34848485[KHz]  
 X\_Sweep\_Clippped = 37.87878788[KHz]  
 Irr\_Domain = Proton  
 Irr\_Freq = 600.1723046[MHz]  
 Irr\_Offset = 5[ppm]  
 Clipped = FALSE  
 Mod\_Return = 1  
 Probe\_Recovery = 20[us]  
 Scans = 132  
 Total\_Scans = 132  
 X\_90\_Width = 8.4[us]  
 X\_Acq\_Time = 0.69206016[s]  
 X\_Angle = 30[deg]  
 X\_Atn = 6.4[db]  
 X\_Pulse = 2.8[us]  
 Irr\_Atn\_Dec = 18[db]  
 Irr\_Atn\_No = 18[db]  
 Irr\_Noise = WAL7Z  
 Irr\_Fwidth = 76[us]  
 Decoupling = TRUE  
 Initial\_Wait = 1[s]  
 Noe = TRUE  
 Noe\_Time = 2[s]  
 Recvr\_Gain = 56  
 Relaxation\_Delay = 2[s]  
 Repetition\_Time = 2.69206016[s]  
 Temp\_Get = 23.1[dc]

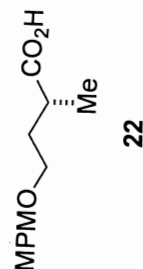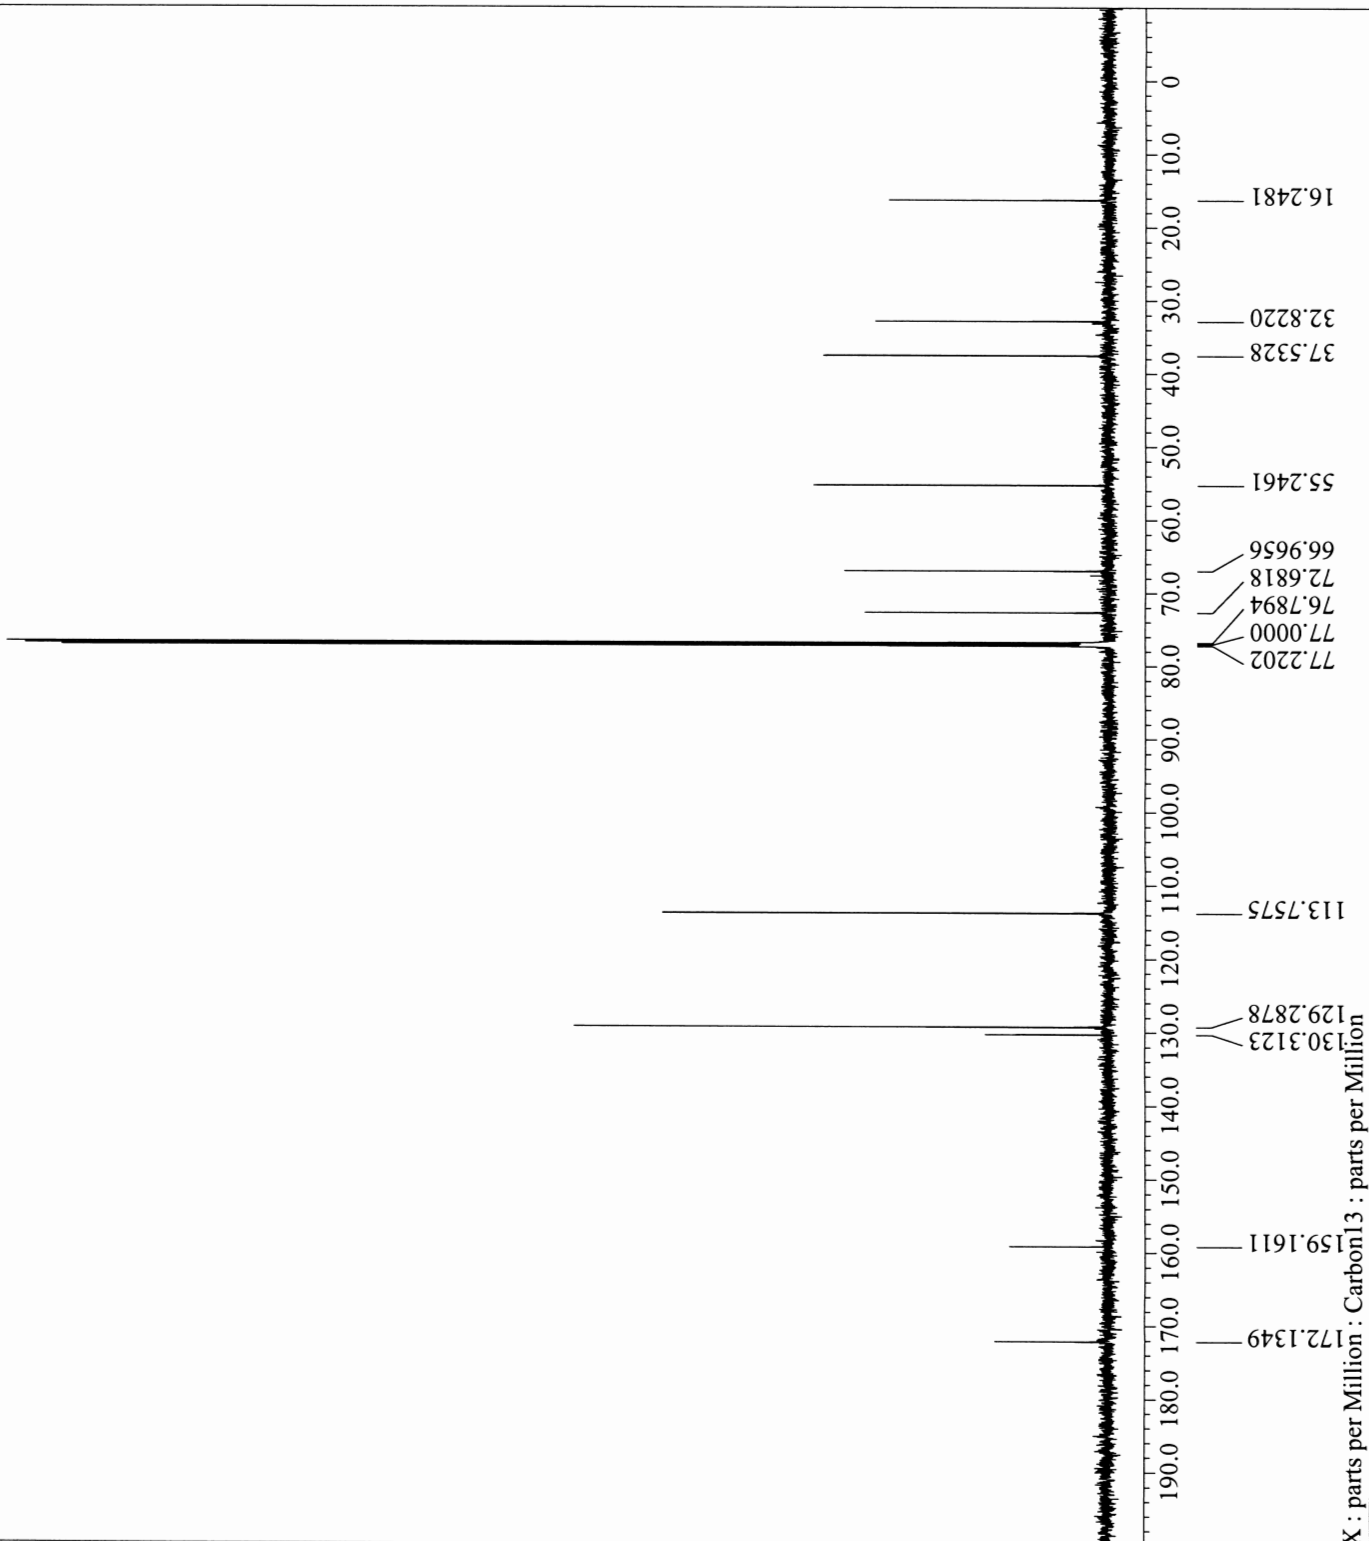

Filename = C:\Users\delta\Documents\J  
 Author = delta  
 Experiment = proton.jxp  
 Sample\_Id = HI-I-24  
 Solvent = CHLOROFORM-D  
 Creation\_Time = 5-OCT-2010 16:28:31  
 Revision\_Time = 5-OCT-2010 20:09:28  
 Current\_Time = 5-OCT-2010 20:09:51  
 Comment = single\_pulse  
 Data\_Format = 1D COMPLEX  
 Dim\_Size = 26214  
 Dim\_Title = Proton  
 Dim\_Units = [ppm]  
 Dimensions = X  
 Site = ECA600  
 Spectrometer = DELTA2\_NMR  
 Field\_Strength = 14.09636928[T] (600 [MHz])  
 X\_Acq\_Duration = 2.9097984[s]  
 X\_Domain = 1H  
 X\_Freq = 600.1723046 [MHz]  
 X\_Offset = 5 [ppm]  
 X\_Points = 32768  
 X\_Prescans = 1  
 X\_Resolution = 0.34366642 [Hz]  
 X\_Sweep = 11.26126126 [kHz]  
 X\_Sweep\_Clippped = 9.00900901 [kHz]  
 Irr\_Domain = Proton  
 Irr\_Freq = 600.1723046 [MHz]  
 Irr\_Offset = 5 [ppm]  
 Tri\_Domain = Proton  
 Tri\_Freq = 600.1723046 [MHz]  
 Tri\_Offset = 5 [ppm]  
 Clipped = FALSE  
 Mod\_Return = 1  
 Probe\_Recovery = 5 [us]  
 Scans = 8  
 Total\_Scans = 8  
 X\_90\_Width = 12.4 [us]  
 X\_Acq\_Time = 2.9097984 [s]  
 X\_Angle = 45 [deg]  
 X\_Atn = 3 [dB]  
 X\_Pulse = 6.2 [us]  
 Irr\_Mode = Off  
 Tri\_Mode = Off  
 Dante\_Presat = FALSE  
 Initial\_Wait = 1 [s]  
 Recvr\_Gain = 36  
 Relaxation\_Delay = 1 [s]  
 Repetition\_Time = 3.9097984 [s]  
 Temp\_Get = 22.1 [dC]

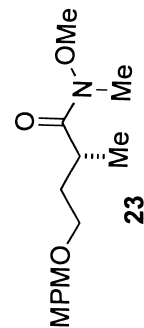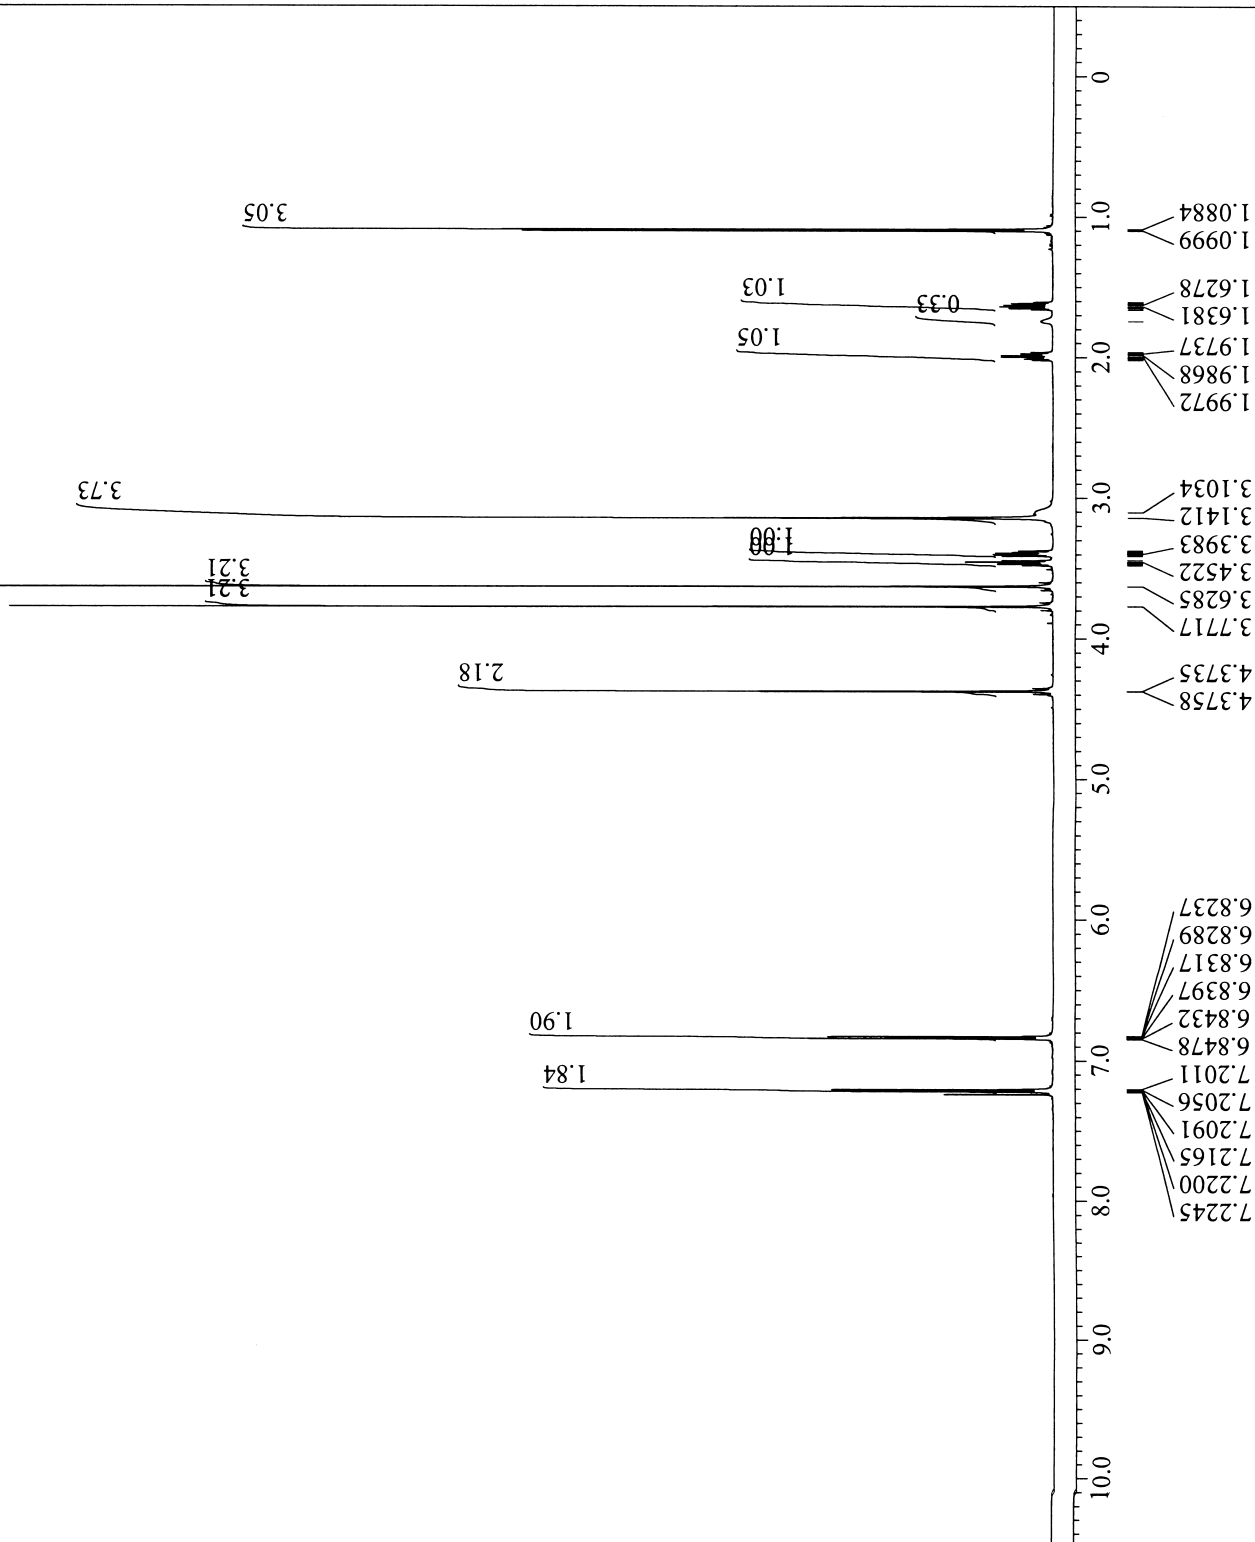

X : parts per Million : Proton : parts per Million

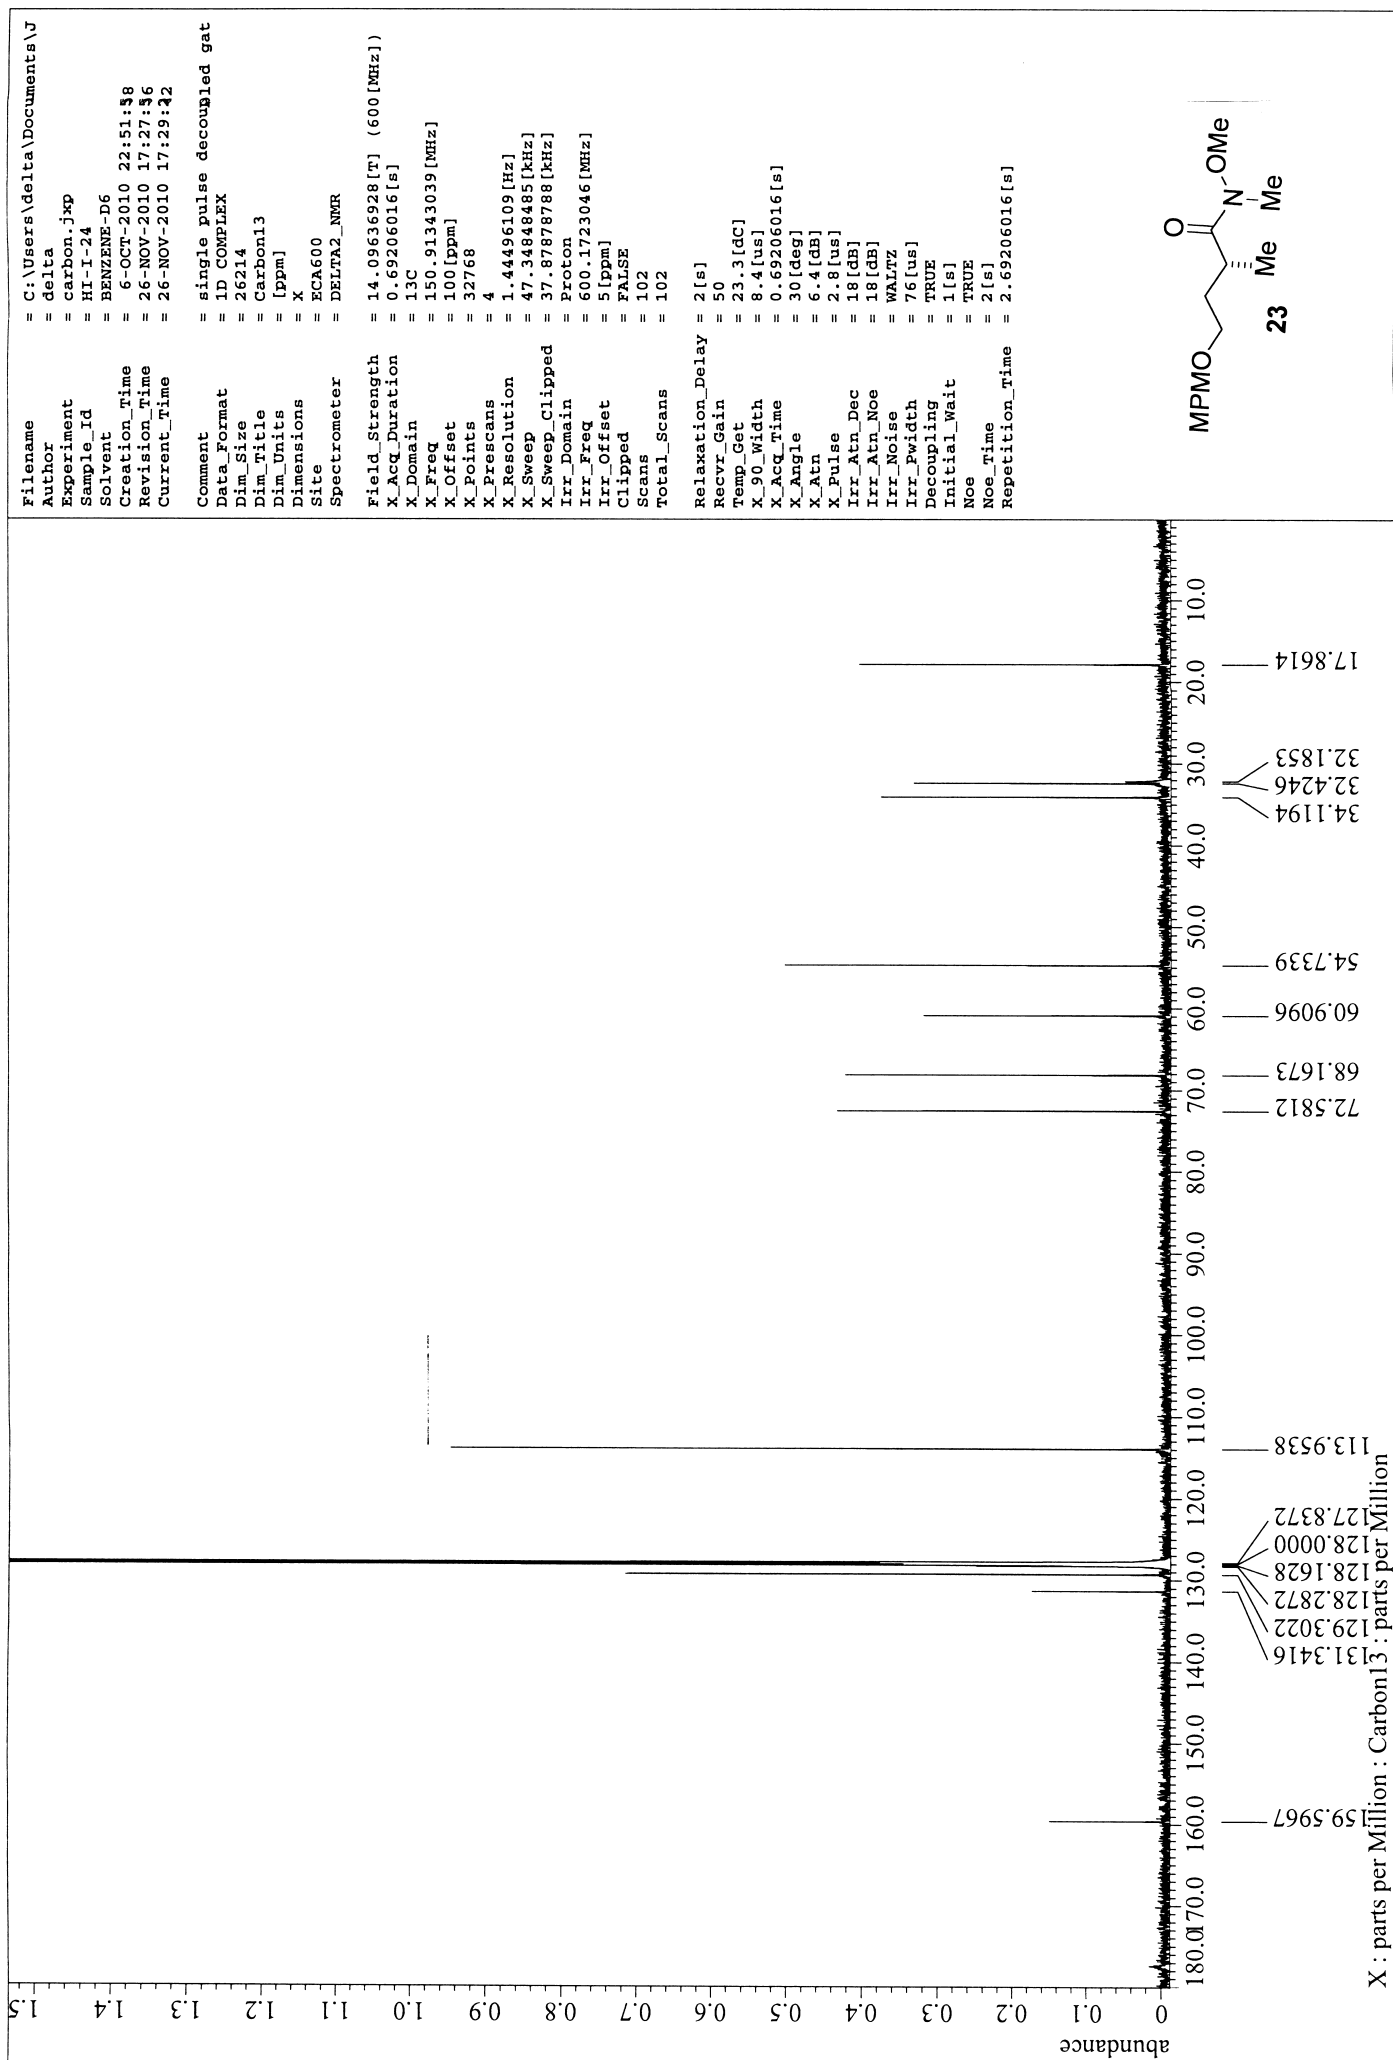

Filename = C:\Users\delta\Documents\J  
 Author = delta  
 Experiment = Proton.jxp  
 Sample\_Id = MN-III-70 & 82  
 Solvent = CHLOROFORM-D  
 Creation\_Time = 8-OCT-2010 15:51:17  
 Revision\_Time = 8-OCT-2010 16:00:54  
 Current\_Time = 8-OCT-2010 16:01:15  
 Comment = single\_pulse  
 Data\_Format = 1D COMPLEX  
 Dim\_Size = 26214  
 Dim\_Title = Proton  
 Dim\_Units = [ppm]  
 Dimensions = X  
 Site = ECA600  
 Spectrometer = DELTA2\_NMR  
 Field\_Strength = 14.09636928[T] (600 [MHz])  
 X\_Acq\_Duration = 2.9097984[s]  
 X\_Domain = 1H  
 X\_Freq = 600.1723046 [MHz]  
 X\_Offset = 5 [ppm]  
 X\_Points = 32768  
 X\_Prescans = 1  
 X\_Resolution = 0.34366642 [Hz]  
 X\_Sweep = 11.26126126 [kHz]  
 X\_Sweep\_Clippped = 9.00900901 [kHz]  
 Irr\_Domain = Proton  
 Irr\_Freq = 600.1723046 [MHz]  
 Irr\_Offset = 5 [ppm]  
 Tri\_Domain = Proton  
 Tri\_Freq = 600.1723046 [MHz]  
 Tri\_Offset = 5 [ppm]  
 Clipped = FALSE  
 Mod\_Return = 1  
 Probe\_Recovery = 5 [us]  
 Scans = 8  
 Total\_Scans = 8  
 X\_90\_Width = 12.4 [us]  
 X\_Acq\_Time = 2.9097984 [s]  
 X\_Angle = 45 [deg]  
 X\_Atn = 3 [dB]  
 X\_Pulse = 6.2 [us]  
 Irr\_Mode = Off  
 Tri\_Mode = Off  
 Dante\_Presat = FALSE  
 Initial\_Wait = 1 [s]  
 Recvr\_Gain = 42  
 Relaxation\_Delay = 1 [s]  
 Repetition\_Time = 3.9097984 [s]  
 Temp\_Get = 22.3 [dC]

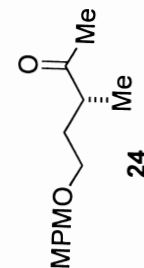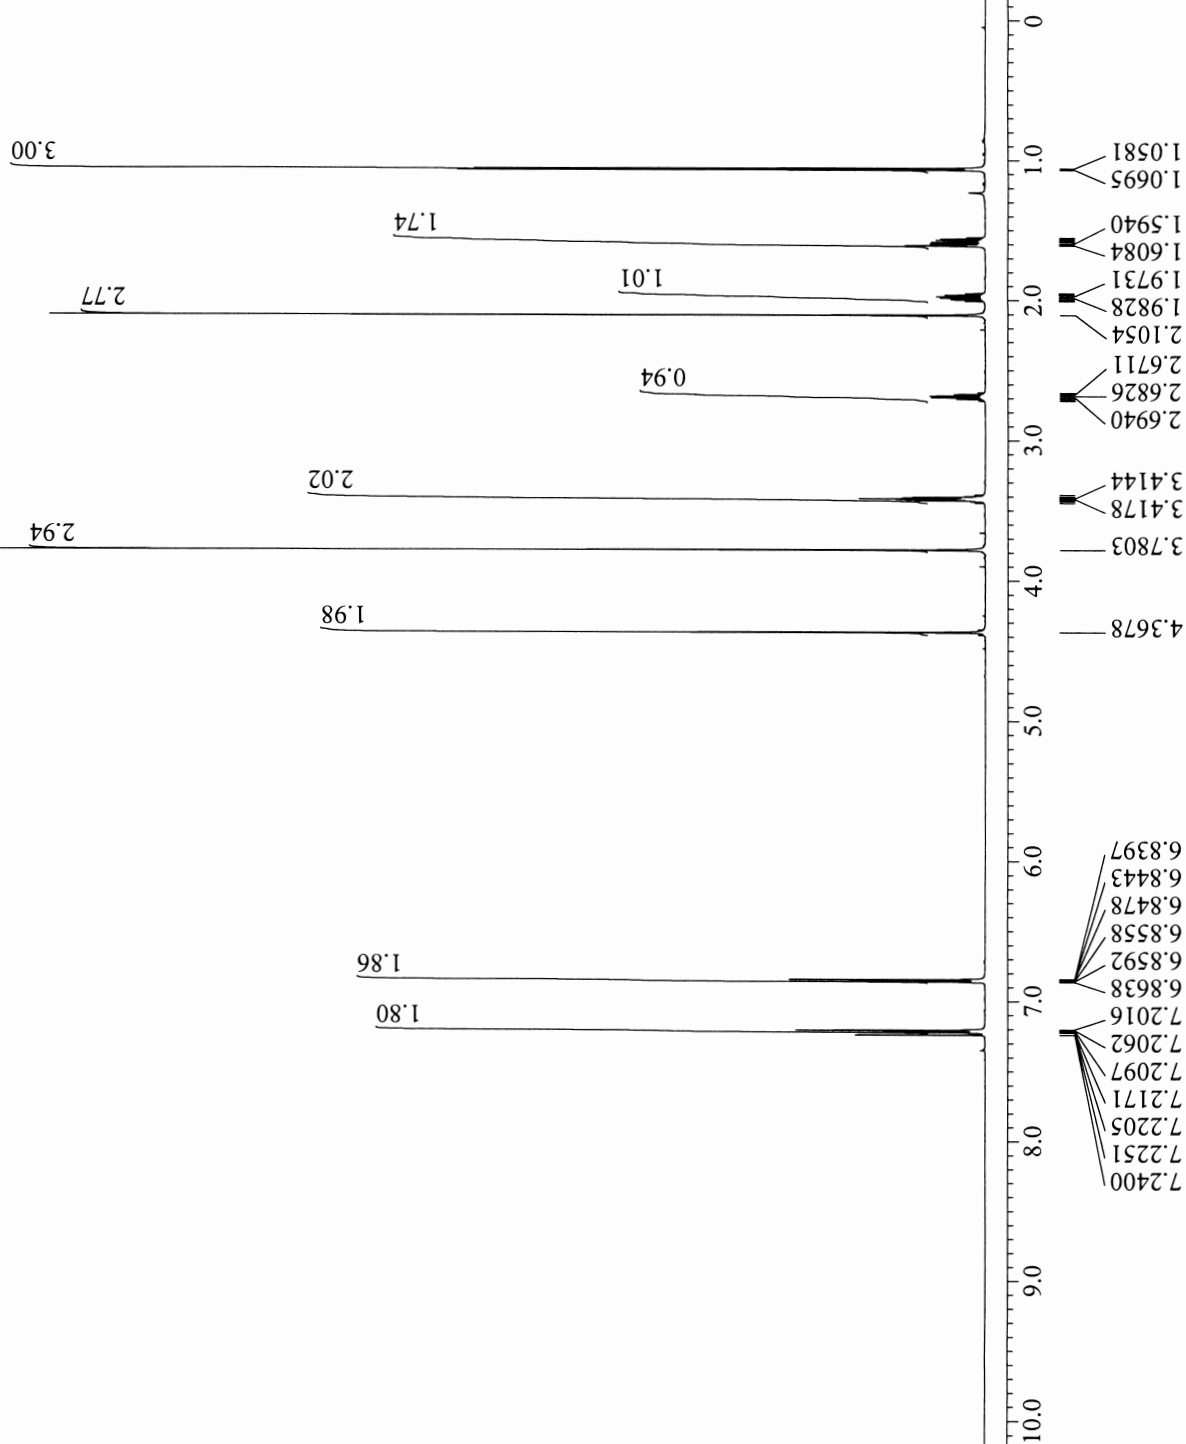

X : parts per Million : Proton : parts per Million



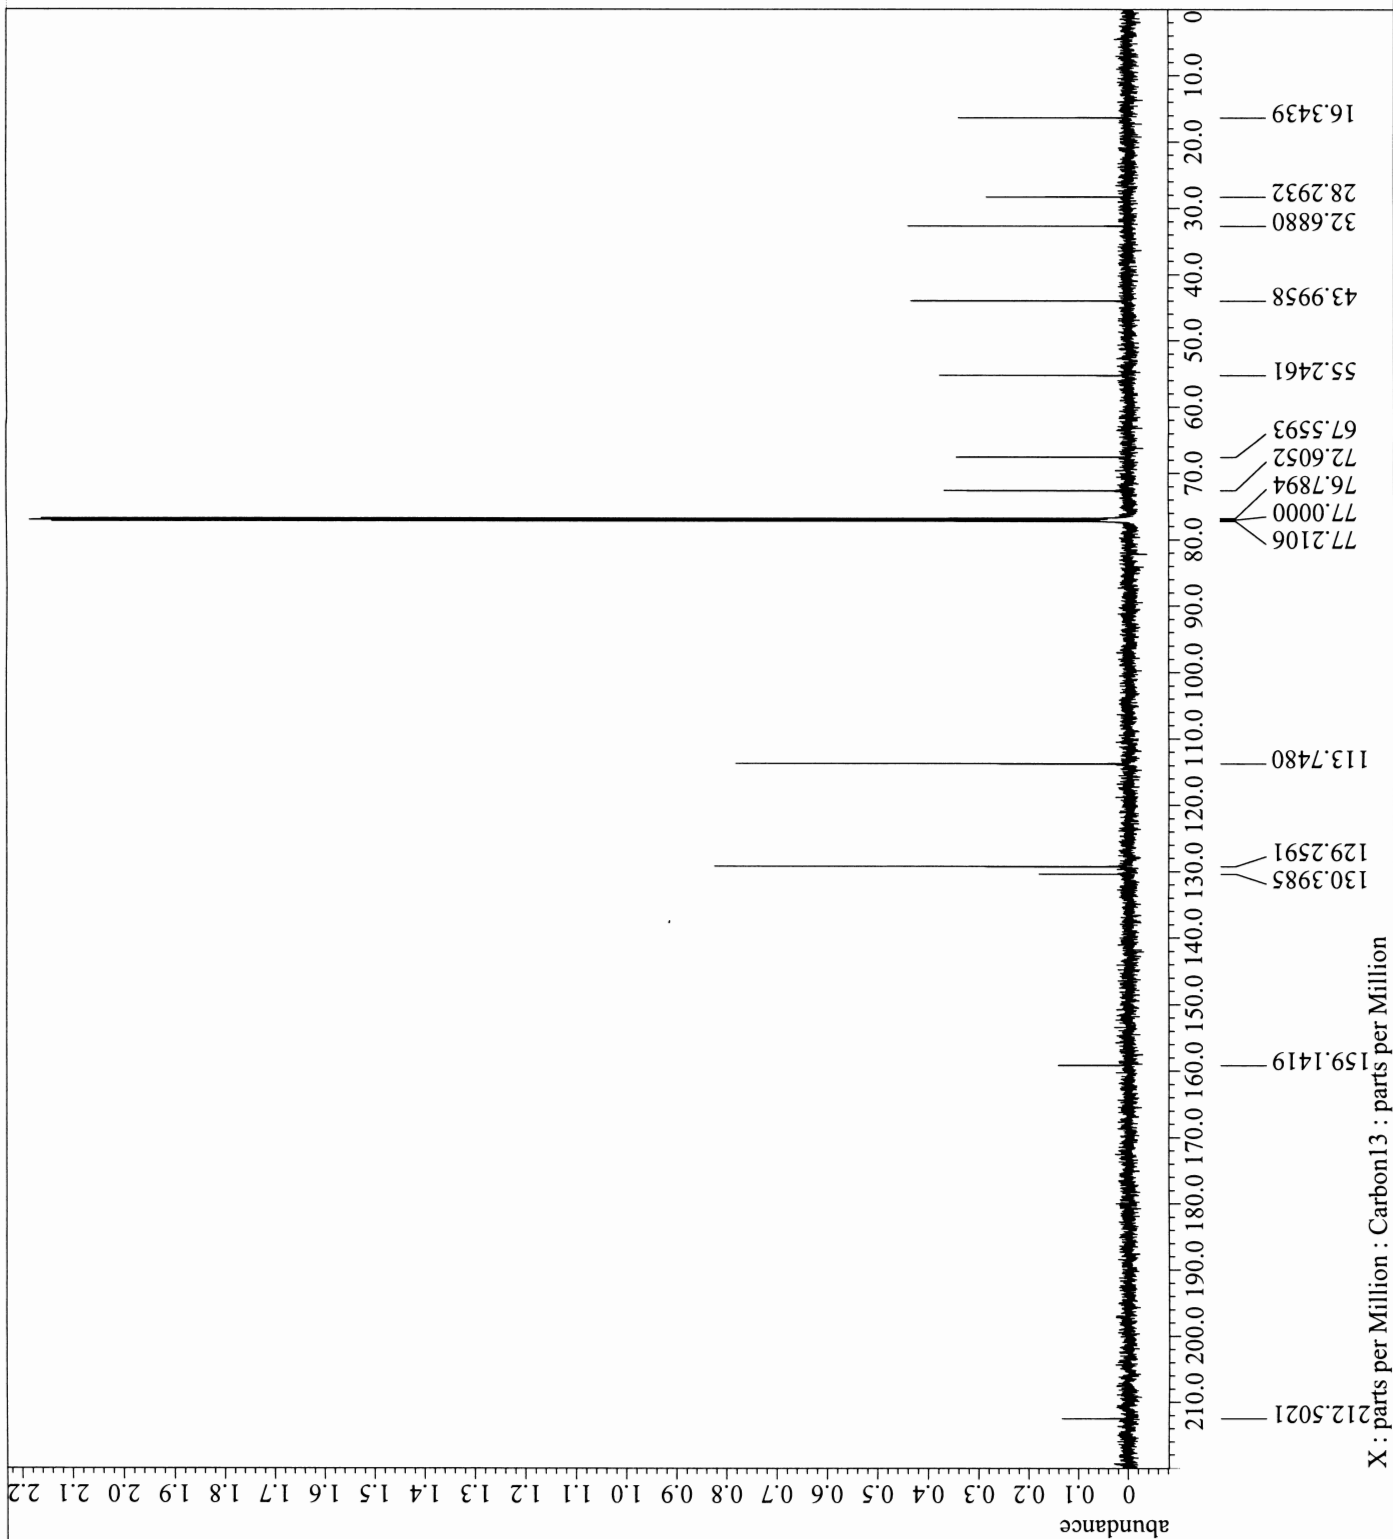

```

Filename = C:\Users\delta\Documents\J
Author = delta
Experiment = carbon.jpg
Sample_Id = MN-III-70 & 82
Solvent = CHLOROFORM-D
Creation_Time = 8-OCT-2010 17:31:05
Revision_Time = 8-OCT-2010 17:37:19
Current_Time = 8-OCT-2010 17:37:59

Comment = single pulse decoupled gat
Data_Format = 1D COMPLEX
Dim_Size = 26214
Dim_Title = Carbon13
Dim_Units = [ppm]
Dimensions = X
Site = ECA600
Spectrometer = DELTA2_NMR

Field_Strength = 14.09636928[T] (600[MHz])
X_Acq_Duration = 0.69206016[s]
X_Domain = 13C
X_Freq = 150.91343039[MHz]
X_Offset = 100[ppm]
X_Points = 32768
X_Prescans = 4
X_Resolution = 1.44496109[Hz]
X_Sweep = 47.34848485[kHz]
X_Sweep_Clipped = 37.87878788[kHz]
Irr_Domain = Proton
Irr_Freq = 600.1723046[MHz]
Irr_Offset = 5[ppm]
Clipped = FALSE
Mod_Return = 1
Probe_Recovery = 20[us]
Scans = 103
Total_Scans = 103

X_90_Width = 8.4[us]
X_Acq_Time = 0.69206016[s]
X_Angle = 30[deg]
X_Atn = 6.4[dB]
X_Pulse = 2.8[us]
Irr_Atn_Dec = 18[dB]
Irr_Atn_Noise = 18[dB]
Irr_Noise = WALTZ
Irr_Fwidth = 76[us]
Decoupling = TRUE
Initial_Wait = 1[s]
Noe = TRUE
Noe_Time = 2[s]
Recvr_Gain = 56
Relaxation_Delay = 2[s]
Repetition_Time = 2.69206016[s]
Temp_Get = 22.9[dc]

```

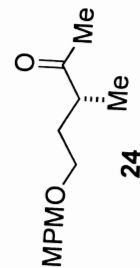

Filename = C:\Users\delta\Documents\J  
 Author = delta  
 Experiment = proton.jxp  
 Sample\_Id = MN-III-94 & 95  
 Solvent = BENZENE-D6  
 Creation\_Time = 8-OCT-2010 15:57:28  
 Revision\_Time = 8-OCT-2010 17:23:11  
 Current\_Time = 8-OCT-2010 17:23:43  
 Comment = single\_pulse  
 Data\_Format = 1D\_COMPLEX  
 Dim\_Size = 26214  
 Dim\_Title = Proton  
 Dim\_Units = [ppm]  
 Dimensions = X  
 Site = ECA600  
 Spectrometer = DELTA2\_NMR  
 Field\_Strength = 14.09636928[T] (600[MHz])  
 X\_Acq\_Duration = 2.9097984[s]  
 X\_Domain = 1H  
 X\_Freq = 600.1723046[MHz]  
 X\_Offset = 5[ppm]  
 X\_Points = 32768  
 X\_Prescans = 1  
 X\_Resolution = 0.34366642[Hz]  
 X\_Sweep = 11.26126126[kHz]  
 X\_Sweep\_Clippped = 9.00900901[kHz]  
 Irr\_Domain = Proton  
 Irr\_Freq = 600.1723046[MHz]  
 Irr\_Offset = 5[ppm]  
 Tri\_Domain = Proton  
 Tri\_Freq = 600.1723046[MHz]  
 Tri\_Offset = 5[ppm]  
 Clipped = FALSE  
 Mod\_Return = 1  
 Probe\_Recovery = 5[us]  
 Scans = 8  
 Total\_Scans = 8  
 X\_90\_Width = 12.4[us]  
 X\_Acq\_Time = 2.9097984[s]  
 X\_Angle = 45[deg]  
 X\_Atn = 3[db]  
 X\_Pulse = 6.2[us]  
 Irr\_Mode = Off  
 Tri\_Mode = Off  
 Dante\_Presat = FALSE  
 Initial\_Wait = 1[s]  
 Recvr\_Gain = 40  
 Relaxation\_Delay = 1[s]  
 Repetition\_Time = 3.9097984[s]  
 Temp\_Get = 22.2[dc]

8.10

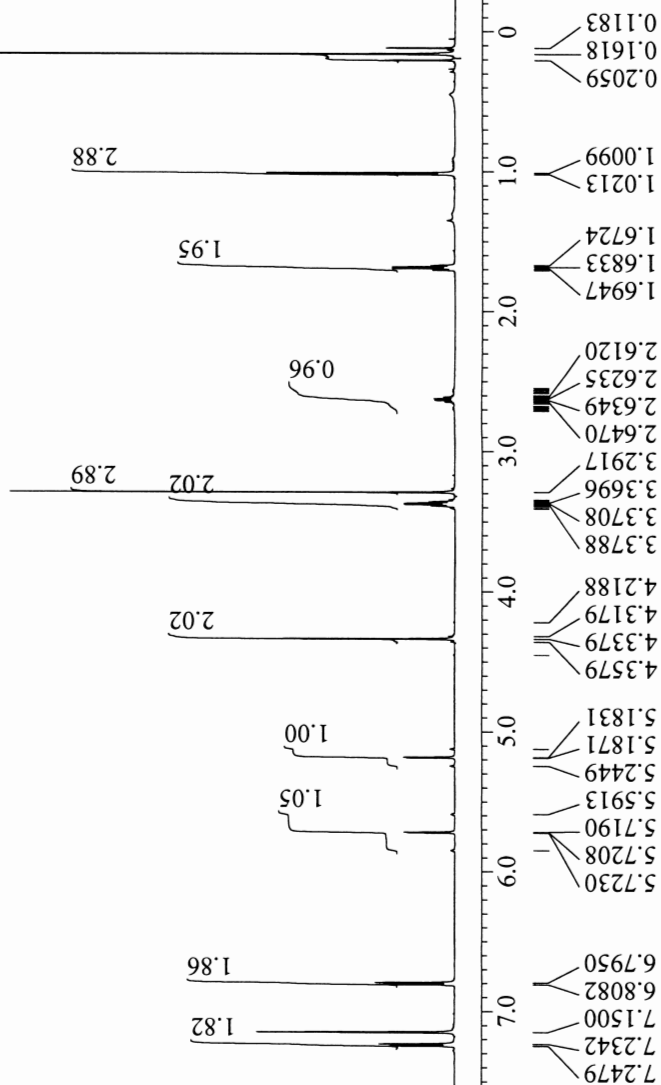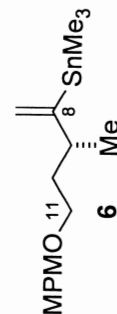

X : parts per Million : Proton : parts per Million

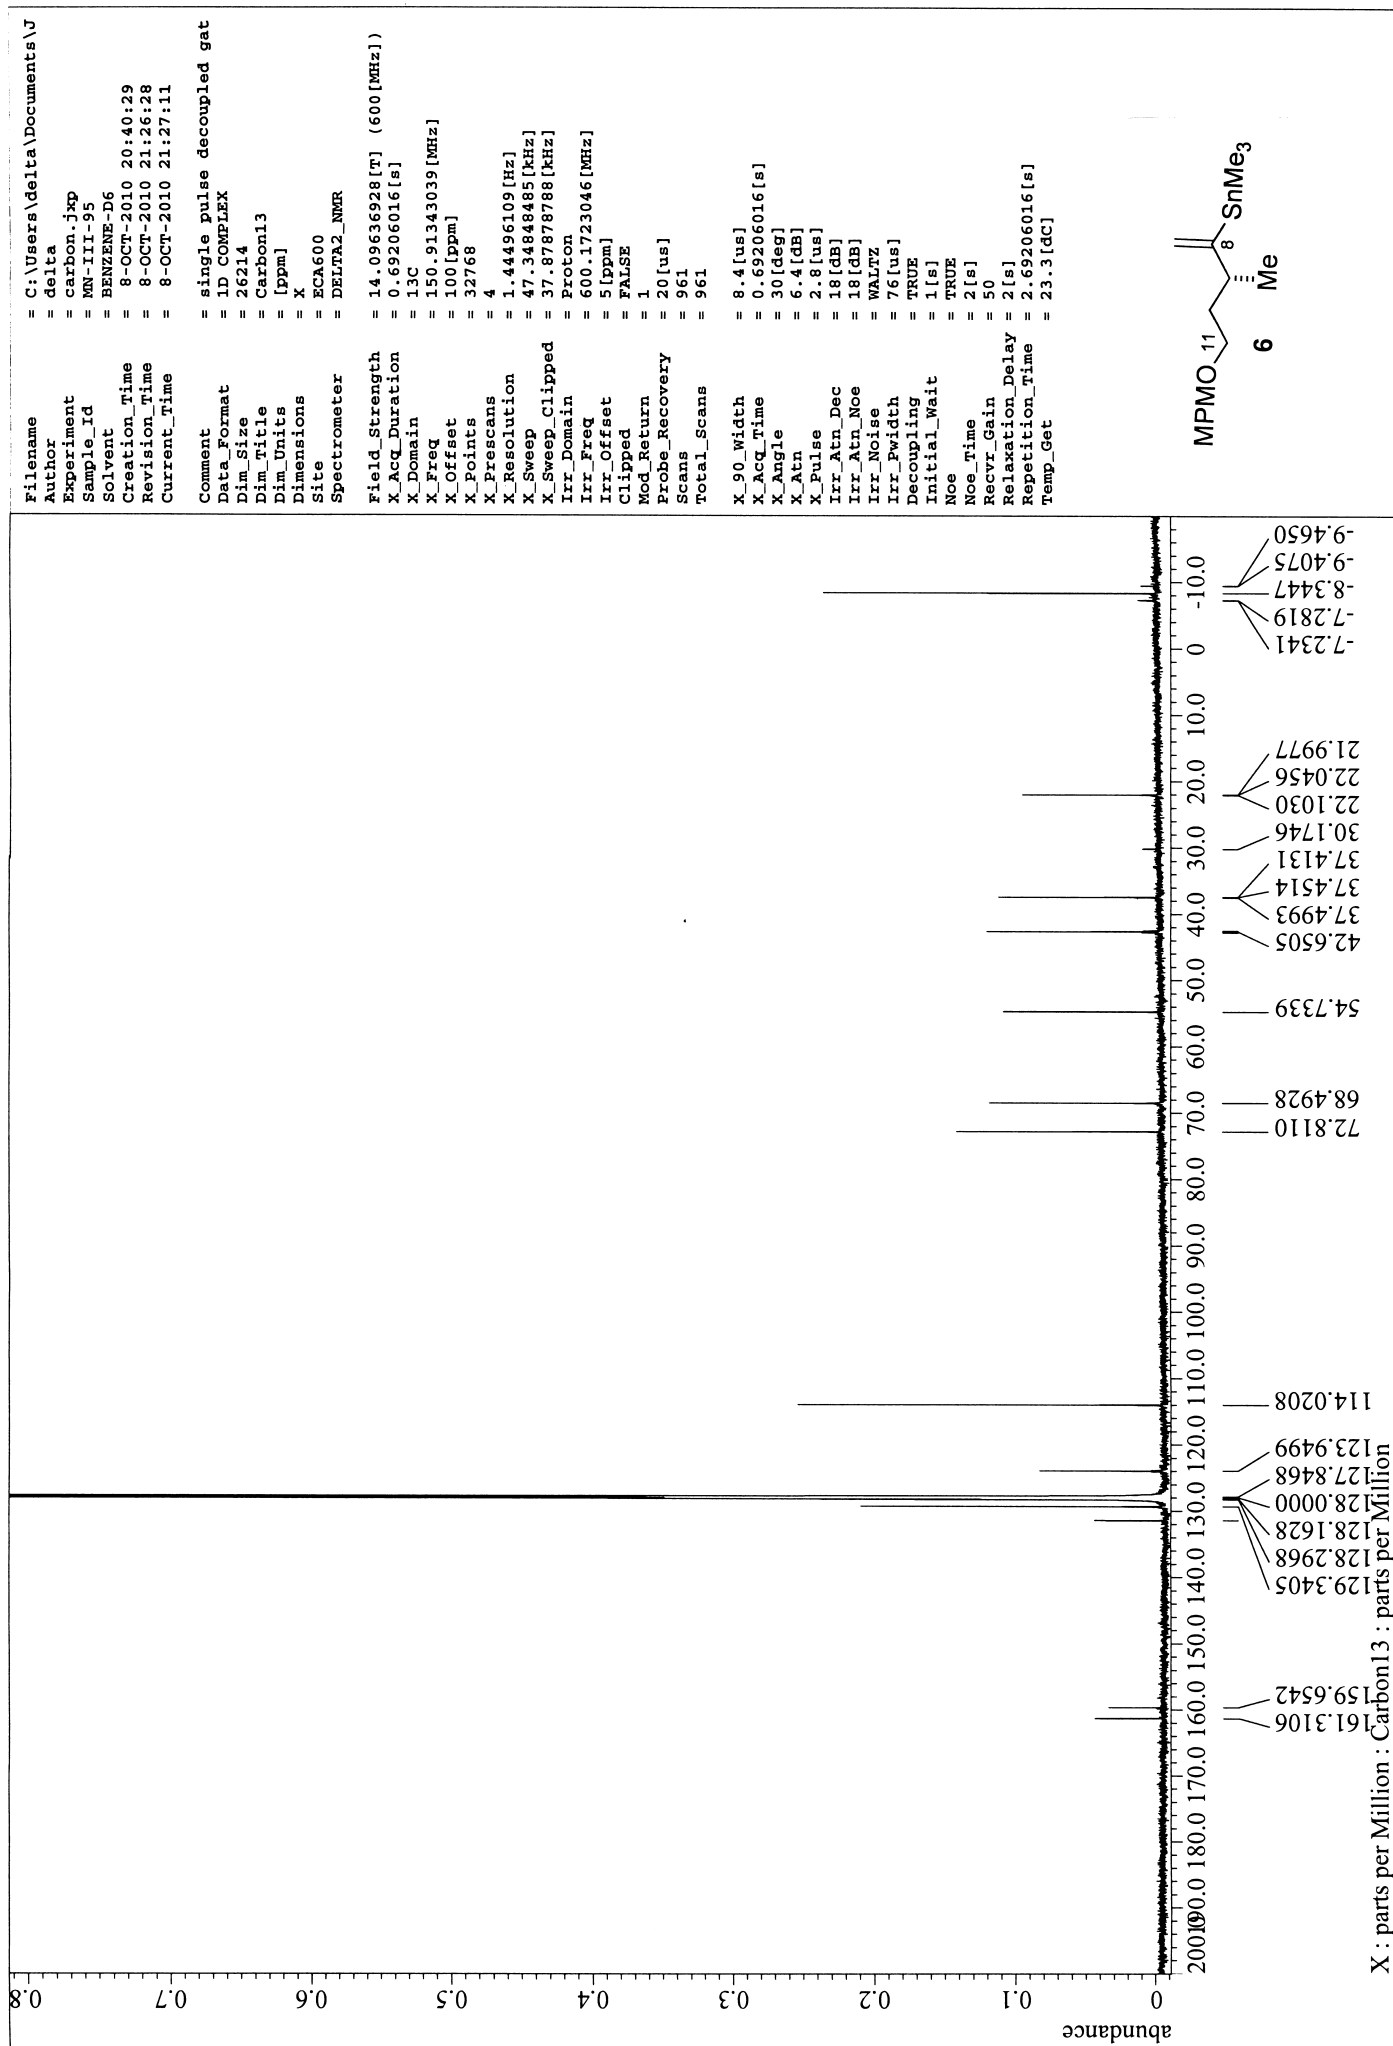

Filename = C:\Users\delta\Documents\J  
 Author = delta  
 Experiment = proton.jxp  
 Sample\_Id = MN-I-190  
 Solvent = CHLOROFORM-D  
 Creation\_Time = 13-OCT-2010 17:06:54  
 Revision\_Time = 13-OCT-2010 17:15:29  
 Current\_Time = 13-OCT-2010 17:15:48  
 Comment = single\_pulse  
 Data\_Format = 1D COMPLEX  
 Dim\_Size = 26214  
 Dim\_Title = Proton  
 Dim\_Units = [ppm]  
 Dimensions = x  
 Site = ECA600  
 Spectrometer = DELTA2\_NMR  
 Field\_Strength = 14.09636928[T] (600 [MHz])  
 X\_Acq\_Duration = 2.9097984[s]  
 X\_Domain = 1H  
 X\_Freq = 600.1723046 [MHz]  
 X\_Offset = 5 [ppm]  
 X\_Points = 32768  
 X\_Prescans = 1  
 X\_Resolution = 0.34366642 [Hz]  
 X\_Sweep = 11.26126126 [kHz]  
 X\_Sweep\_Clip = 9.00900901 [kHz]  
 Irr\_Domain = Proton  
 Irr\_Freq = 600.1723046 [MHz]  
 Irr\_Offset = 5 [ppm]  
 Tri\_Domain = Proton  
 Tri\_Freq = 600.1723046 [MHz]  
 Tri\_Offset = 5 [ppm]  
 Clipped = FALSE  
 Mod\_Return = 1  
 Probe\_Recovery = 5 [us]  
 Scans = 8  
 Total\_Scans = 8  
 X\_90\_Width = 12.4 [us]  
 X\_Acq\_Time = 2.9097984 [s]  
 X\_Angle = 45 [deg]  
 X\_Atn = 3 [dB]  
 X\_Pulse = 6.2 [us]  
 Irr\_Mode = Off  
 Tri\_Mode = Off  
 Dante\_Preset = FALSE  
 Initial\_Wait = 1 [s]  
 Recvr\_Gain = 28  
 Relaxation\_Delay = 1 [s]  
 Repetition\_Time = 3.9097984 [s]  
 Temp\_Get = 22.3 [dc]

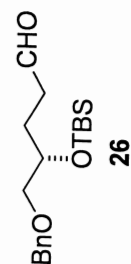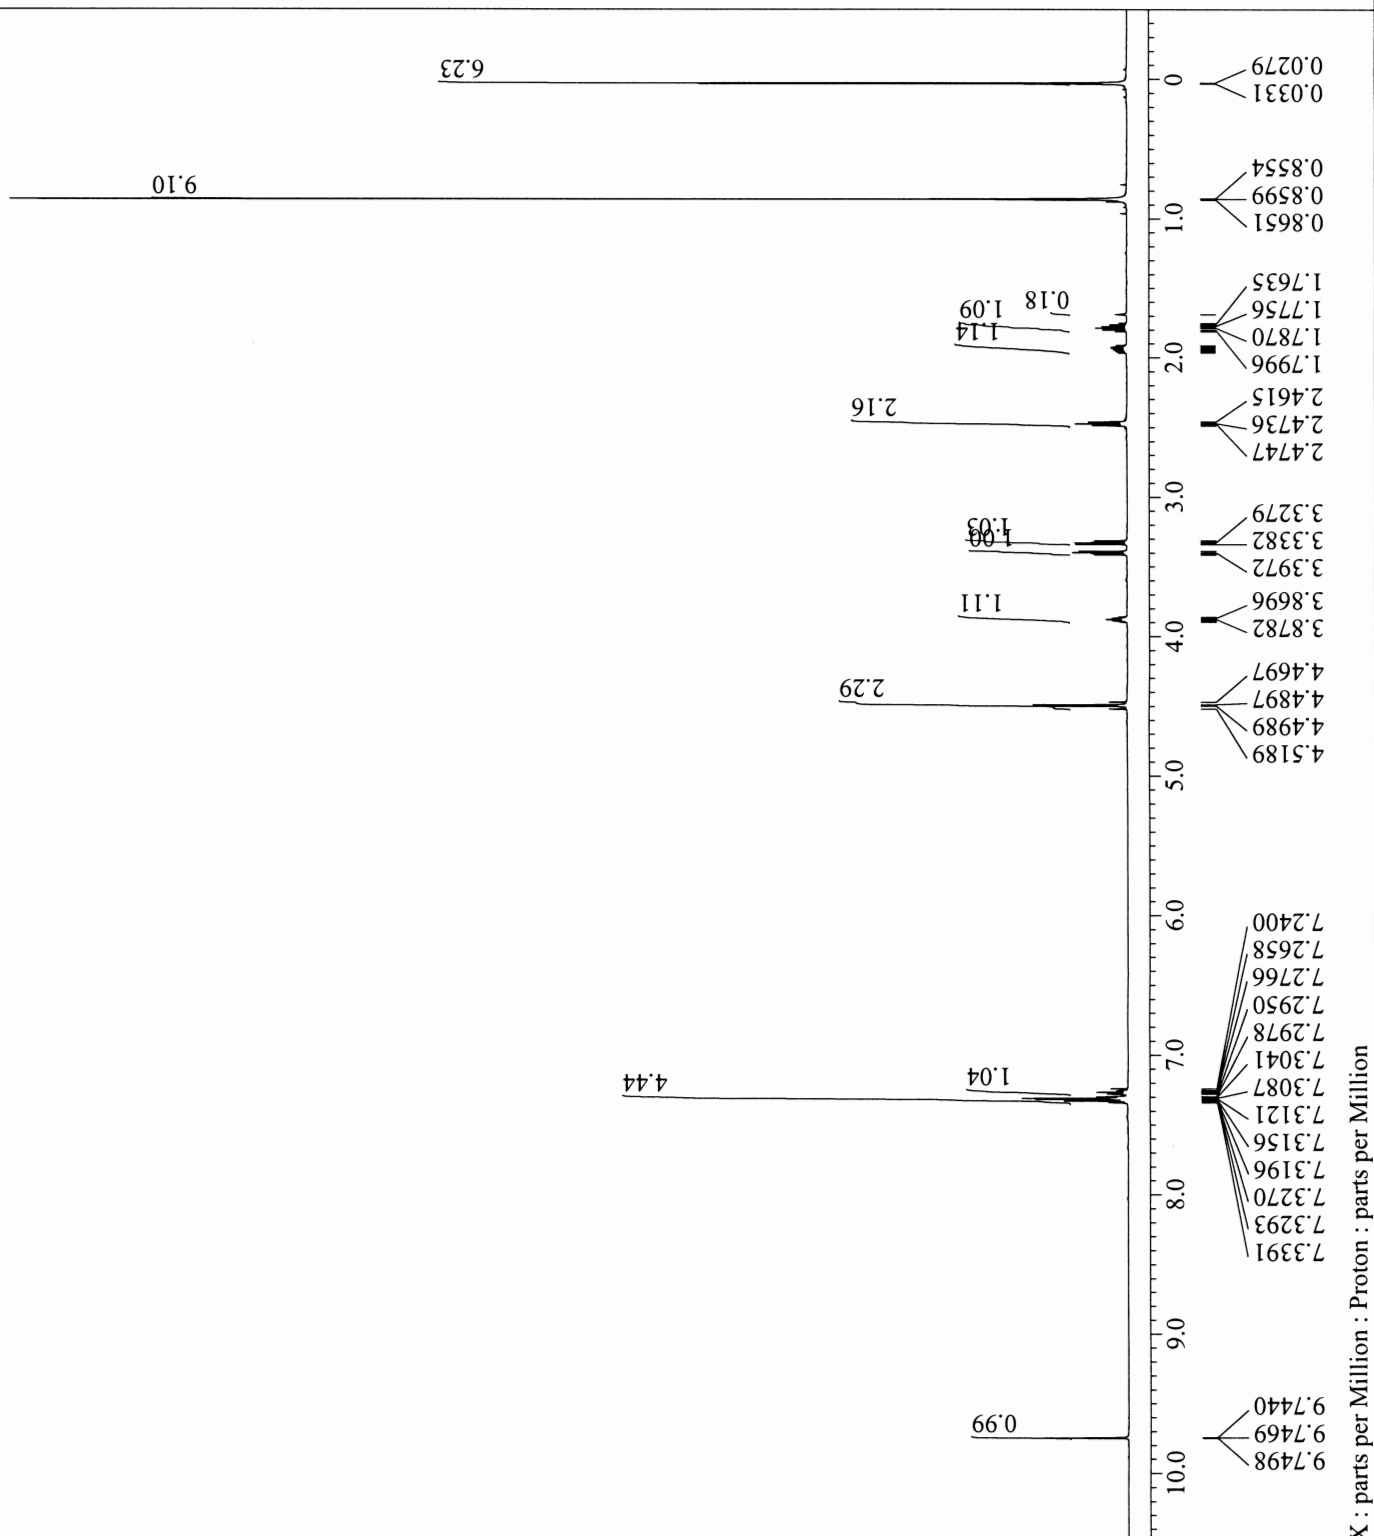

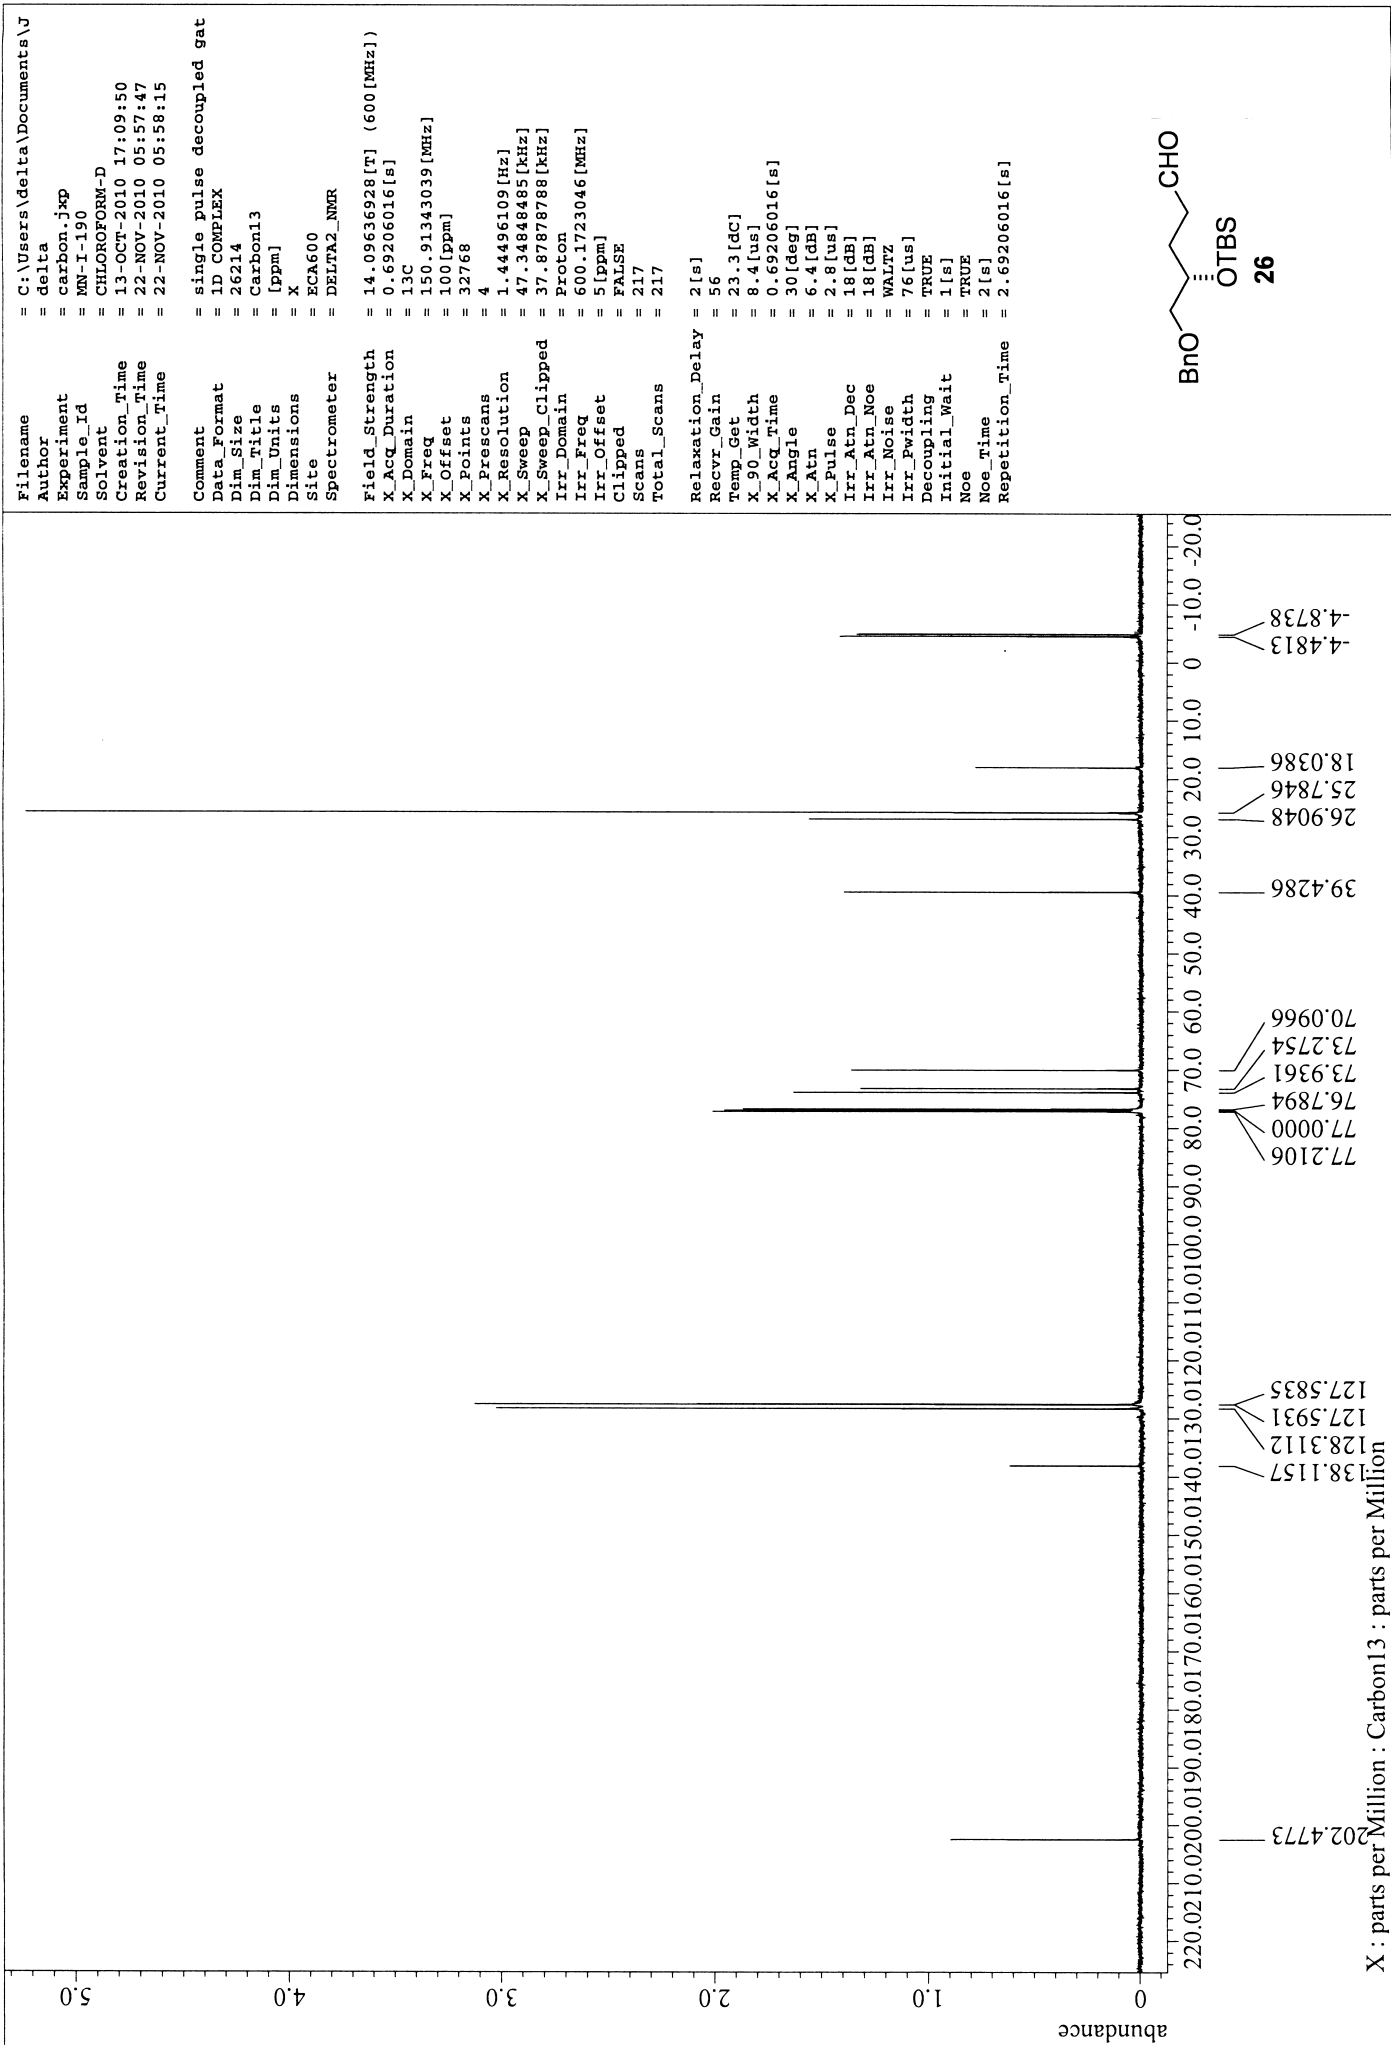

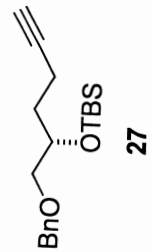

```

Filename = C:\Users\delta\Documents\J
Author = delta
Experiment = carbon.jpg
Sample_Id = MN-I-196
Solvent = CHLOROFORM-D
Creation_Time = 13-OCT-2010 17:50:34
Revision_Time = 13-OCT-2010 17:59:35
Current_Time = 13-OCT-2010 18:00:01

Comment = single pulse decoupled gat
Data_Format = 1D COMPLEX
Dim_Size = 26214
Dim_Title = Carbon13
Dim_Units = [ppm]
Dimensions = X
Site = ECA600
Spectrometer = DELTA2_NMR

Field_Strength = 14.09636928[T] (600[MHz])
X_Acq_Duration = 0.69206016[s]
X_Domain = 13C
X_Freq = 150.91343039[MHz]
X_Offset = 100[ppm]
X_Points = 32768
X_Prescans = 4
X_Resolution = 1.44496109[Hz]
X_Sweep = 47.34848485[kHz]
X_Sweep_Clippped = 37.87878788[kHz]
Irr_Domain = Proton
Irr_Freq = 600.1723046[MHz]
Irr_Offset = 5[ppm]
Clipped = FALSE
Mod_Return = 1
Probe_Recovery = 20[us]
Scans = 181
Total_Scans = 181

X_90_Width = 8.4[us]
X_Acq_Time = 0.69206016[s]
X_Angle = 30[deg]
X_Atn = 6.4[dB]
X_Pulse = 2.8[us]
Irr_Atn_Dec = 18[dB]
Irr_Atn_Noe = 18[dB]
Irr_Noise = WALTZ
Irr_Width = 76[us]
Decoupling = TRUE
Initial_Wait = 1[s]
Noe = TRUE
Noe_Time = 2[s]
Recvr_Gain = 56
Relaxation_Delay = 2[s]
Repetition_Time = 2.69206016[s]
Temp_Get = 23[dc]

```

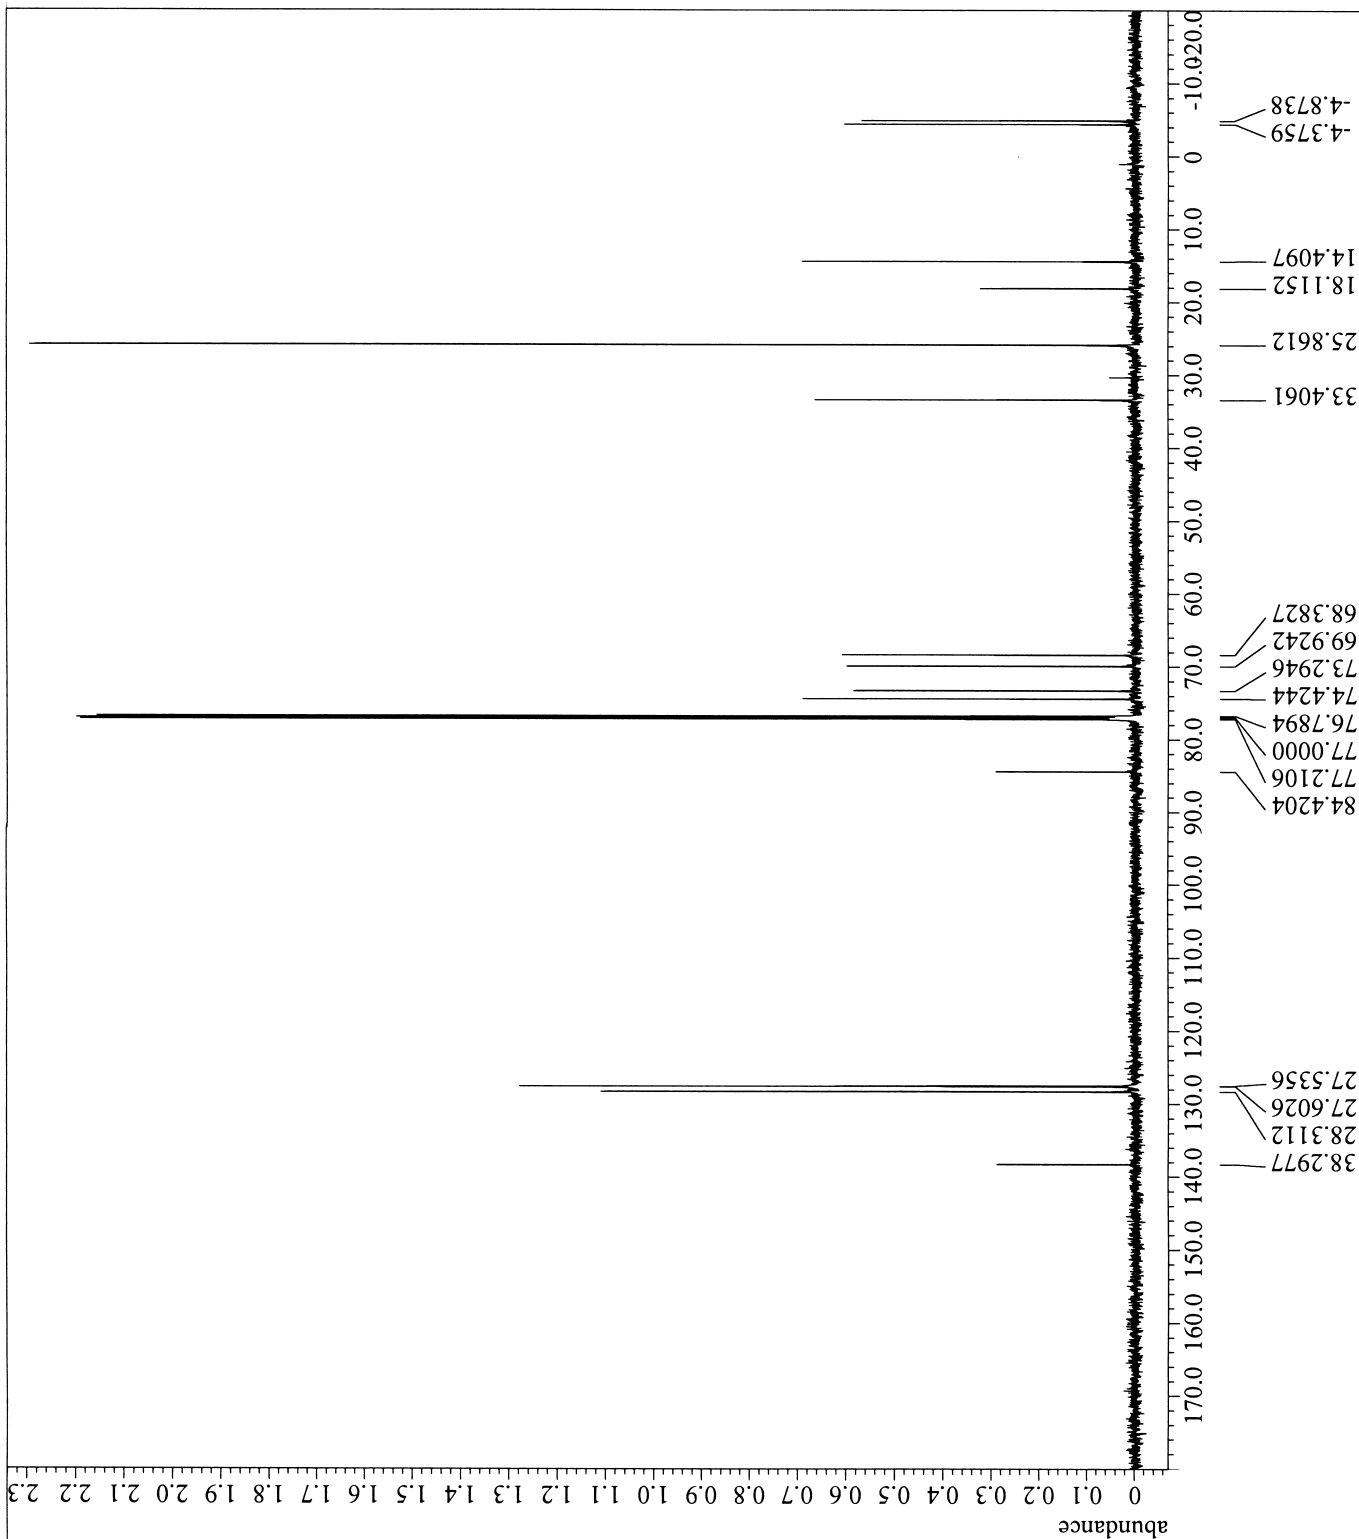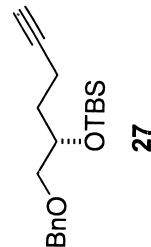

X : parts per Million : Carbon13 : parts per Million

Filename = C:\Users\delta\Documents\J  
 Author = delta  
 Experiment = Proton.jxp  
 Sample Id = MN-II-43  
 Solvent = BENZENE-D6  
 Creation\_Time = 13-OCT-2010 23:17:04  
 Revision\_Time = 13-OCT-2010 23:34:32  
 Current\_Time = 13-OCT-2010 23:34:52  
 Comment = single\_pulse  
 Data\_Format = 1D COMPLEX  
 Dim\_Size = 26214  
 Dim\_Title = Proton  
 Dim\_Units = [ppm]  
 Dimensions = X  
 Site = ECA600  
 Spectrometer = DELTA2\_NMR  
 Field\_Strength = 14.09636928[T] (600 [MHz])  
 X\_Acq\_Duration = 2.9097984[s]  
 X\_Domain = 1H  
 X\_Freq = 600.1723046 [MHz]  
 X\_Offset = 5 [ppm]  
 X\_Points = 32768  
 X\_Prescans = 1  
 X\_Resolution = 0.34366642 [Hz]  
 X\_Sweep = 11.26126126 [kHz]  
 X\_Sweep\_Clippped = 9.00900901 [kHz]  
 Irr\_Domain = Proton  
 Irr\_Freq = 600.1723046 [MHz]  
 Irr\_Offset = 5 [ppm]  
 Tri\_Domain = Proton  
 Tri\_Freq = 600.1723046 [MHz]  
 Tri\_Offset = 5 [ppm]  
 Clipped = FALSE  
 Mod\_Return = 1  
 Probe\_Recovery = 5 [us]  
 Scans = 8  
 Total\_Scans = 8  
 X\_90\_Width = 12.4 [us]  
 X\_Acq\_Time = 2.9097984 [s]  
 X\_Angle = 45 [deg]  
 X\_Atn = 3 [dB]  
 X\_Pulse = 6.2 [us]  
 Irr\_Mode = Off  
 Tri\_Mode = Off  
 Dante\_Presat = FALSE  
 Initial\_Wait = 1 [s]  
 Recvr\_Gain = 30  
 Relaxation\_Delay = 1 [s]  
 Repetition\_Time = 3.9097984 [s]  
 Temp\_Get = 22.3 [dc]

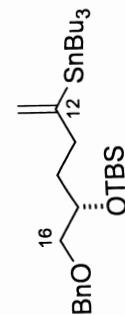

4

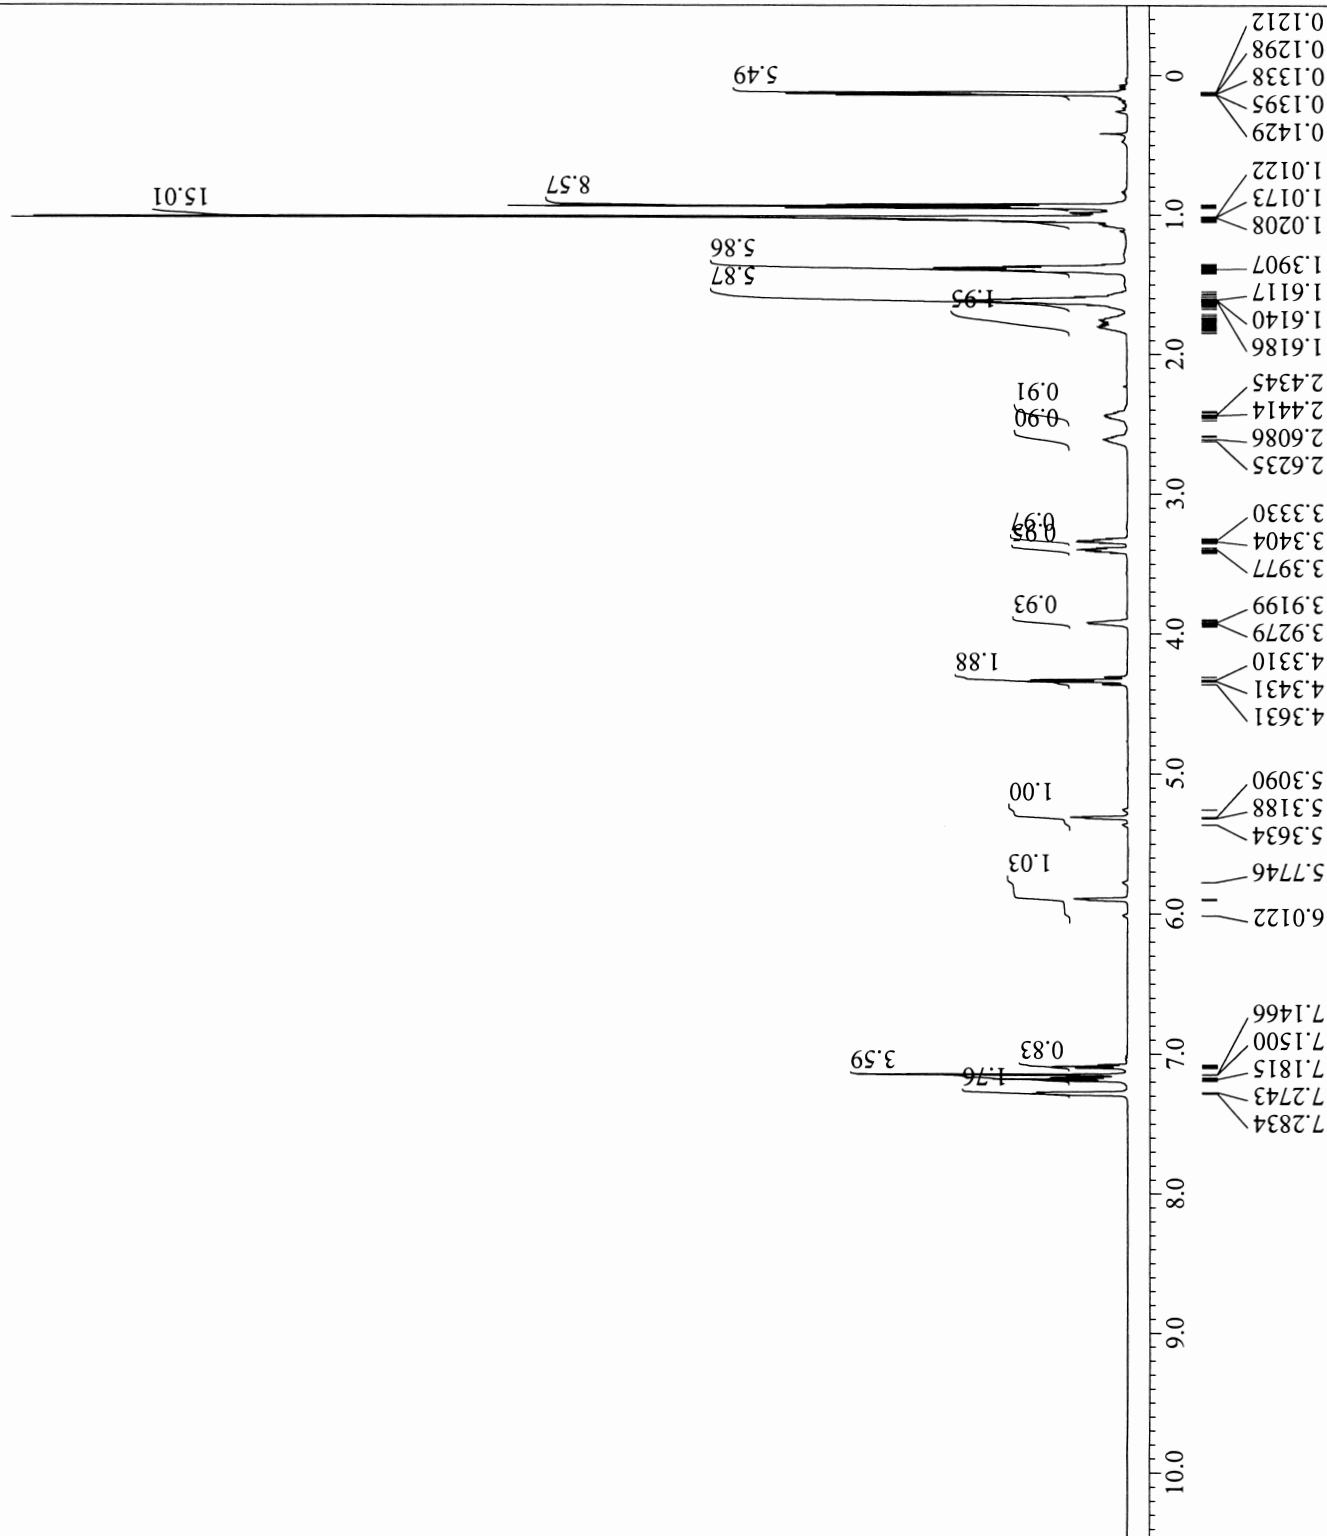

X : parts per Million : Proton : parts per Million



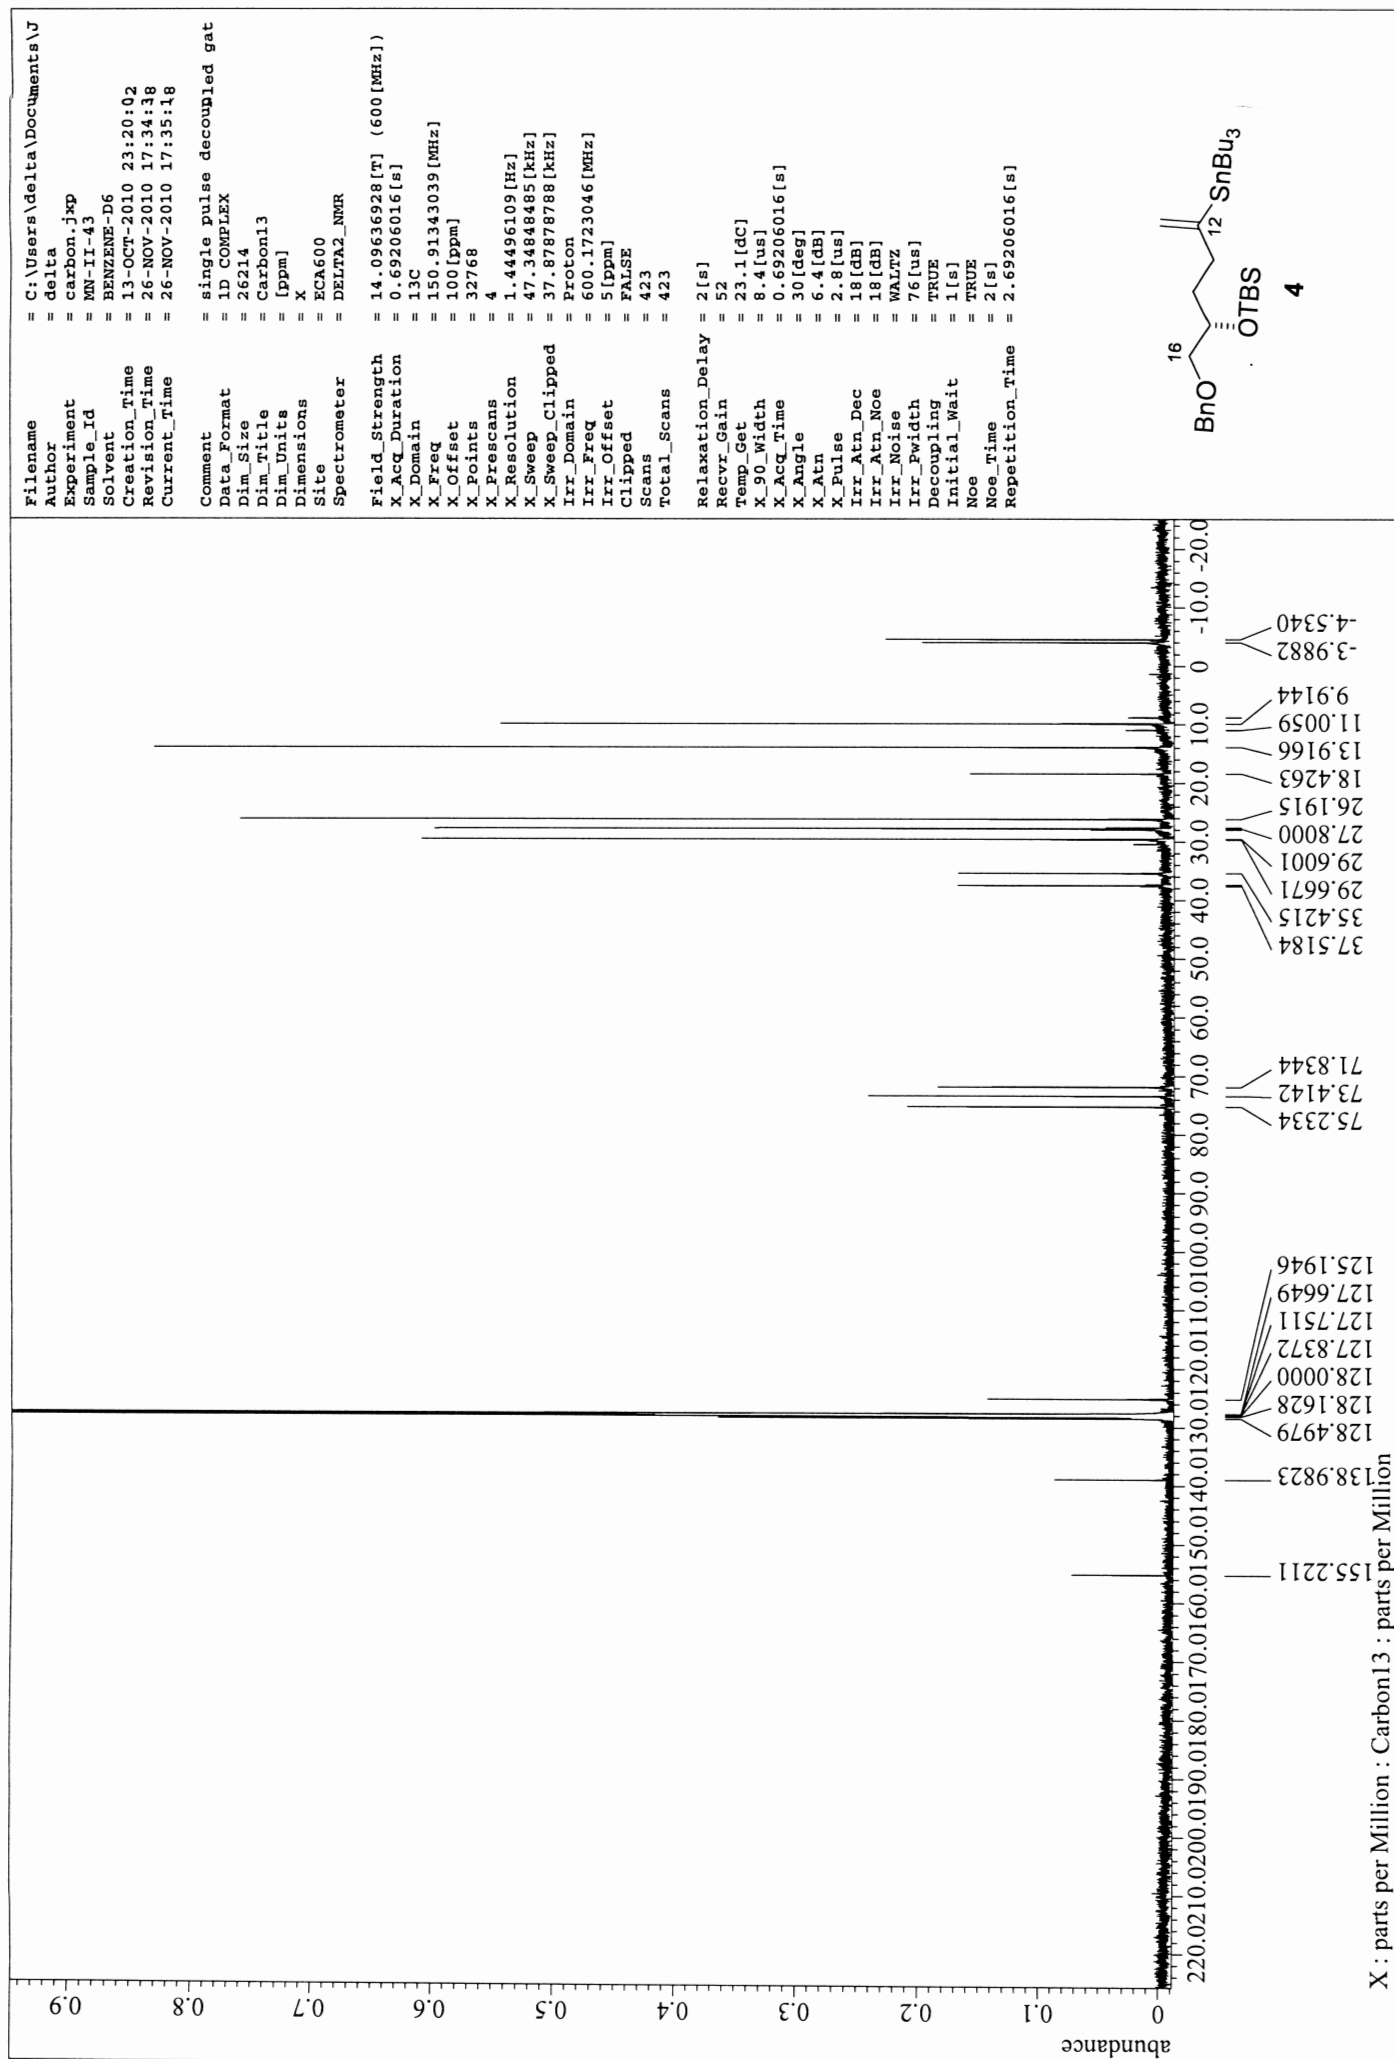

Filename = C:\Users\delta\Documents\J  
 = delta  
 Author = proton.jpg  
 Experiment = MN-III-107  
 Sample\_Id = CHLOROFORM-D  
 Solvent = 27-MAY-2010 21:11:29  
 Creation\_Time = 10-NOV-2010 18:55:42  
 Revision\_Time = 10-NOV-2010 18:56:09  
 Current\_Time  
 Comment = single\_pulse  
 Data\_Format = 1D COMPLEX  
 Dim\_Size = 26214  
 Dim\_Title = Proton  
 Dim\_Units = [ppm]  
 Dimensions = X  
 Site = ECA600  
 Spectrometer = DELTA2\_NMR  
 Field\_Strength = 14.09636928[T] (600[MHz])  
 X\_Acq\_Duration = 2.9097984[s]  
 X\_Domain = 1H  
 X\_Freq = 600.1723046[MHz]  
 X\_Offset = 5[ppm]  
 X\_Points = 32768  
 X\_Prescans = 1  
 X\_Resolution = 0.34366642[Hz]  
 X\_Sweep = 11.26126126[kHz]  
 X\_Sweep\_Clip = 9.00900901[kHz]  
 Irr\_Domain = Proton  
 Irr\_Freq = 600.1723046[MHz]  
 Irr\_Offset = 5[ppm]  
 Tri\_Domain = Proton  
 Tri\_Freq = 600.1723046[MHz]  
 Tri\_Offset = 5[ppm]  
 Clipped = FALSE  
 Scans = 8  
 Total\_Scans = 8  
 Relaxation\_Delay = 1[s]  
 Recvr\_Gain = 46  
 Temp\_Get = 21.8[dc]  
 X\_90\_Width = 12.4[us]  
 X\_Acq\_Time = 2.9097984[s]  
 X\_Angle = 45[deg]  
 X\_Atn = 3[db]  
 X\_Pulse = 6.2[us]  
 Irr\_Mode = Off  
 Tri\_Mode = Off  
 Dante\_Presat = FALSE  
 Initial\_Wait = 1[s]  
 Repetition\_Time = 3.9097984[s]

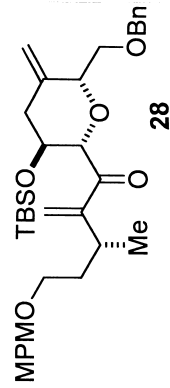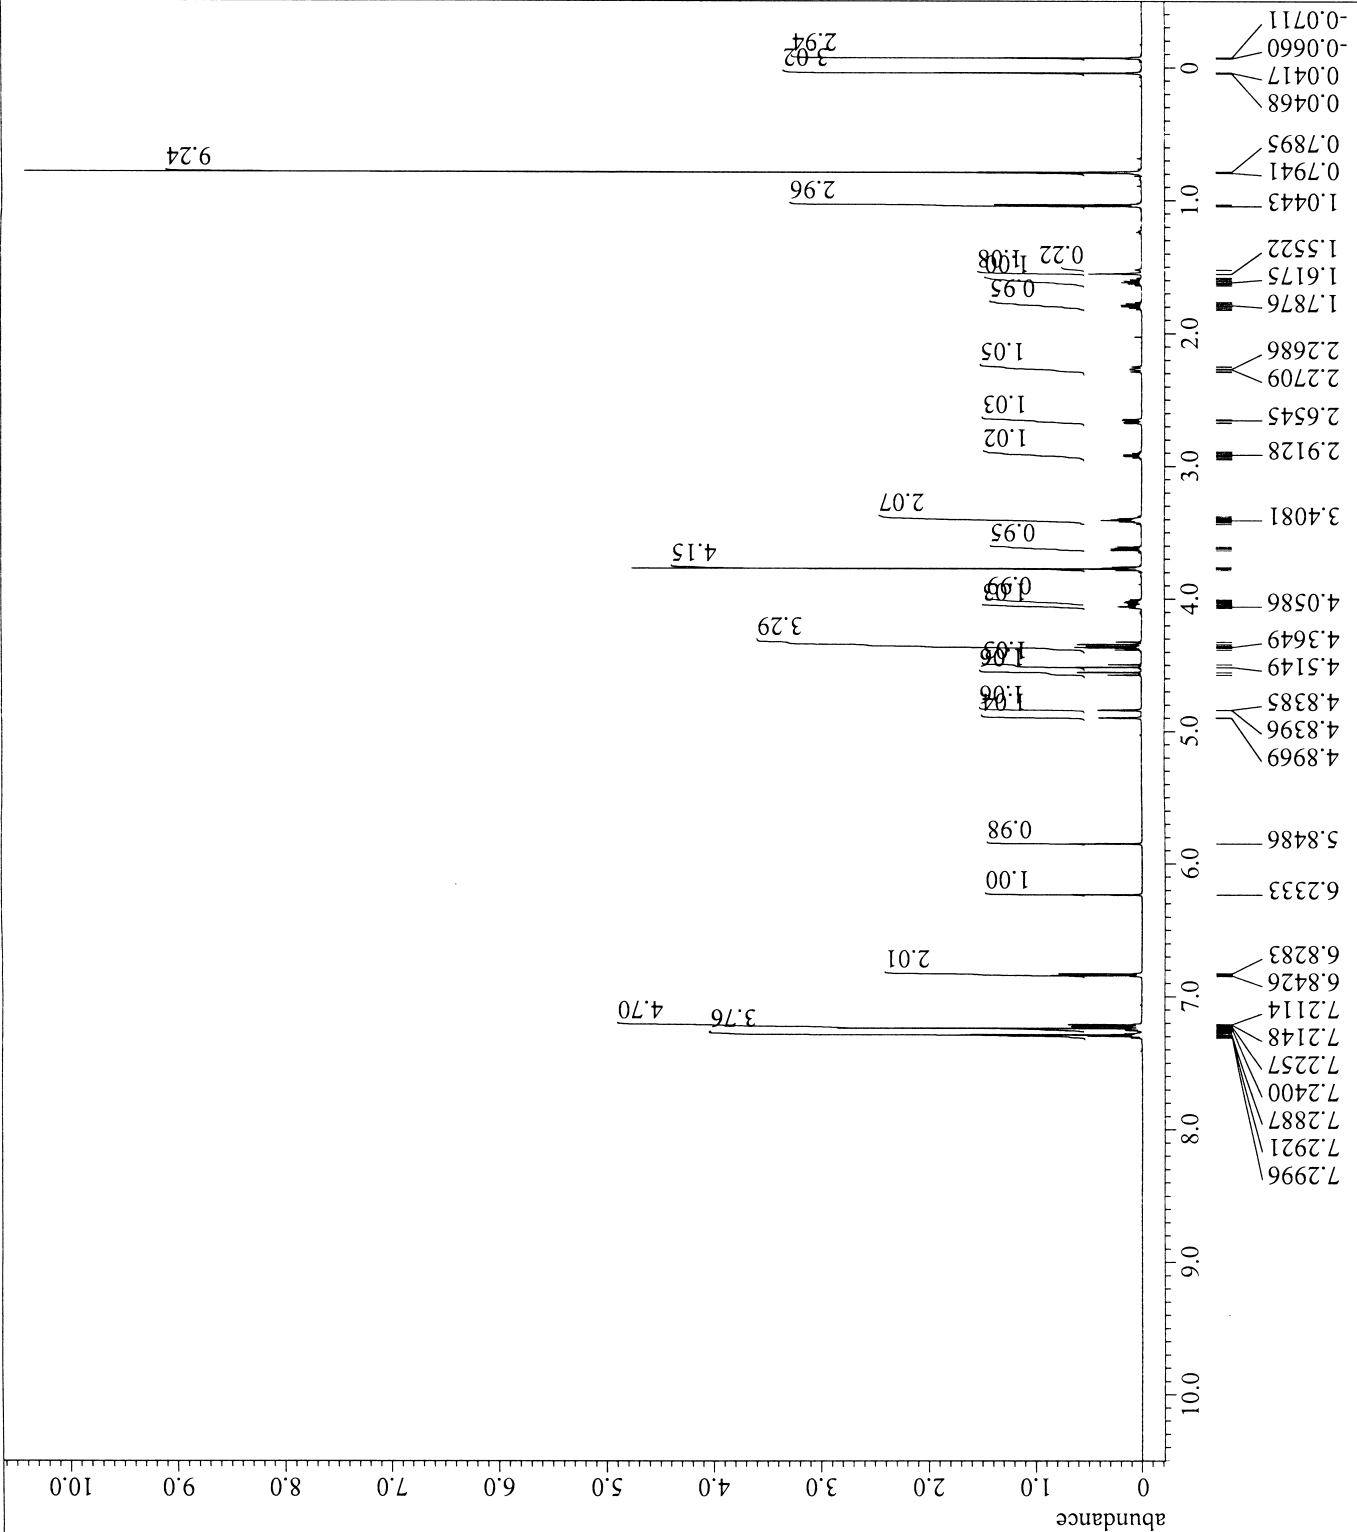

X : parts per Million : Proton : parts per Million



Filename = C:\Users\delta\Documents\J  
 Author = delta  
 Experiment = Proton.jxp  
 Sample\_Id = MN-III-149-2  
 Solvent = CHLOROFORM-D  
 Creation\_Time = 23-JUN-2010 19:58:28  
 Revision\_Time = 10-NOV-2010 21:19:37  
 Current\_Time = 10-NOV-2010 21:19:56

Comment = single\_pulse  
 Data\_Format = 1D COMPLEX  
 Dim\_Size = 26214  
 Dim\_Title = Proton  
 Dim\_Units = [ppm]  
 Dimensions = x  
 Site = ECA600  
 Spectrometer = DELTA2\_NMR

Field\_Strength = 14.09636928[T] (600[MHz])  
 X\_Acq\_Duration = 2.9097984[s]  
 X\_Domain = 1H  
 X\_Freq = 600.1723046[MHz]  
 X\_Offset = 5[ppm]  
 X\_Points = 32768  
 X\_Prescans = 1  
 X\_Resolution = 0.34366642[Hz]  
 X\_Sweep = 11.26126126[kHz]  
 X\_Sweep\_Clip = 9.00900901[kHz]  
 Irr\_Domain = Proton  
 Irr\_Freq = 600.1723046[MHz]  
 Irr\_Offset = 5[ppm]  
 Tri\_Domain = Proton  
 Tri\_Freq = 600.1723046[MHz]  
 Tri\_Offset = 5[ppm]  
 Clipped = FALSE  
 Scans = 8  
 Total\_Scans = 8

Relaxation\_Delay = 1[s]  
 Recvr\_Gain = 32  
 Temp\_Get = 22.6[deg]  
 X\_90\_Width = 12.4[us]  
 X\_Acq\_Time = 2.9097984[s]  
 X\_Angle = 45[deg]  
 X\_Atn = 3[deg]  
 X\_Pulse = 6.2[us]  
 Irr\_Mode = Off  
 Tri\_Mode = Off  
 Dante\_Preset = FALSE  
 Initial\_Wait = 1[s]  
 Repetition\_Time = 3.9097984[s]

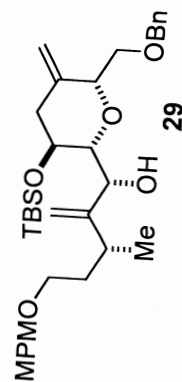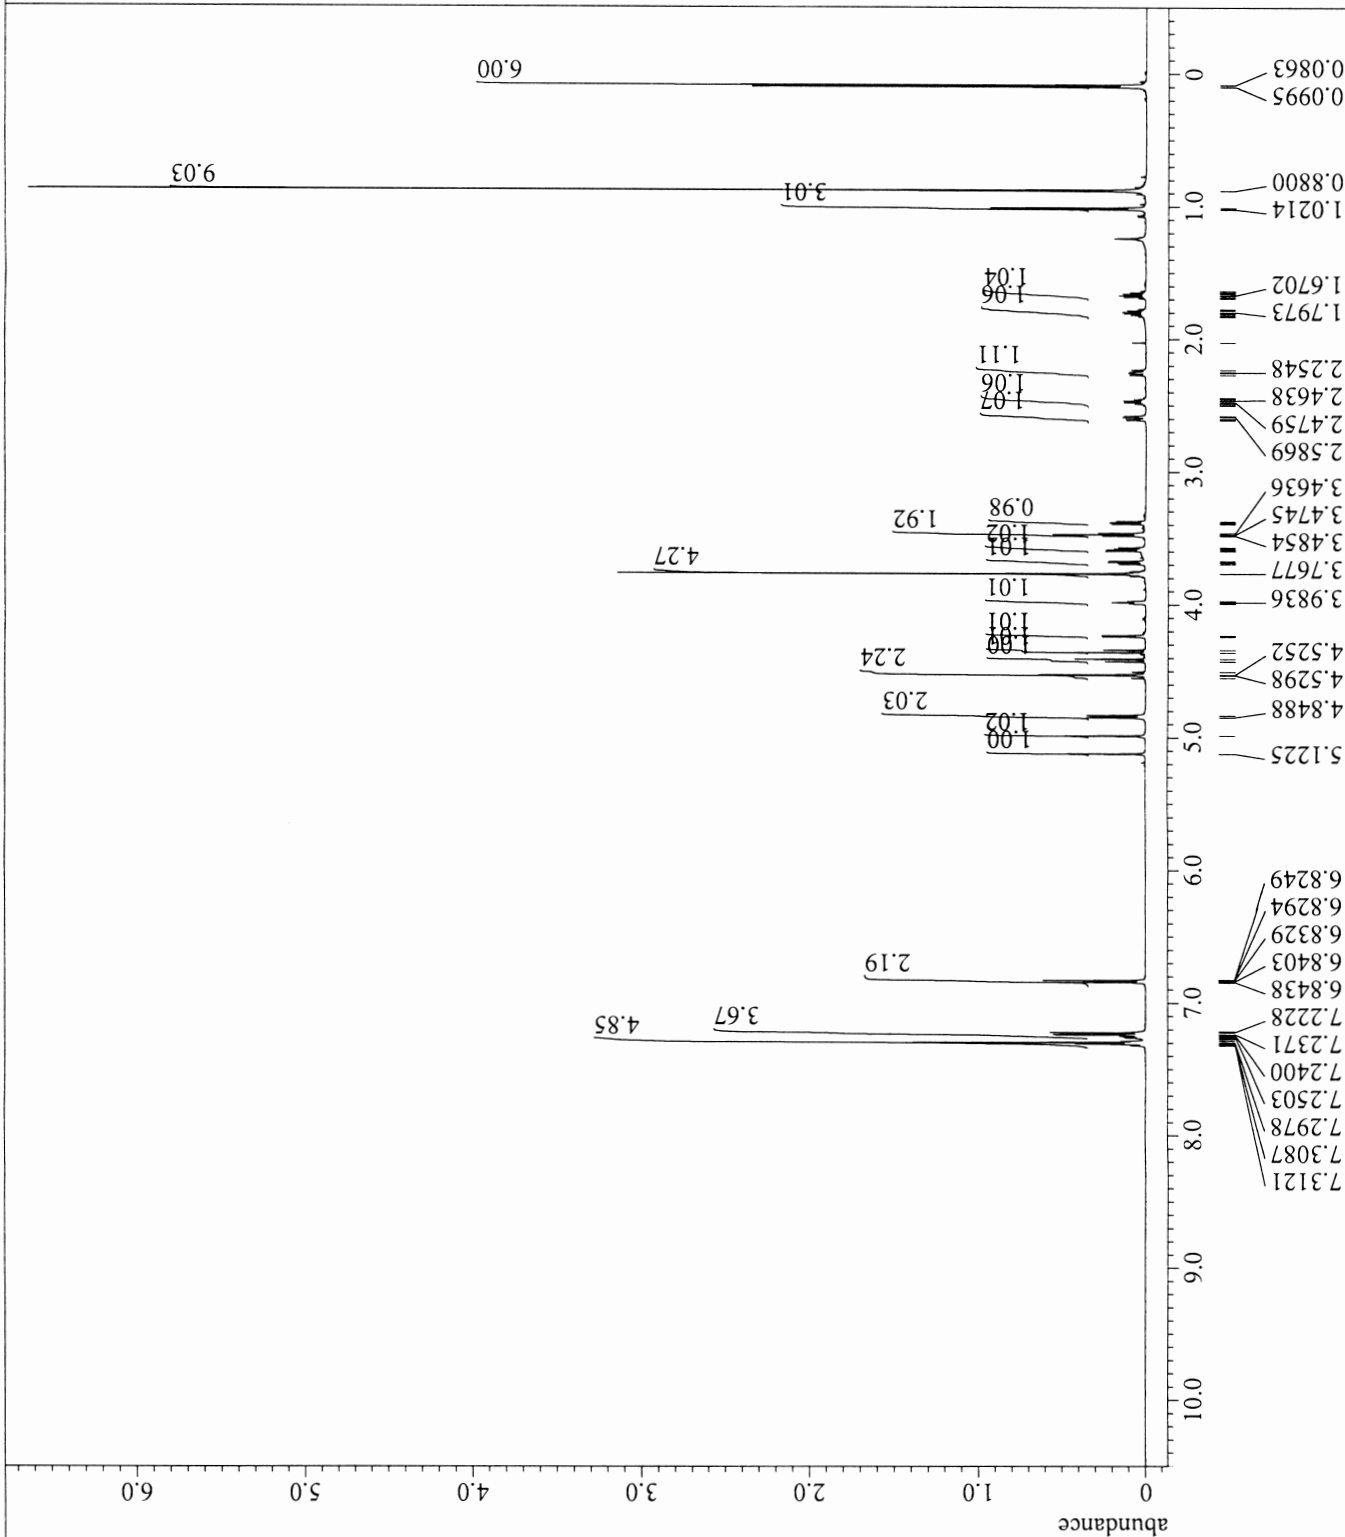

X : parts per Million : Proton : parts per Million

Filename = C:\Users\delta\Documents\J  
 Author = delta  
 Experiment = carbon.jpg  
 Sample\_Id = MN-III-149-2  
 Solvent = CHLOROFORM-D  
 Creation\_Time = 23-JUN-2010 20:04:49  
 Revision\_Time = 15-NOV-2010 12:31:02  
 Current\_Time = 15-NOV-2010 12:31:17  
 Comment = single pulse decoupled gat  
 Data\_Format = 1D COMPLEX  
 Dim\_Size = 26214  
 Dim\_Title = Carbon13  
 Dim\_Units = [ppm]  
 Dimensions = X  
 Site = ECA600  
 Spectrometer = DELTA2\_NMR  
 Field\_Strength = 14.09636928[T] (600 [MHz])  
 X\_Acq\_Duration = 0.69206016[s]  
 X\_Domain = 13C  
 X\_Freq = 150.91343039 [MHz]  
 X\_Offset = 100 [ppm]  
 X\_Points = 32768  
 X\_Prescans = 4  
 X\_Resolution = 1.44496109 [Hz]  
 X\_Sweep = 47.34848485 [kHz]  
 X\_Sweep\_Clip = 37.87878788 [kHz]  
 Irr\_Domain = Proton  
 Irr\_Freq = 600.1723046 [MHz]  
 Irr\_Offset = 5 [ppm]  
 Clipped = FALSE  
 Scans = 205.0  
 Total\_Scans = 205.0  
 Relaxation\_Delay = 2 [s]  
 Recvr\_Gain = 56  
 Temp\_Get = 23.4 [dC]  
 X\_90\_Width = 8.4 [us]  
 X\_Acq\_Time = 0.69206016 [s]  
 X\_Angle = 30 [deg]  
 X\_Atn = 6.4 [dB]  
 X\_Pulse = 2.8 [us]  
 Irr\_Atn\_Dec = 18 [dB]  
 Irr\_Atn\_Noise = 18 [dB]  
 Irr\_Noise = WALTZ  
 Irr\_Pwidth = 76 [us]  
 Decoupling = TRUE  
 Initial\_Wait = 1 [s]  
 Noe = TRUE  
 Noe\_Time = 2 [s]  
 Repetition\_Time = 2.69206016 [s]

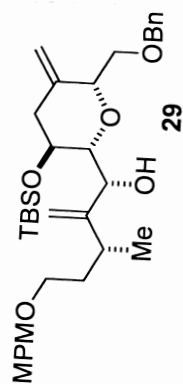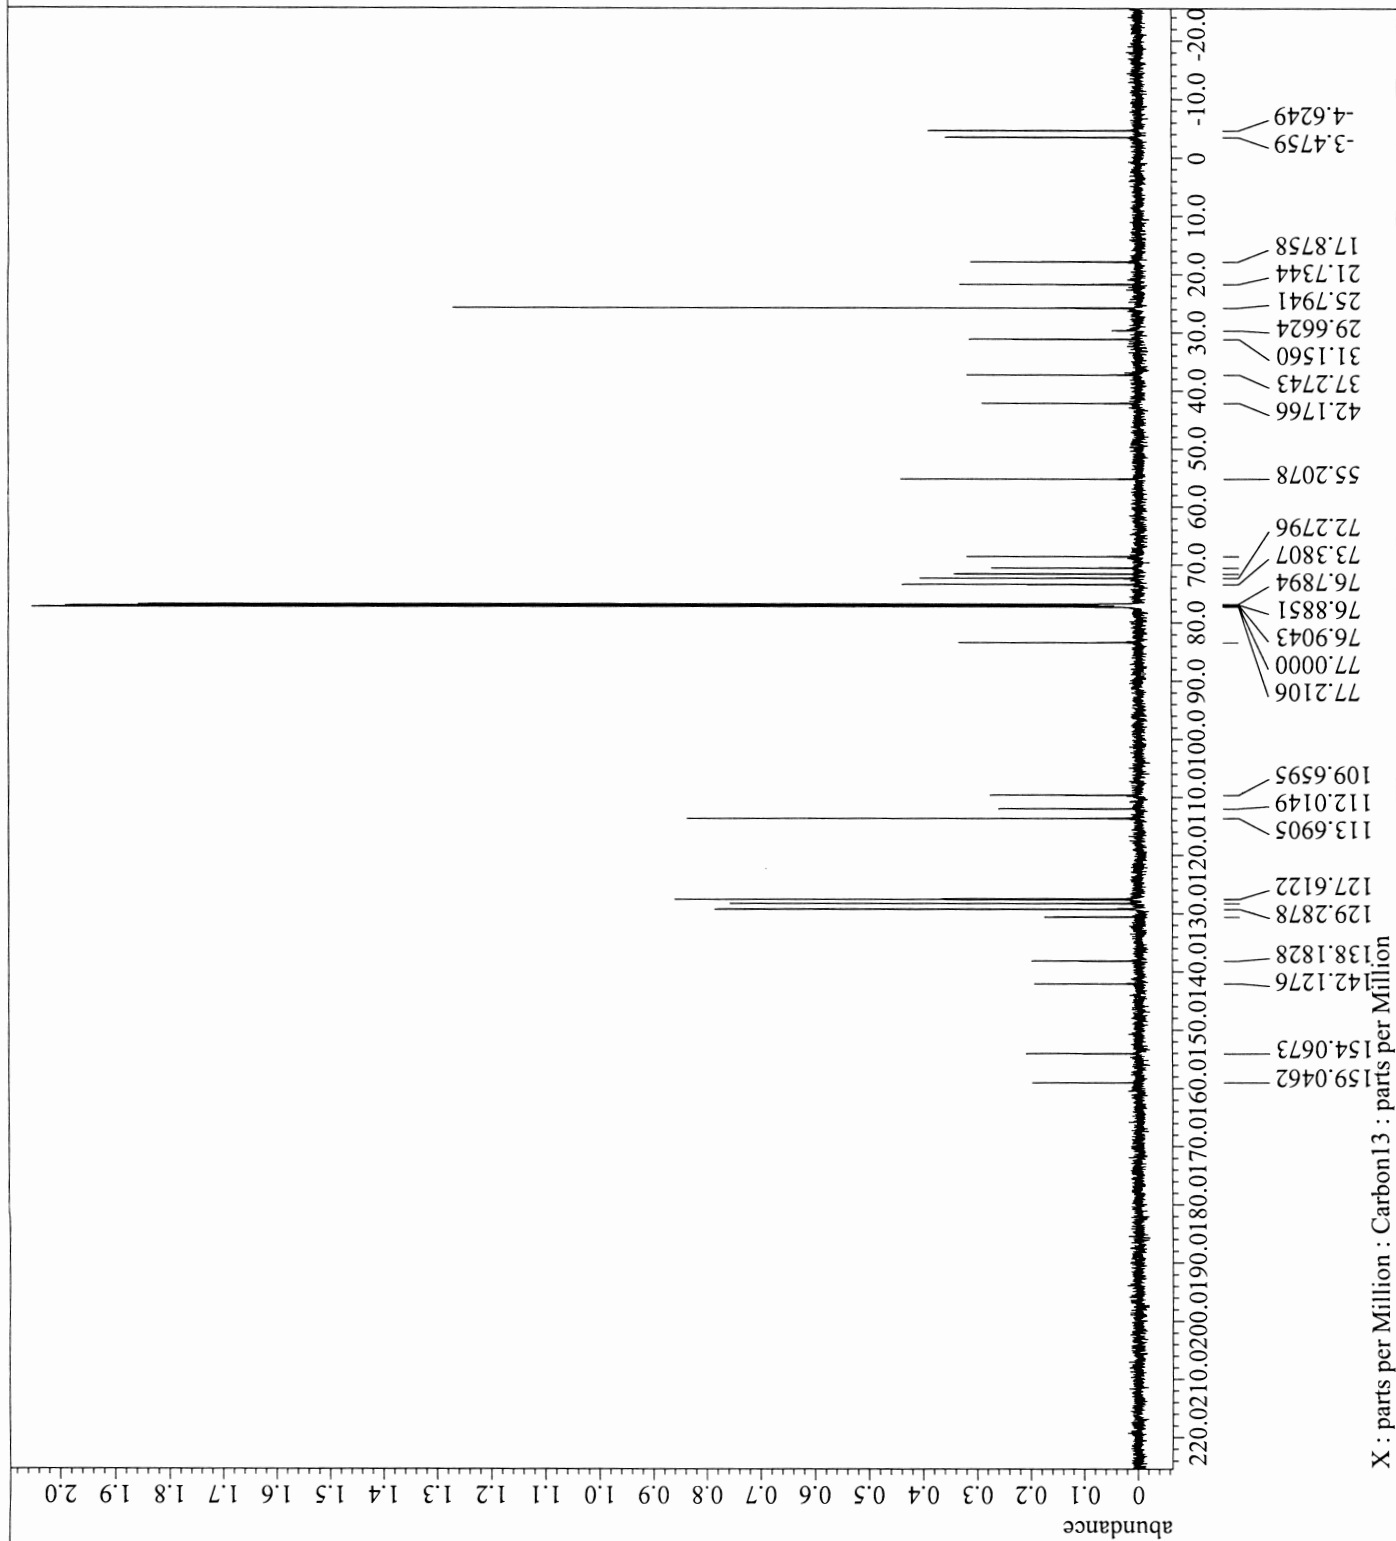

X : parts per Million : Carbon13 : parts per Million

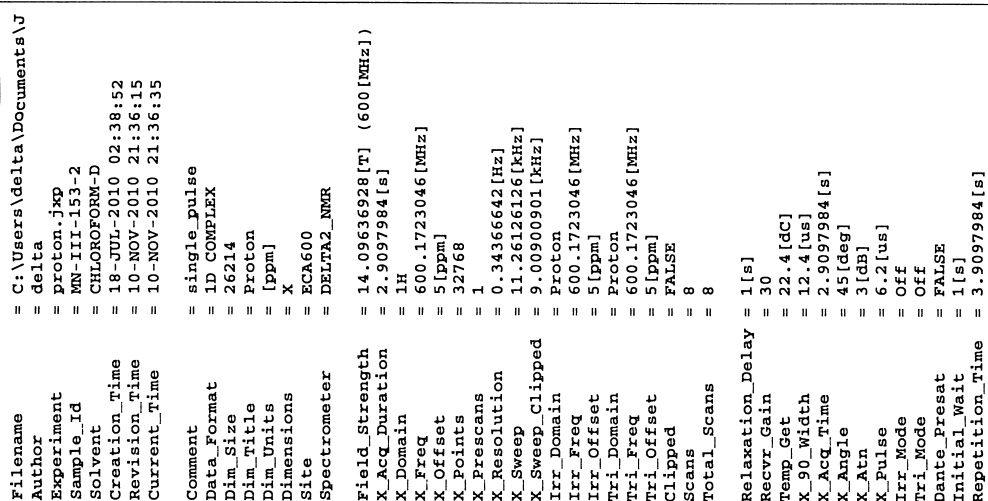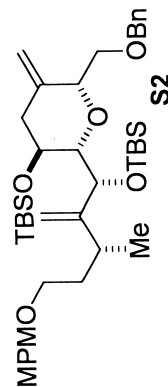

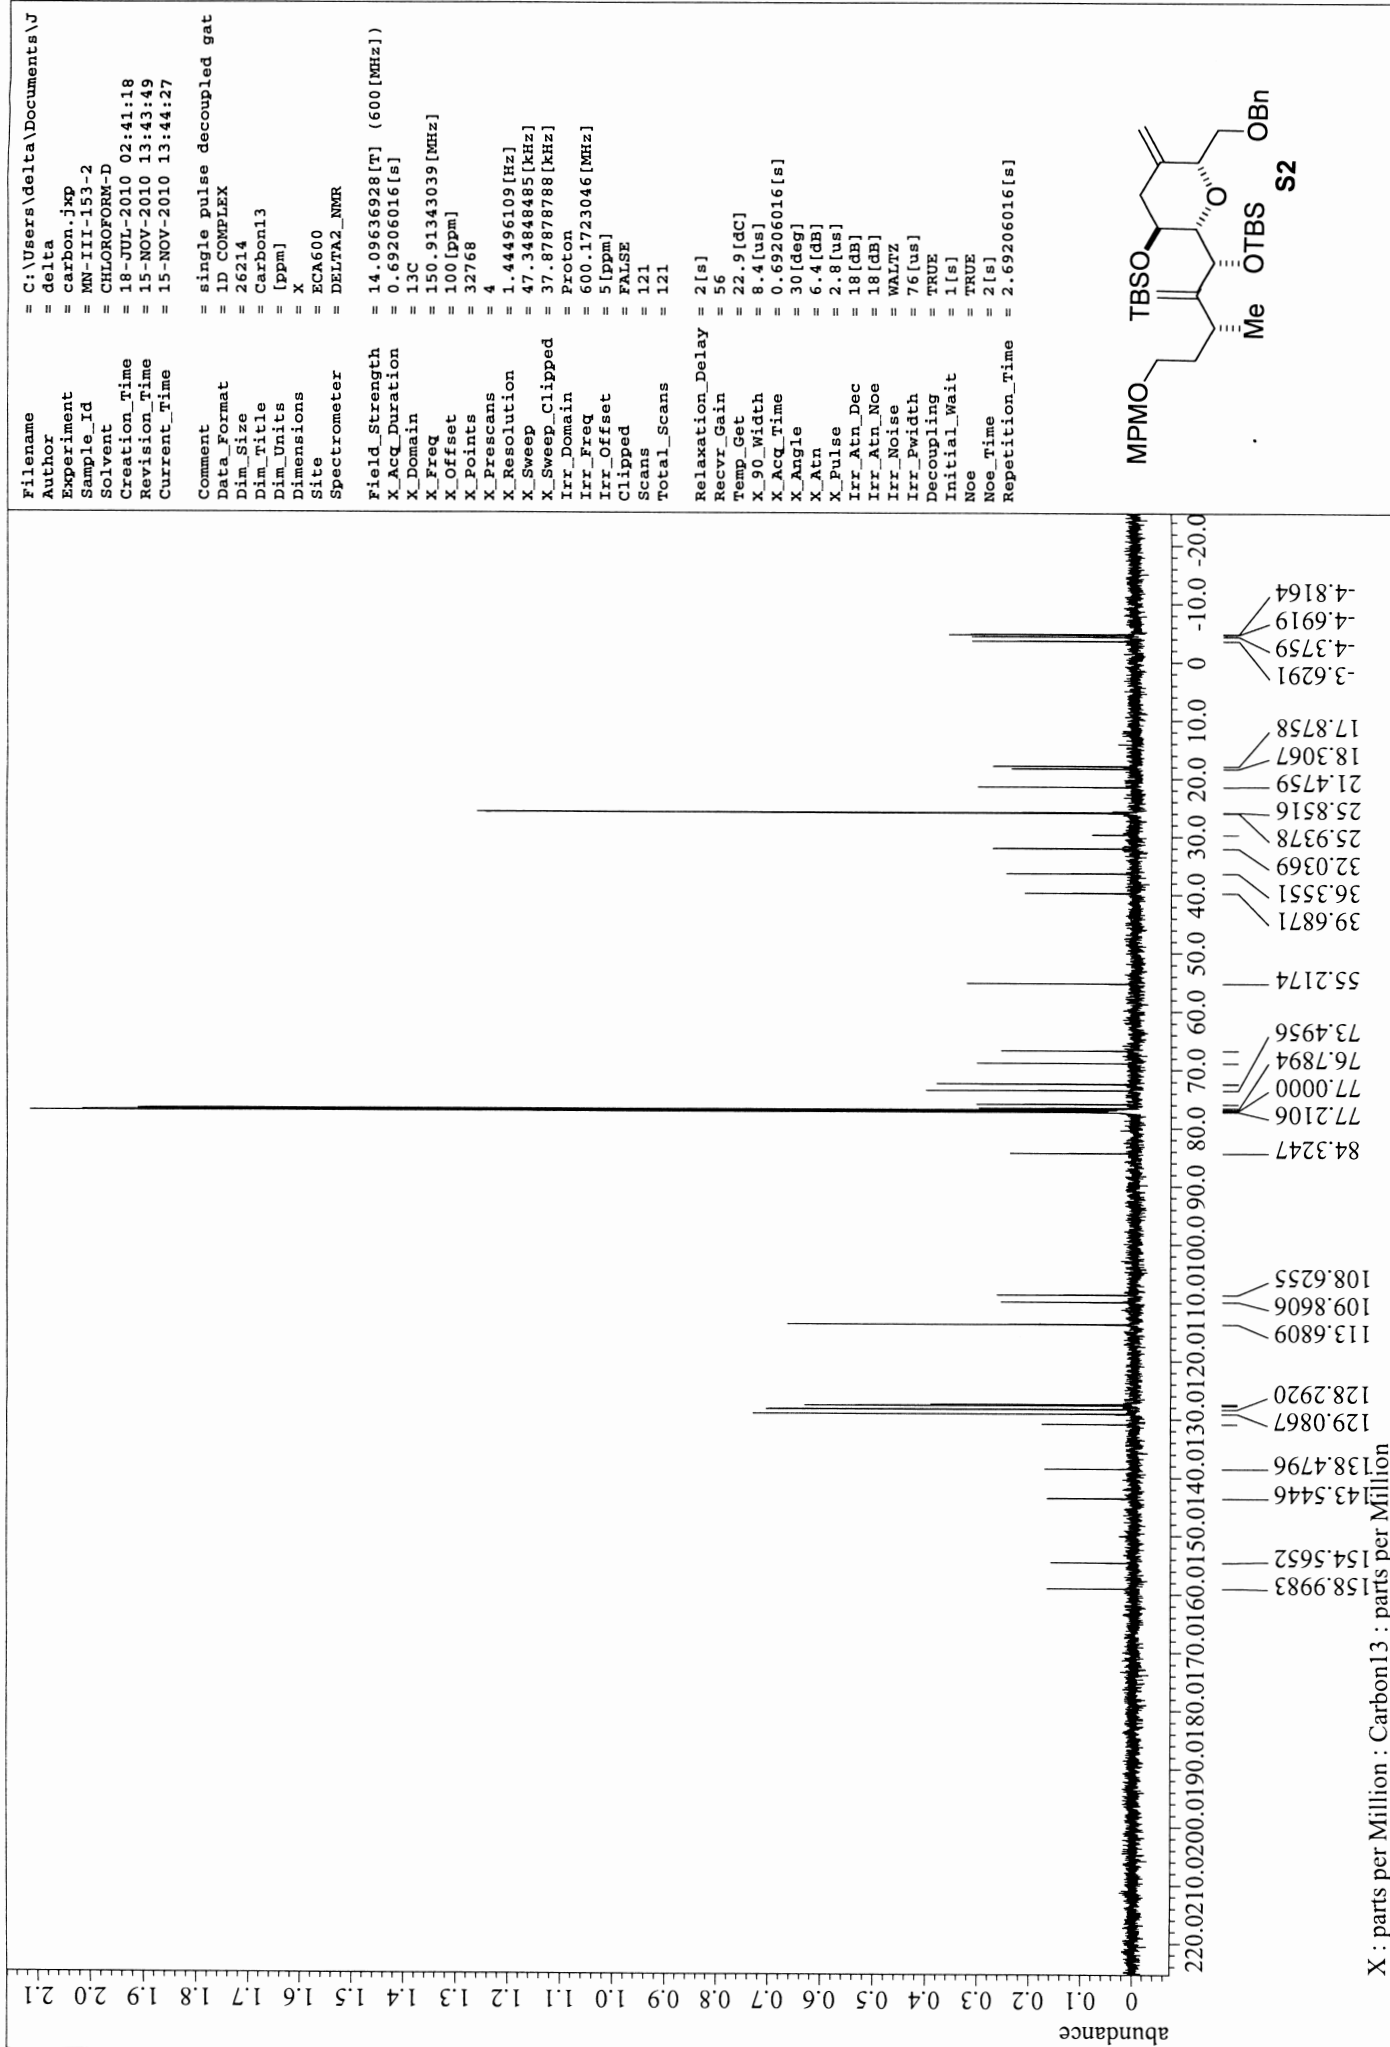





Filename = C:\Users\delta\Documents\J  
 Author = delta  
 Experiment = carbon.jpg  
 Sample\_Id = MN-III-154  
 Solvent = CHLOROFORM-D  
 Creation\_Time = 19-JUL-2010 00:21:47  
 Revision\_Time = 19-JUL-2010 00:35:42  
 Current\_Time = 19-JUL-2010 00:35:50  
 Comment = single pulse decoupled gat  
 Data\_Format = 1D COMPLEX  
 Dim\_Size = 26214  
 Dim\_Title = Carbon13  
 Dim\_Units = [ppm]  
 Dimensions = X  
 Site = ECA600  
 Spectrometer = DELTA2\_NMR  
 Field\_Strength = 14.09636928[T] (600[MHz])  
 X\_Acq\_Duration = 0.69206016[s]  
 X\_Domain = 13C  
 X\_Freq = 150.91343039[MHz]  
 X\_Offset = 100[ppm]  
 X\_Points = 32768  
 X\_Prescans = 4  
 X\_Resolution = 1.44496109[Hz]  
 X\_Sweep = 47.34848485[kHz]  
 X\_Sweep\_Clipped = 37.87878788[kHz]  
 Irr\_Domain = Proton  
 Irr\_Freq = 600.1723046[MHz]  
 Irr\_Offset = 5[ppm]  
 Clipped = FALSE  
 Mod\_Return = 1  
 Probe\_Recovery = 20[us]  
 Scans = 181  
 Total\_Scans = 181  
 X\_90\_Width = 8.4[us]  
 X\_Acq\_Time = 0.69206016[s]  
 X\_Angle = 30[deg]  
 X\_Atn = 6.4[db]  
 X\_Pulse = 2.8[us]  
 Irr\_Atn\_Dec = 18[db]  
 Irr\_Atn\_Noe = 18[db]  
 Irr\_Noise = WALTZ  
 Irr\_Pwidth = 76[us]  
 Decoupling = TRUE  
 Initial\_Wait = 1[s]  
 Noe = TRUE  
 Noe\_Time = 2[s]  
 Recvr\_Gain = 56  
 Relaxation\_Delay = 2[s]  
 Repetition\_Time = 2.69206016[s]  
 Temp\_Get = 23[dc]

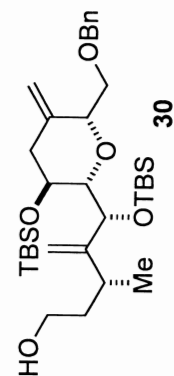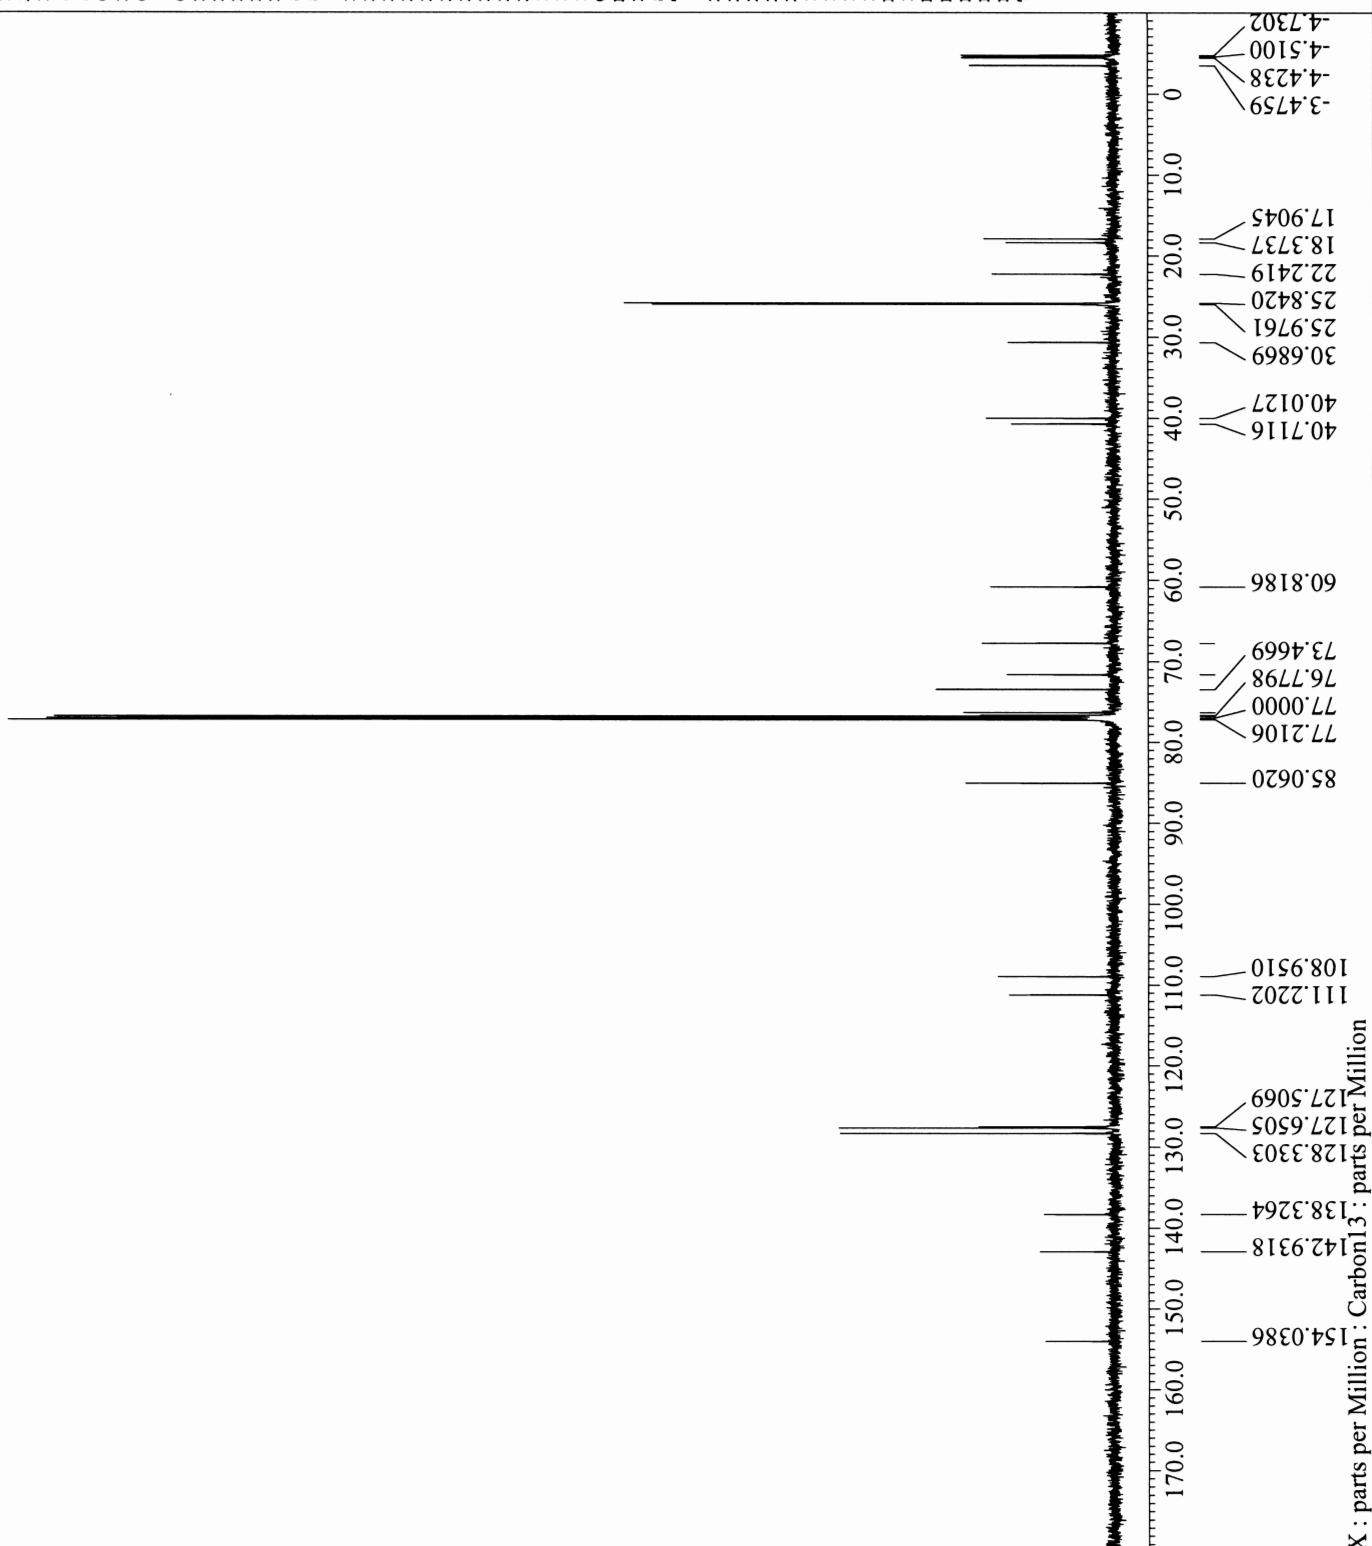

X : parts per Million : Carbon13 : parts per Million

Filename = C:\Users\delta\Documents\J  
 Author = delta  
 Experiment = proton.jpg  
 Sample\_Id = MN-III-158  
 Solvent = CHLOROFORM-D  
 Creation\_Time = 23-JUL-2010 18:06:39  
 Revision\_Time = 23-JUL-2010 18:13:40  
 Current\_Time = 23-JUL-2010 18:14:09  
 Comment = single\_pulse  
 Data\_Format = 1D COMPLEX  
 Dim\_Size = 26214  
 Dim\_Title = Proton  
 Dim\_Units = [ppm]  
 Dimensions = X  
 Site = ECA600  
 Spectrometer = DELTA2\_NMR  
 Field\_Strength = 14.09636928[T] (600 [MHz])  
 X\_Acq\_Duration = 2.9097984[s]  
 X\_Domain = 1H  
 X\_Freq = 600.1723046 [MHz]  
 X\_Offset = 5 [ppm]  
 X\_Points = 32768  
 X\_Prescans = 1  
 X\_Resolution = 0.34366642 [Hz]  
 X\_Sweep = 11.26126126 [kHz]  
 X\_Sweep\_Clippped = 9.00900901 [kHz]  
 Irr\_Domain = Proton  
 Irr\_Freq = 600.1723046 [MHz]  
 Irr\_Offset = 5 [ppm]  
 Tri\_Domain = Proton  
 Tri\_Freq = 600.1723046 [MHz]  
 Tri\_Offset = 5 [ppm]  
 Clipped = FALSE  
 Mod\_Return = 1  
 Probe\_Recovery = 5 [us]  
 Scans = 8  
 Total\_Scans = 8  
 X\_90\_Width = 12.4 [us]  
 X\_Acq\_Time = 2.9097984 [s]  
 X\_Angle = 45 [deg]  
 X\_Atn = 3 [dB]  
 X\_Pulse = 6.2 [us]  
 Irr\_Mode = Off  
 Tri\_Mode = Off  
 Dante\_Presat = FALSE  
 Initial\_Wait = 1 [s]  
 Recvr\_Gain = 36  
 Relaxation\_Delay = 1 [s]  
 Repetition\_Time = 3.9097984 [s]  
 Temp\_Get = 22.5 [dc]

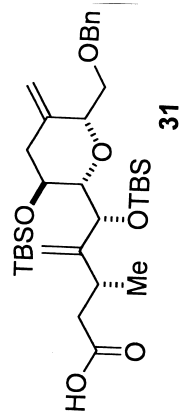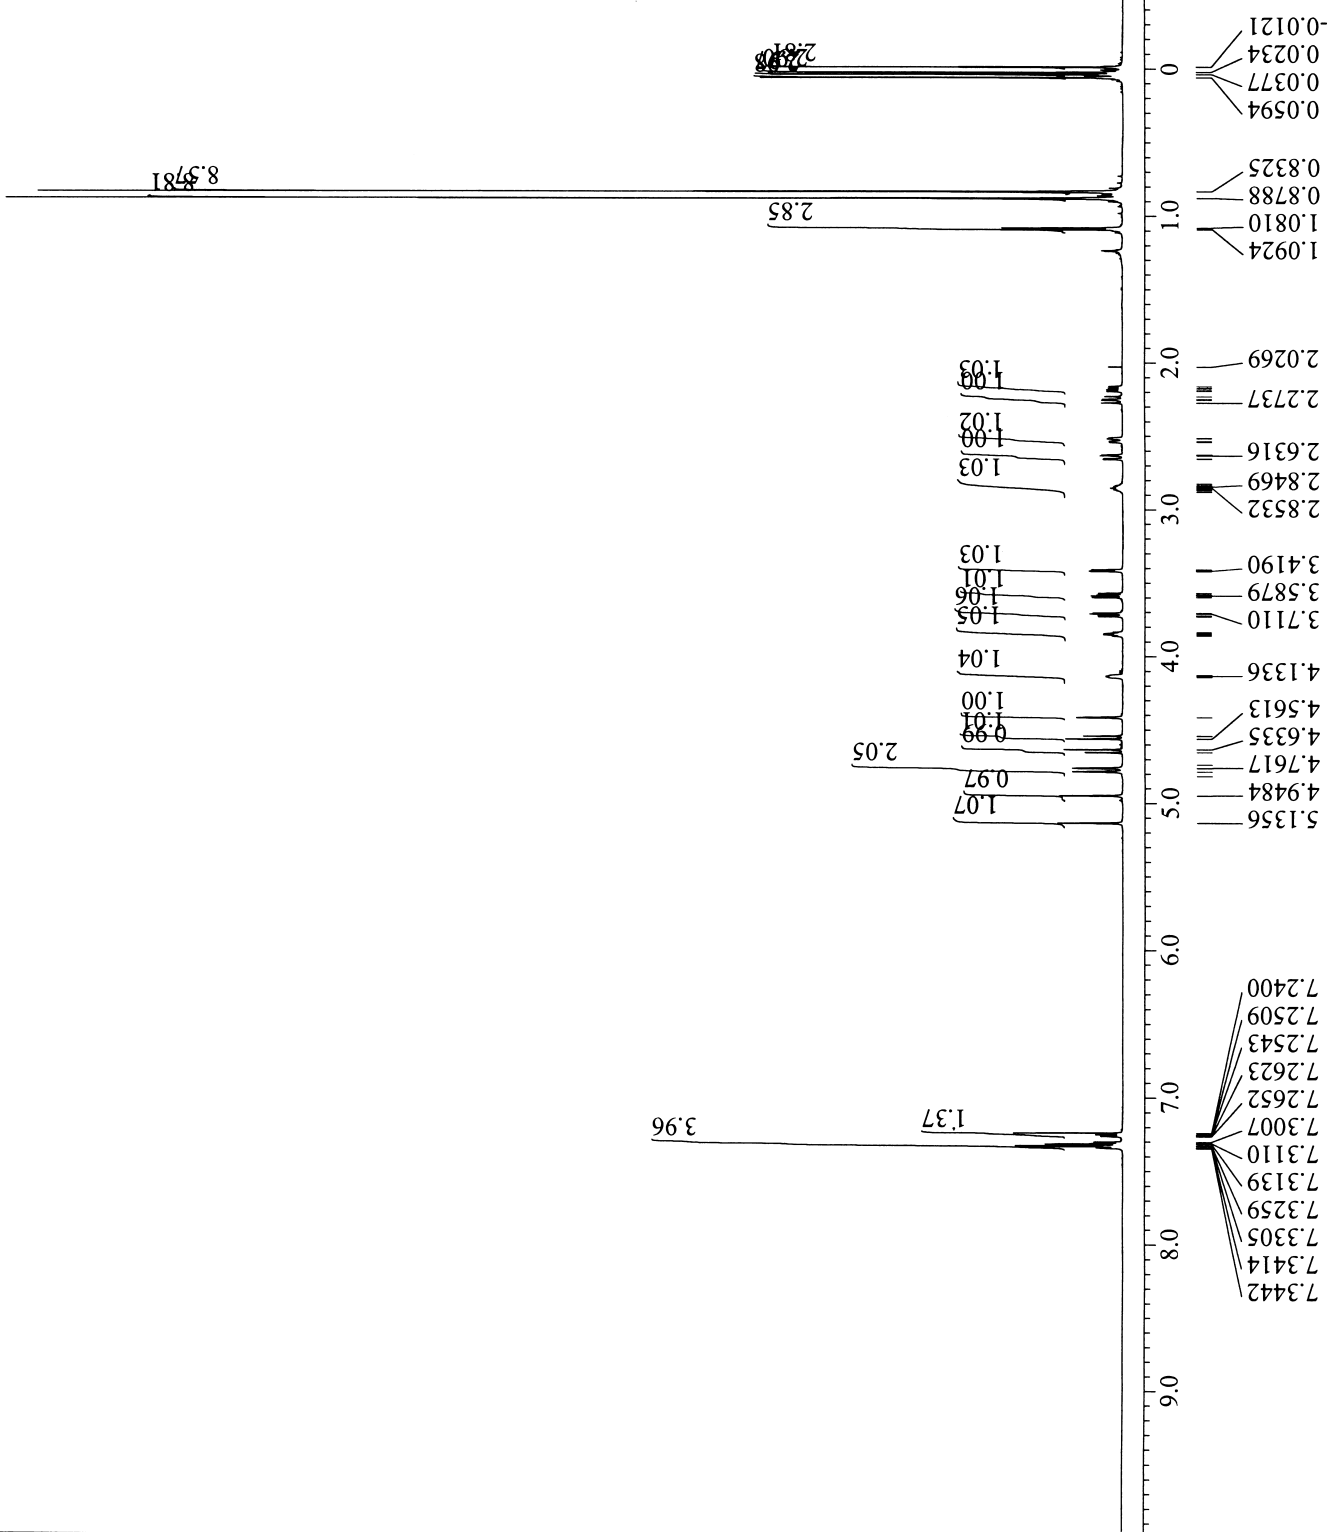

X : parts per Million : Proton : parts per Million

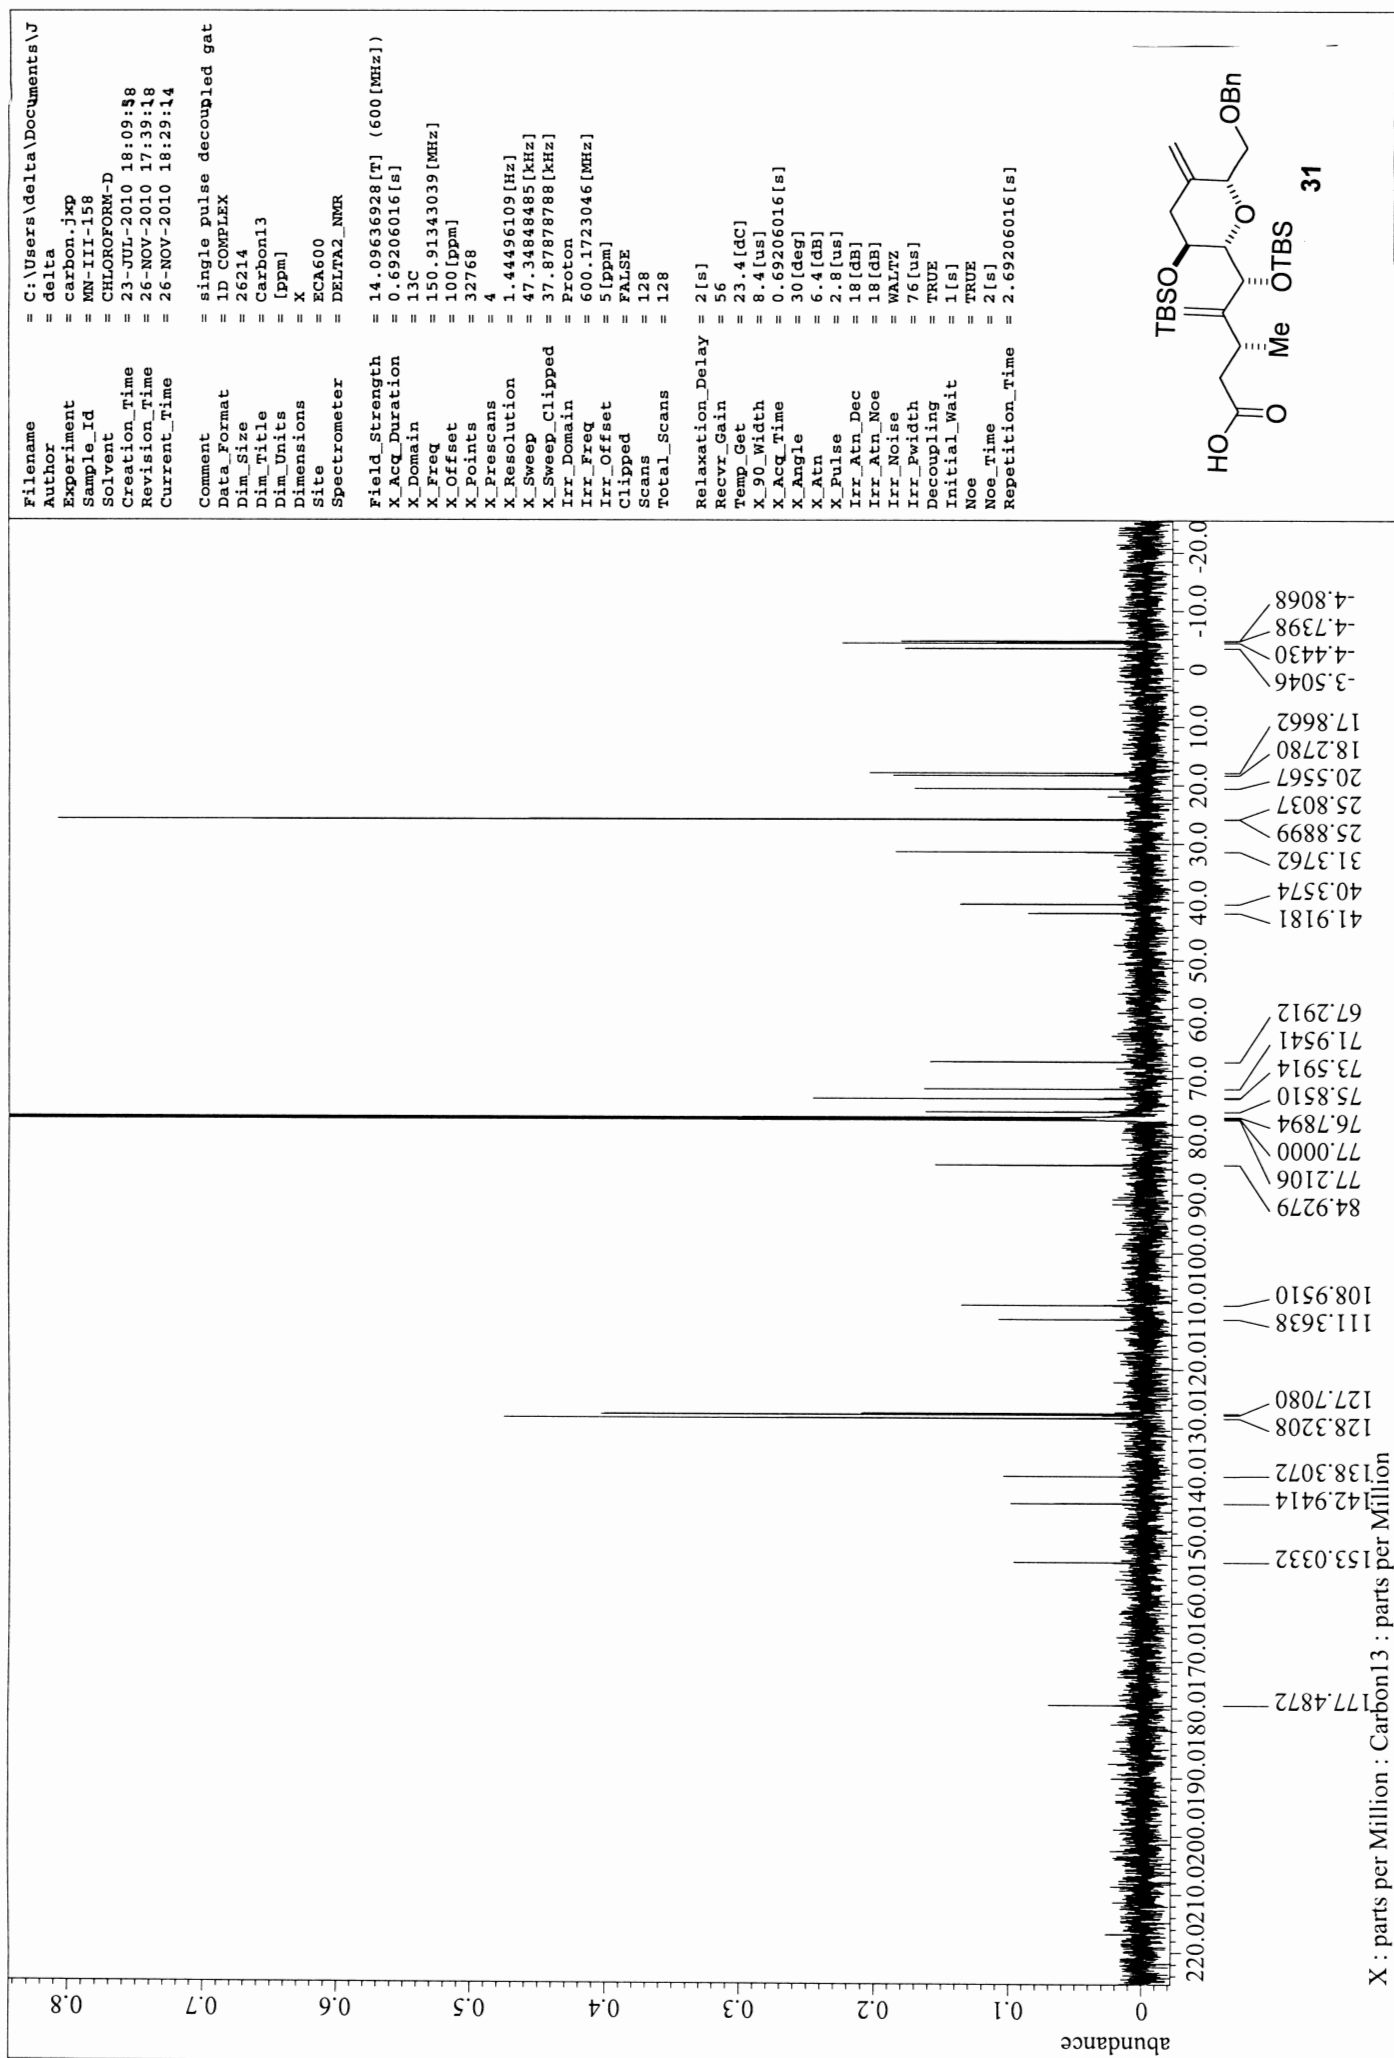

Filename = C:\Users\delta\Documents\J  
 Author = delta  
 Experiment = proton.jpg  
 Sample\_Id = MN-III-160  
 Solvent = CHLOROFORM-D  
 Creation\_Time = 28-JUL-2010 13:26:18  
 Revision\_Time = 28-JUL-2010 13:29:12  
 Current\_Time = 28-JUL-2010 13:29:22  
 Comment = single\_pulse  
 Data\_Format = 1D COMPLEX  
 Dim\_Size = 26214  
 Dim\_Title = Proton  
 Dim\_Units = [ppm]  
 Dimensions = x  
 Site = ECA600  
 Spectrometer = DELTA2\_NMR  
 Field\_Strength = 14.09636928[T] (600[MHz])  
 X\_Acq\_Duration = 2.9097984[s]  
 X\_Domain = 1H  
 X\_Freq = 600.1723046[MHz]  
 X\_Offset = 5[ppm]  
 X\_Points = 32768  
 X\_Prescans = 1  
 X\_Resolution = 0.34366642[Hz]  
 X\_Sweep = 11.26126126[kHz]  
 X\_Sweep\_Clipped = 9.00900901[MHz]  
 Irr\_Domain = Proton  
 Irr\_Freq = 600.1723046[MHz]  
 Irr\_Offset = 5[ppm]  
 Tri\_Domain = Proton  
 Tri\_Freq = 600.1723046[MHz]  
 Tri\_Offset = 5[ppm]  
 Clipped = FALSE  
 Mod\_Return = 1  
 Probe\_Recovery = 5[us]  
 Scans = 8  
 Total\_Scans = 8  
 X\_90\_Width = 12.4[us]  
 X\_Acq\_Time = 2.9097984[s]  
 X\_Angle = 45[deg]  
 X\_Atn = 3[db]  
 X\_Pulse = 6.2[us]  
 Irr\_Mode = Off  
 Tri\_Mode = Off  
 Dante\_Preset = FALSE  
 Initial\_Wait = 1[s]  
 Recvr\_Gain = 34  
 Relaxation\_Delay = 1[s]  
 Repetition\_Time = 3.9097984[s]  
 Temp\_Get = 22.6[dc]

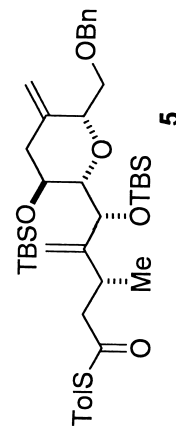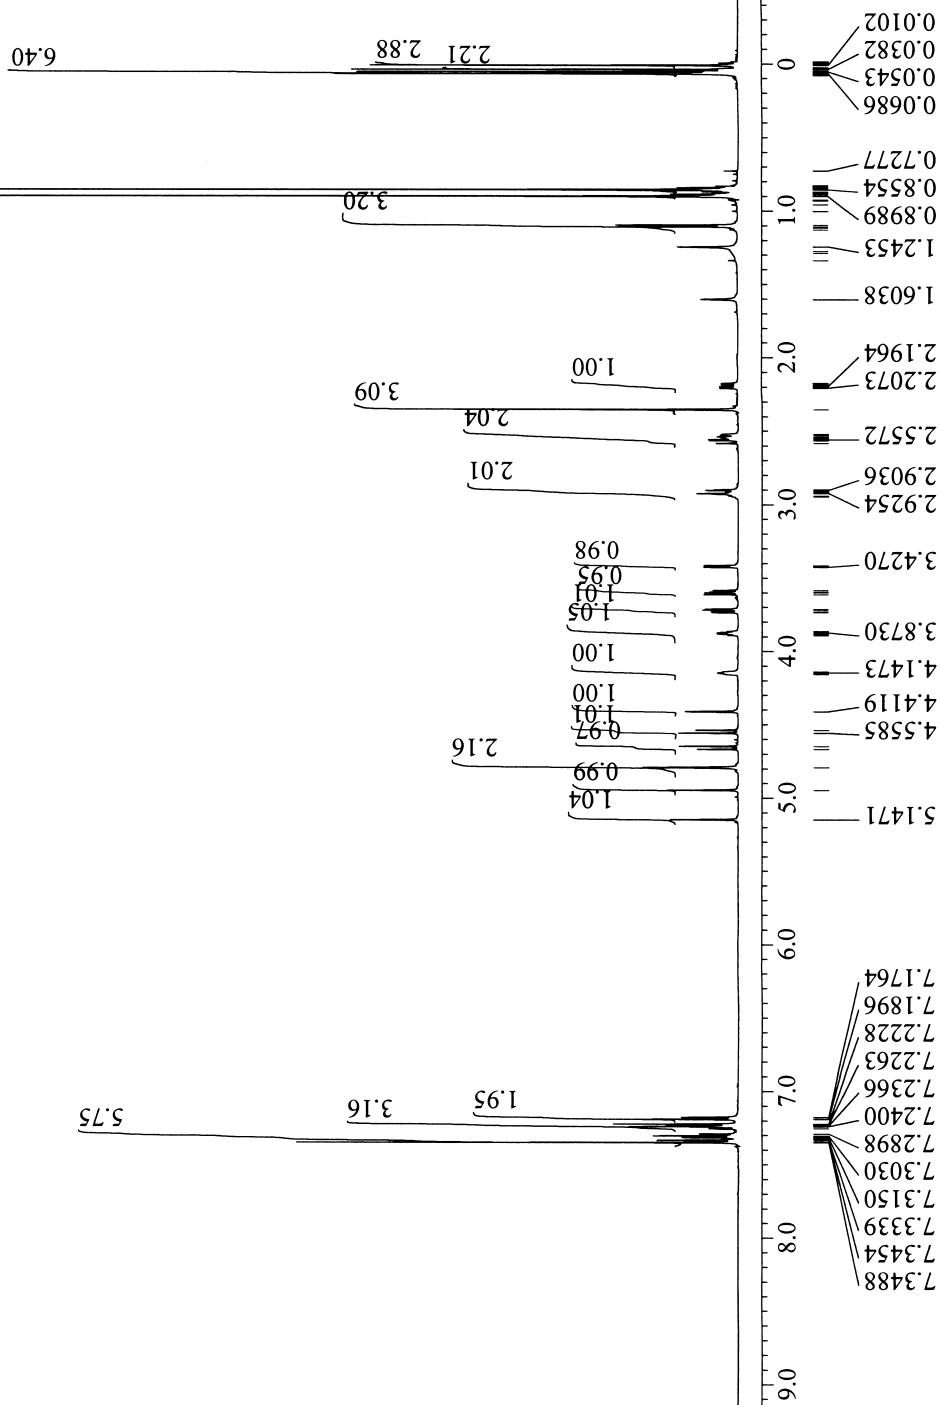

X : parts per Million : Proton : parts per Million

```

Filename = C:\Users\delta\Documents\J
Author = delta
Experiment = carbon.jpg
Sample_Id = MN-III-160
Solvent = CHLOROFORM-D
Creation_Time = 28-JUL-2010 13:28:36
Revision_Time = 28-JUL-2010 13:37:09
Current_Time = 28-JUL-2010 13:37:43

Comment = single pulse decoupled gat
Data_Format = 1D COMPLEX
Dim_Size = 26214
Dim_Title = Carbon13
Dim_Units = [ppm]
Dimensions = X
Site = ECA600
Spectrometer = DELTA2_NMR

Field_Strength = 14.09636928[T] (600[MHz])
X_Acq_Duration = 0.69206016[s]
X_Domain = 13C
X_Freq = 150.91343039[MHz]
X_Offset = 100[ppm]
X_Points = 32768
X_Prescans = 4
X_Resolution = 1.44496109[Hz]
X_Sweep = 47.34848485[kHz]
X_Sweep_Clipped = 37.87878788[kHz]
Irr_Domain = Proton
Irr_Freq = 600.1723046[MHz]
Irr_Offset = 5[ppm]
Clipped = FALSE
Mod_Return = 1
Probe_Recovery = 20[us]
Scans = 196
Total_Scans = 196

X_90_Width = 8.4[us]
X_Acq_Time = 0.69206016[s]
X_Angle = 30[deg]
X_Atn = 6.4[dB]
X_Pulse = 2.8[us]
Irr_Atn_Dec = 18[dB]
Irr_Atn_Noe = 18[dB]
Irr_Noise = WALTZ
Irr_Pwidth = 76[us]
Decoupling = TRUE
Initial_Wait = 1[s]
Noe = TRUE
Noe_Time = 2[s]
Recvr_Gain = 56
Relaxation_Delay = 2[s]
Repetition_Time = 2.69206016[s]
Temp_Get = 23.4[dc]

```

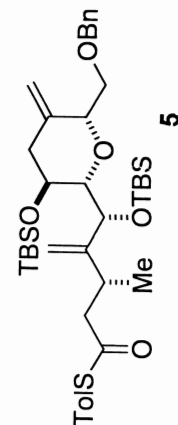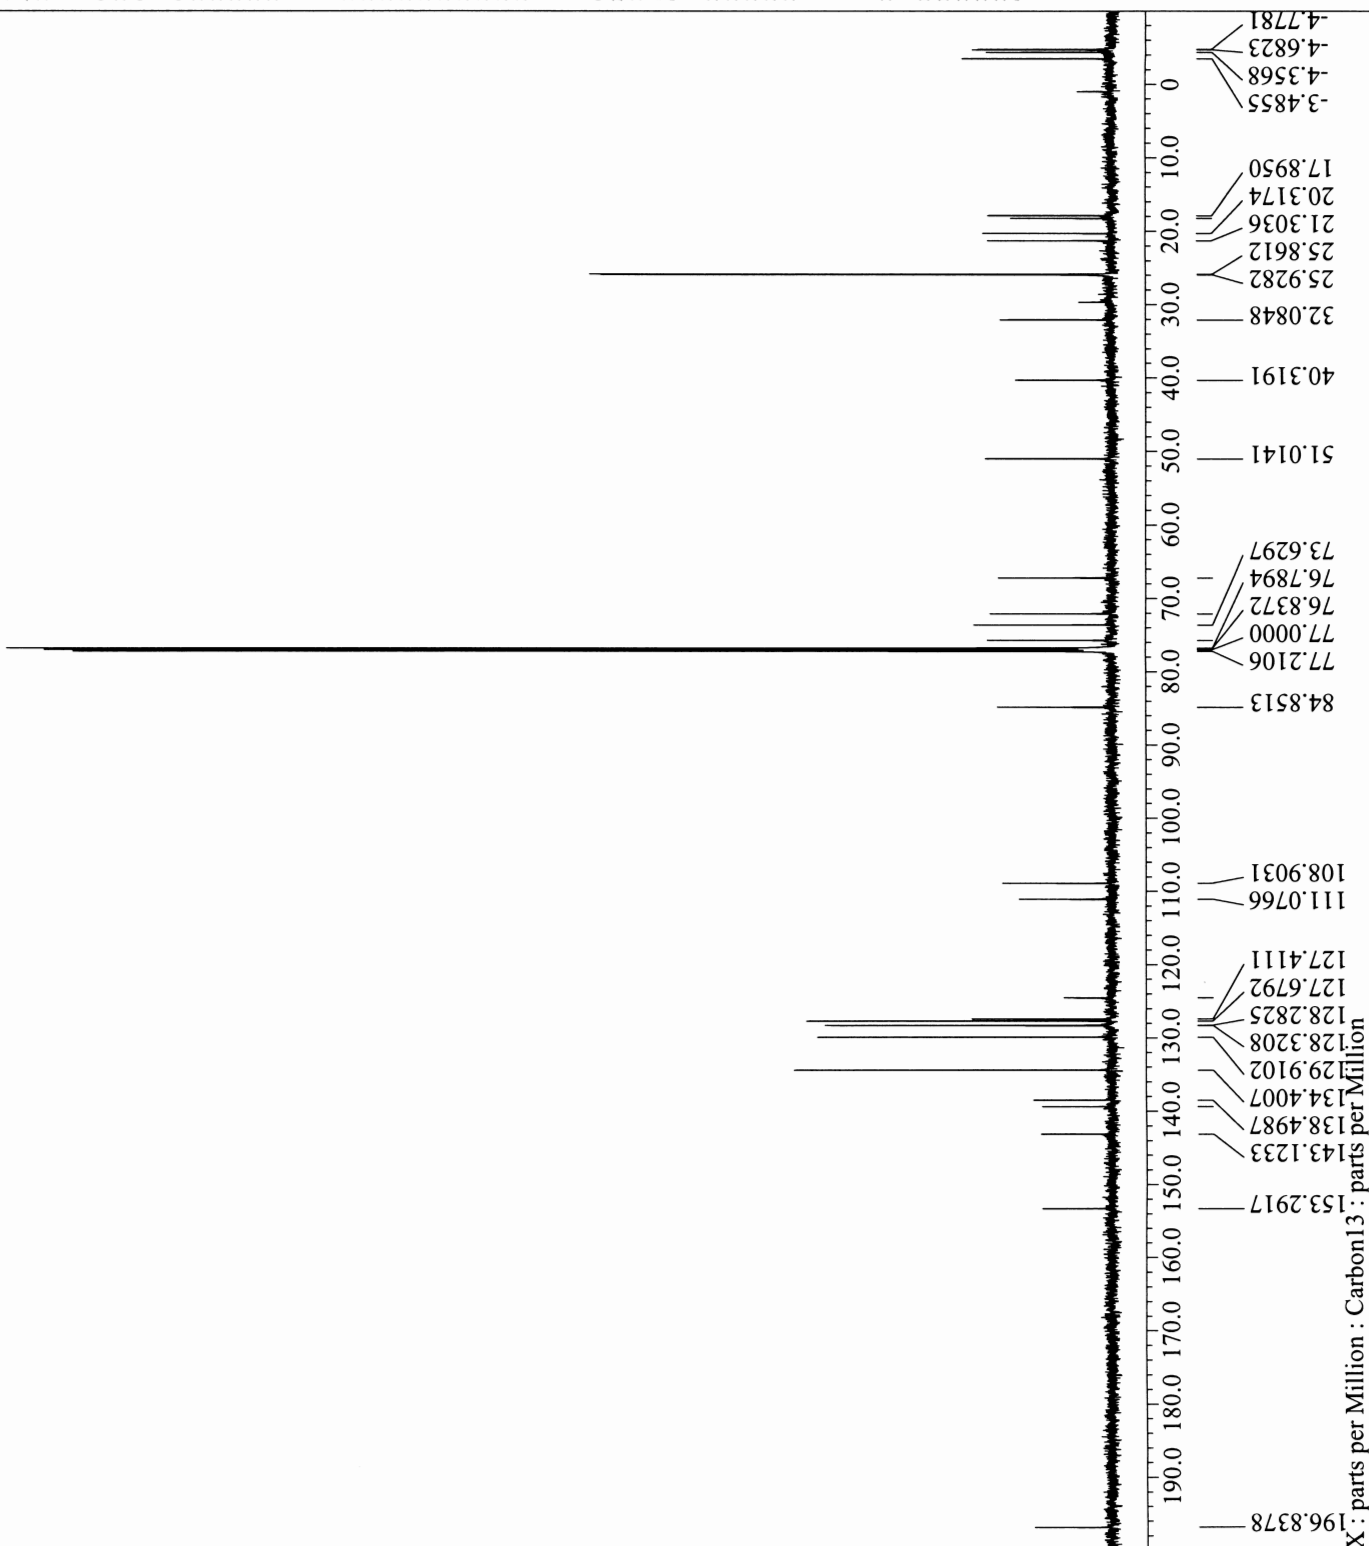

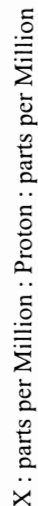

```

= C:\Users\delta\Documents\
= delta
= proton.jxp
= MN-III-163
= CHLOROFORM-D
= 5-AUG-2010 19:59:47
= 25-NOV-2010 13:06:43
= 25-NOV-2010 13:07:02

= single_pulse
= 1D COMPLEX
= 26214
= proton
= [ppm]
= X
= ECA600
= DELTA2_NMR

= 14.09636928[T] (600[MHz])
= 1H
= 600.1723046[MHz]
= 5[ppm]
= 32768
= 1
= 0.34366642[Hz]
= 11.26126126[kHz]
= 9.00900901[kHz]
= proton
= 600.1723046[MHz]
= 5[ppm]
= 600.1723046[MHz]
= 5[ppm]
= FALSE
= 8
= 8

Relaxation_Delay = 1[s]
Recvr_Gain = 34
Temp_Get = 22.7[dc]
X.X_90_Width = 12.4[us]
X.X_Acq_Time = 2.9097984[s]
X_Angle = 45[deg]
X_Atn = 3[db]
X_Pulse = 6.2[us]
= Off
= Off
= Off
Dante_Presat = FALSE
Initial_Wait = 1[s]
Repetition_Time = 3.9097984[s]

```

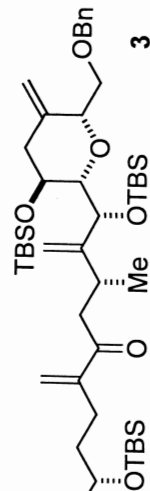

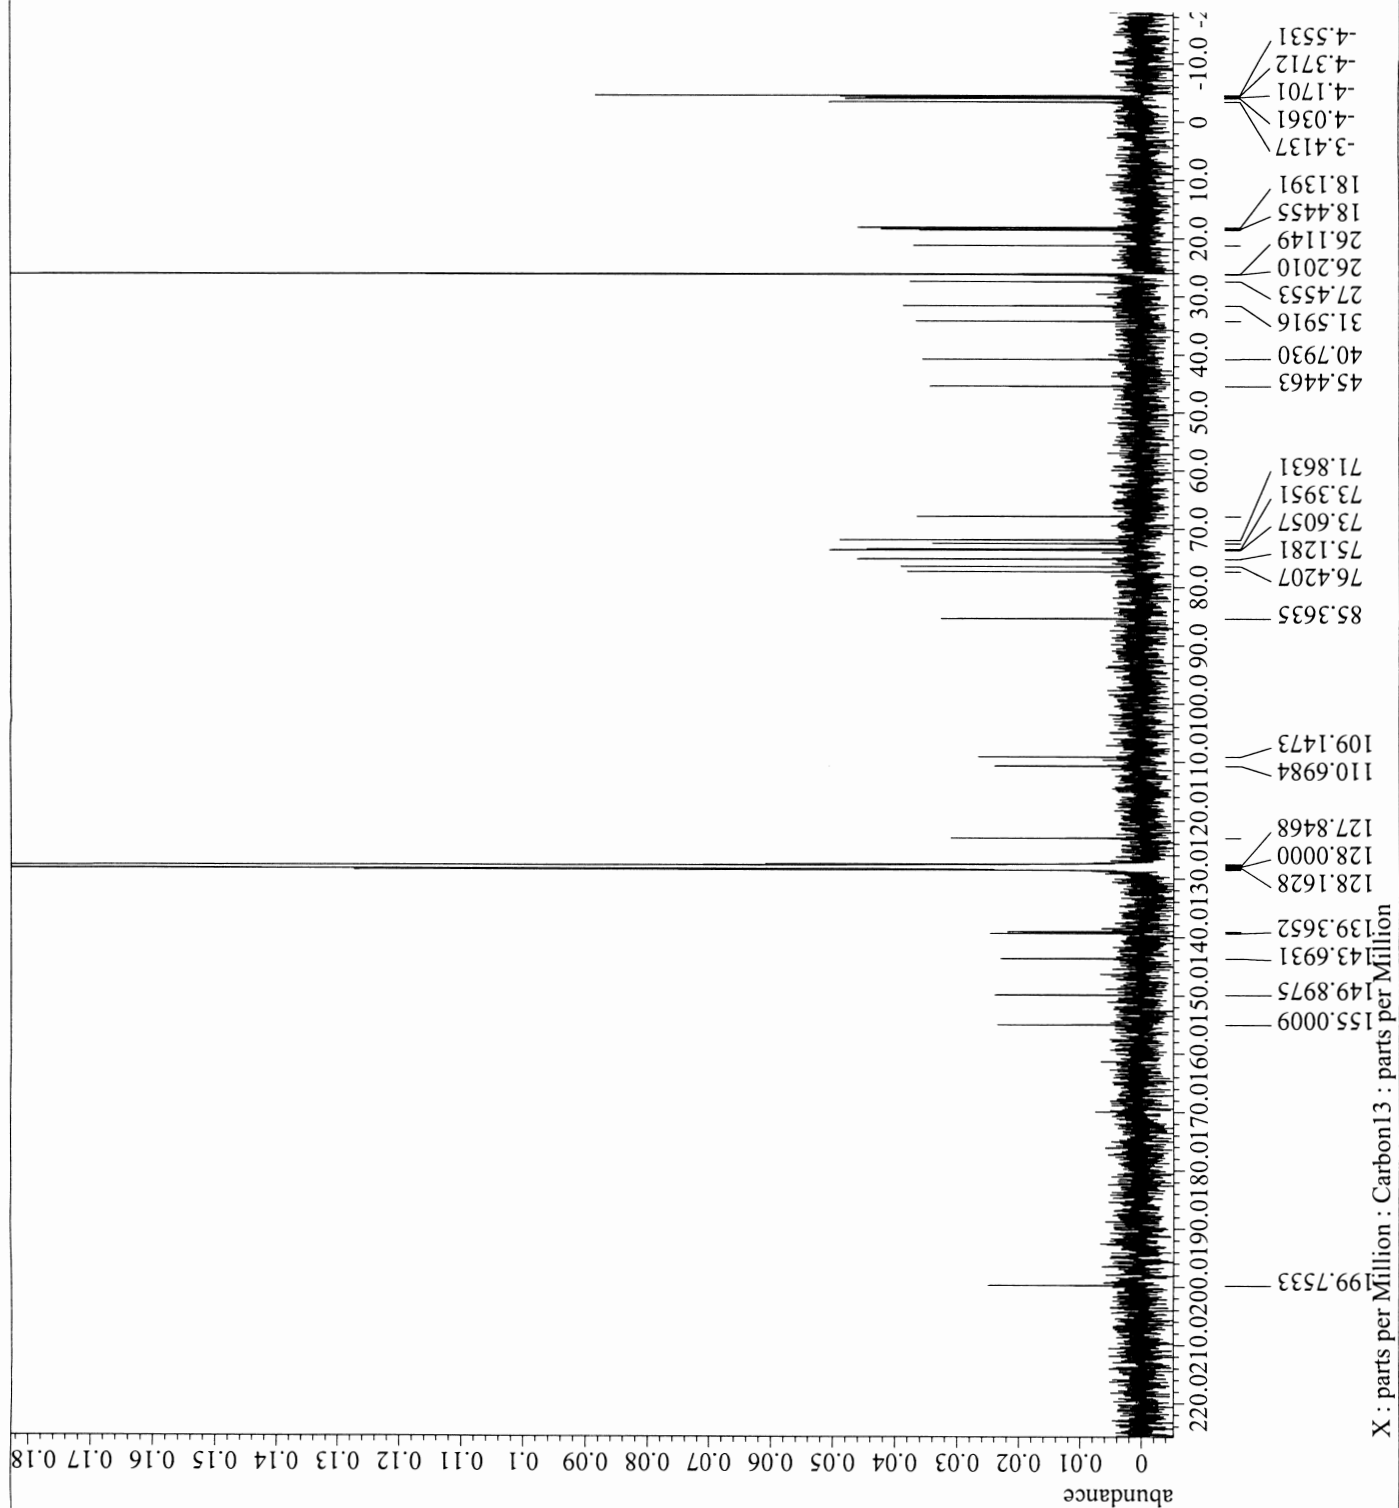

Filename = C:\Users\delta\Documents\J  
 Author = delta  
 Experiment = carbon.jpg  
 Sample Id = MN-III-163\_c6d6  
 Solvent = BENZENE-D6  
 Creation\_Time = 6-AUG-2010 17:21:39  
 Revision\_Time = 26-NOV-2010 18:47:21  
 Current\_Time = 26-NOV-2010 18:47:39  
 Comment = single pulse decoupled gat  
 Data\_Format = 1D REAL  
 Dim\_Size = 26214  
 Dim\_Title = Carbon13  
 Dim\_Units = [ppm]  
 Dimensions = X  
 Site = ECA600  
 Spectrometer = DELTA2\_NMR  
 Field\_Strength = 14.09636928[T] (600 [MHz])  
 X\_Acq\_Duration = 0.69206016[s]  
 X\_Domain = 13C  
 X\_Freq = 150.91343039 [MHz]  
 X\_Offset = 100 [ppm]  
 X\_Points = 32768  
 X\_Prescans = 4  
 X\_Resolution = 1.44496109 [Hz]  
 X\_Sweep = 47.34848485 [kHz]  
 X\_Sweep\_Clippped = 37.87878788 [kHz]  
 Irr\_Domain = Proton  
 Irr\_Freq = 600.1723046 [MHz]  
 Irr\_Offset = 5 [ppm]  
 Clipped = FALSE  
 Scans = 480  
 Total\_Scans = 480  
 Relaxation\_Delay = 2 [s]  
 Recvr\_Gain = 50  
 Temp\_Get = 23.6 [dC]  
 X\_90\_Width = 8.4 [us]  
 X\_Acq\_Time = 0.69206016 [s]  
 X\_Angle = 30 [deg]  
 X\_Atn = 6.4 [dB]  
 X\_Pulse = 2.8 [us]  
 Irr\_Atn\_Dec = 18 [dB]  
 Irr\_Atn\_Noise = 18 [dB]  
 Irr\_Noise = WALTZ  
 Irr\_Pwidth = 76 [us]  
 Decoupling = TRUE  
 Initial\_Wait = 1 [s]  
 Noe = TRUE  
 Noe\_Time = 2 [s]  
 Repetition\_Time = 2.69206016 [s]

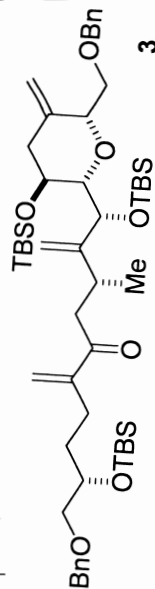

X : parts per Million : Carbon13 : parts per Million

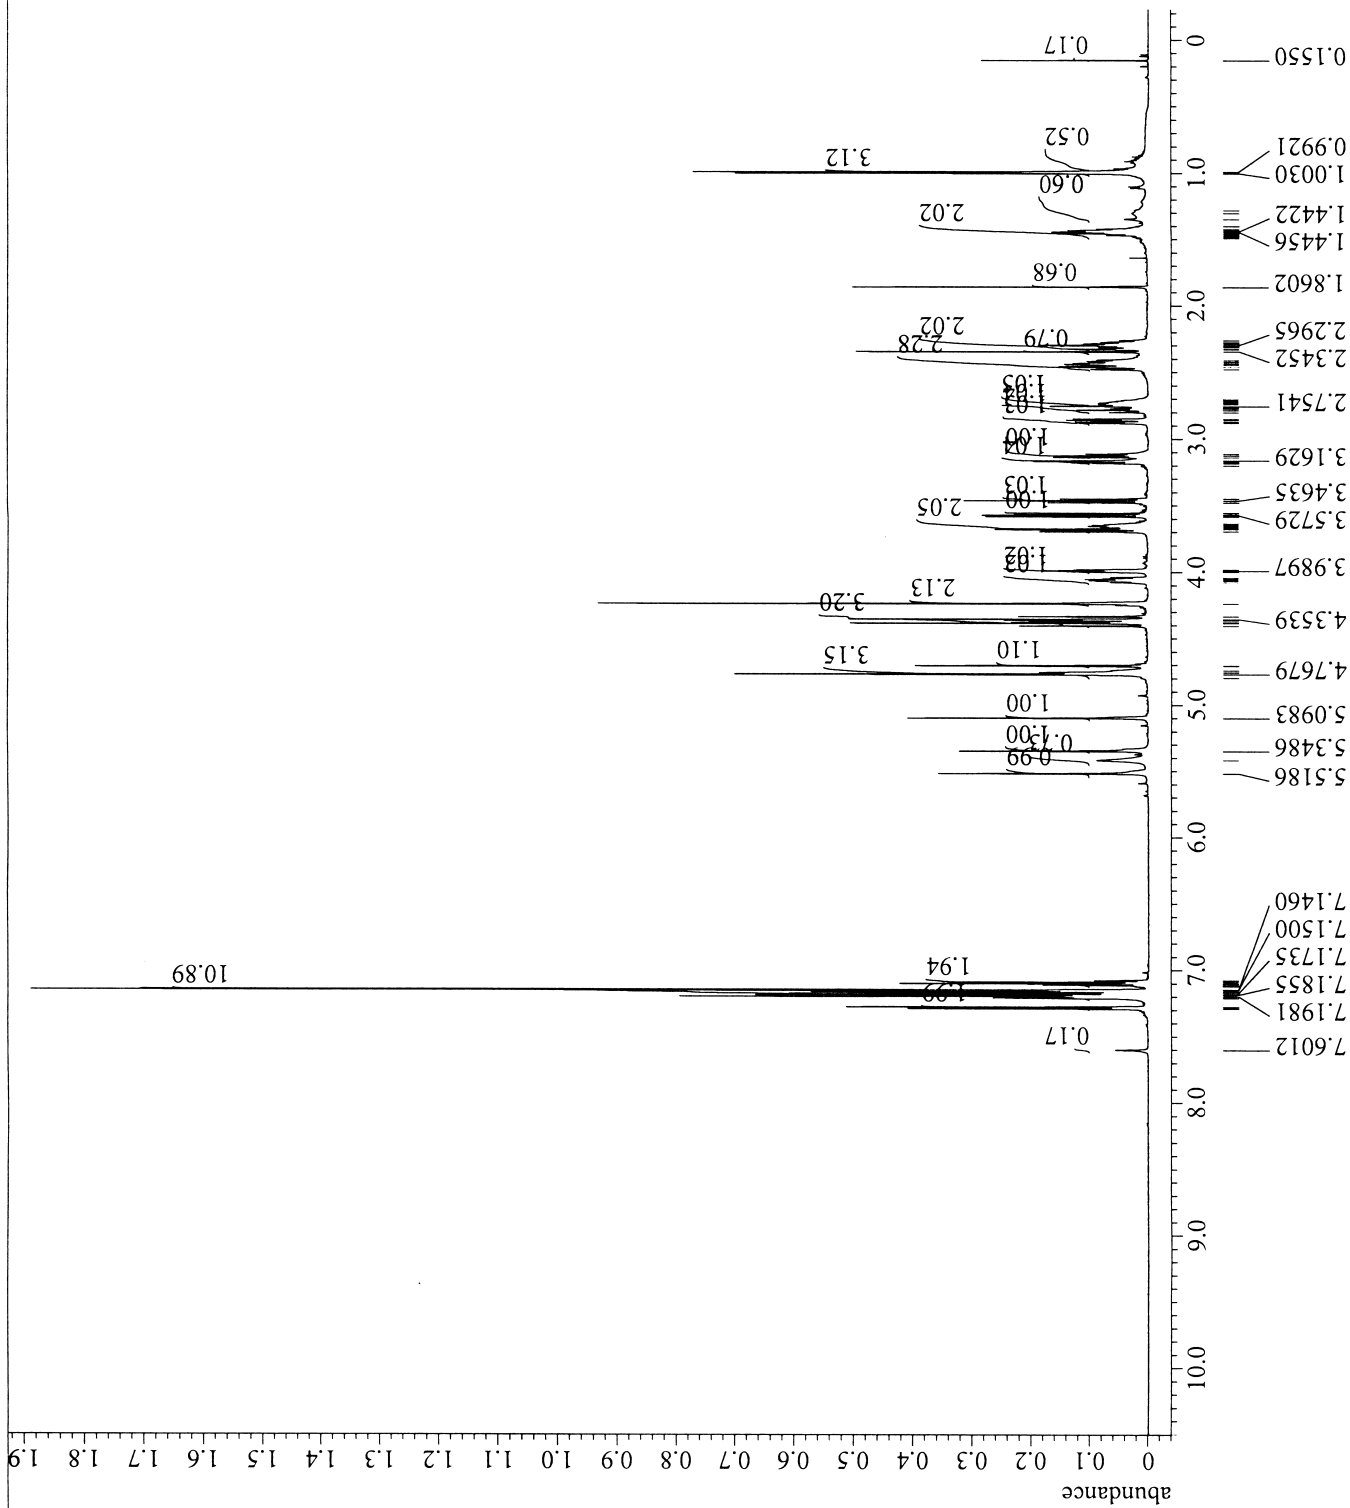

X : parts per Million : Proton : parts per Million

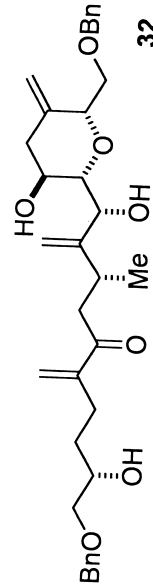

32

```

Filename = C:\Users\delta\Documents\J
Author = delta
Experiment = Proton.jpg
Sample_Id = MN-III-165
Solvent = BENZENE-D6
Creation_Time = 11-AUG-2010 20:13:09
Revision_Time = 15-NOV-2010 19:28:43
Current_Time = 15-NOV-2010 19:29:08

Comment = single_pulse
Data_Format = 1D_COMPLEX
Dim_Size = 26214
Dim_Title = Proton
Dim_Units = [ppm]
Dimensions = x
Site = ECA600
Spectrometer = DELTA2_NMR

Field_Strength = 14.09636928[T] (600 [MHz])
X_Acq_Duration = 2.9097984[s]
X_Domain = 1H
X_Freq = 600.1723046[MHz]
X_Offset = 5[ppm]
X_Points = 32768
X_Prescans = 1
X_Resolution = 0.34366642[Hz]
X_Sweep = 11.26126126[kHz]
X_Sweep_Clippped = 9.00900901[kHz]
Irr_Domain = Proton
Irr_Freq = 600.1723046[MHz]
Irr_Offset = 5[ppm]
Tri_Domain = Proton
Tri_Freq = 600.1723046[MHz]
Tri_Offset = 5[ppm]
Clipped = FALSE
Scans = 8
Total_Scans = 8

Relaxation_Delay = 1[s]
Recvr_Gain = 38
Temp_Get = 22.8[dc]
X_90_Width = 12.4[us]
X_Acq_Time = 2.9097984[s]
X_Angle = 45[deg]
X_Atn = 3[db]
X_Pulse = 6.2[us]
Irr_Mode = Off
Tri_Mode = Off
Dante_Presat = FALSE
Initial_Wait = 1[s]
Repetition_Time = 3.9097984[s]
    
```



|                  |                              |
|------------------|------------------------------|
| Filename         | = C:\Users\delta\Documents\  |
| Author           | = delta                      |
| Experiment       | = carbon.jpg                 |
| Sample_Id        | = MN-III-165                 |
| Solvent          | = BENZENE-D6                 |
| Creation_Time    | = 11-AUG-2010 20:15:29       |
| Revision_Time    | = 11-AUG-2010 20:29:36       |
| Current_Time     | = 11-AUG-2010 20:31:33       |
| Comment          | = single pulse decoupled gat |
| Data_Format      | = 1D REAL                    |
| Dim_Size         | = 26214                      |
| Dim_Title        | = Carbon13                   |
| Dim_Units        | = [ppm]                      |
| Dimensions       | = X                          |
| Site             | = ECA600                     |
| Spectrometer     | = DELTA2_NMR                 |
| Field_Strength   | = 14.09636928[T] (600[MHz])  |
| X_Acq_Duration   | = 0.69206016[s]              |
| X_Domain         | = 13C                        |
| X_Freq           | = 150.91343039[MHz]          |
| X_Offset         | = 100[ppm]                   |
| X_Points         | = 32768                      |
| X_Prescans       | = 4                          |
| X_Resolution     | = 1.44496109[Hz]             |
| X_Sweep          | = 47.34848485[kHz]           |
| X_Sweep_Clippped | = 37.87878788[kHz]           |
| Irz_Domain       | = Proton                     |
| Irz_Freq         | = 600.1723046[MHz]           |
| Irz_Offset       | = 5[ppm]                     |
| Clipped          | = FALSE                      |
| Mod_Return       | = 1                          |
| Probe_Recovery   | = 20[us]                     |
| Scans            | = 188                        |
| Total_Scans      | = 188                        |
| X_90_Width       | = 8.4[us]                    |
| X_Acq_Time       | = 0.69206016[s]              |
| X_Angle          | = 30[deg]                    |
| X_Atn            | = 6.4[db]                    |
| X_Pulse          | = 2.8[us]                    |
| Irz_Atn_Dec      | = 18[db]                     |
| Irz_Atn_Noe      | = 18[db]                     |
| Irz_Noise        | = WALTZ                      |
| Irz_Width        | = 76[us]                     |
| Decoupling       | = TRUE                       |
| Initial_Wait     | = 1[s]                       |
| Noe              | = TRUE                       |
| Noe_Time         | = 2[s]                       |
| Recvr_Gain       | = 50                         |
| Relaxation_Delay | = 2[s]                       |
| Repetition_Time  | = 2.69206016[s]              |
| Temp_Get         | = 23.5[degC]                 |

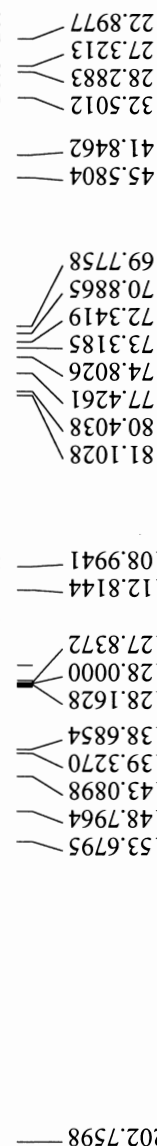

X: parts per Million : Carbon13 : parts per Million

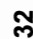

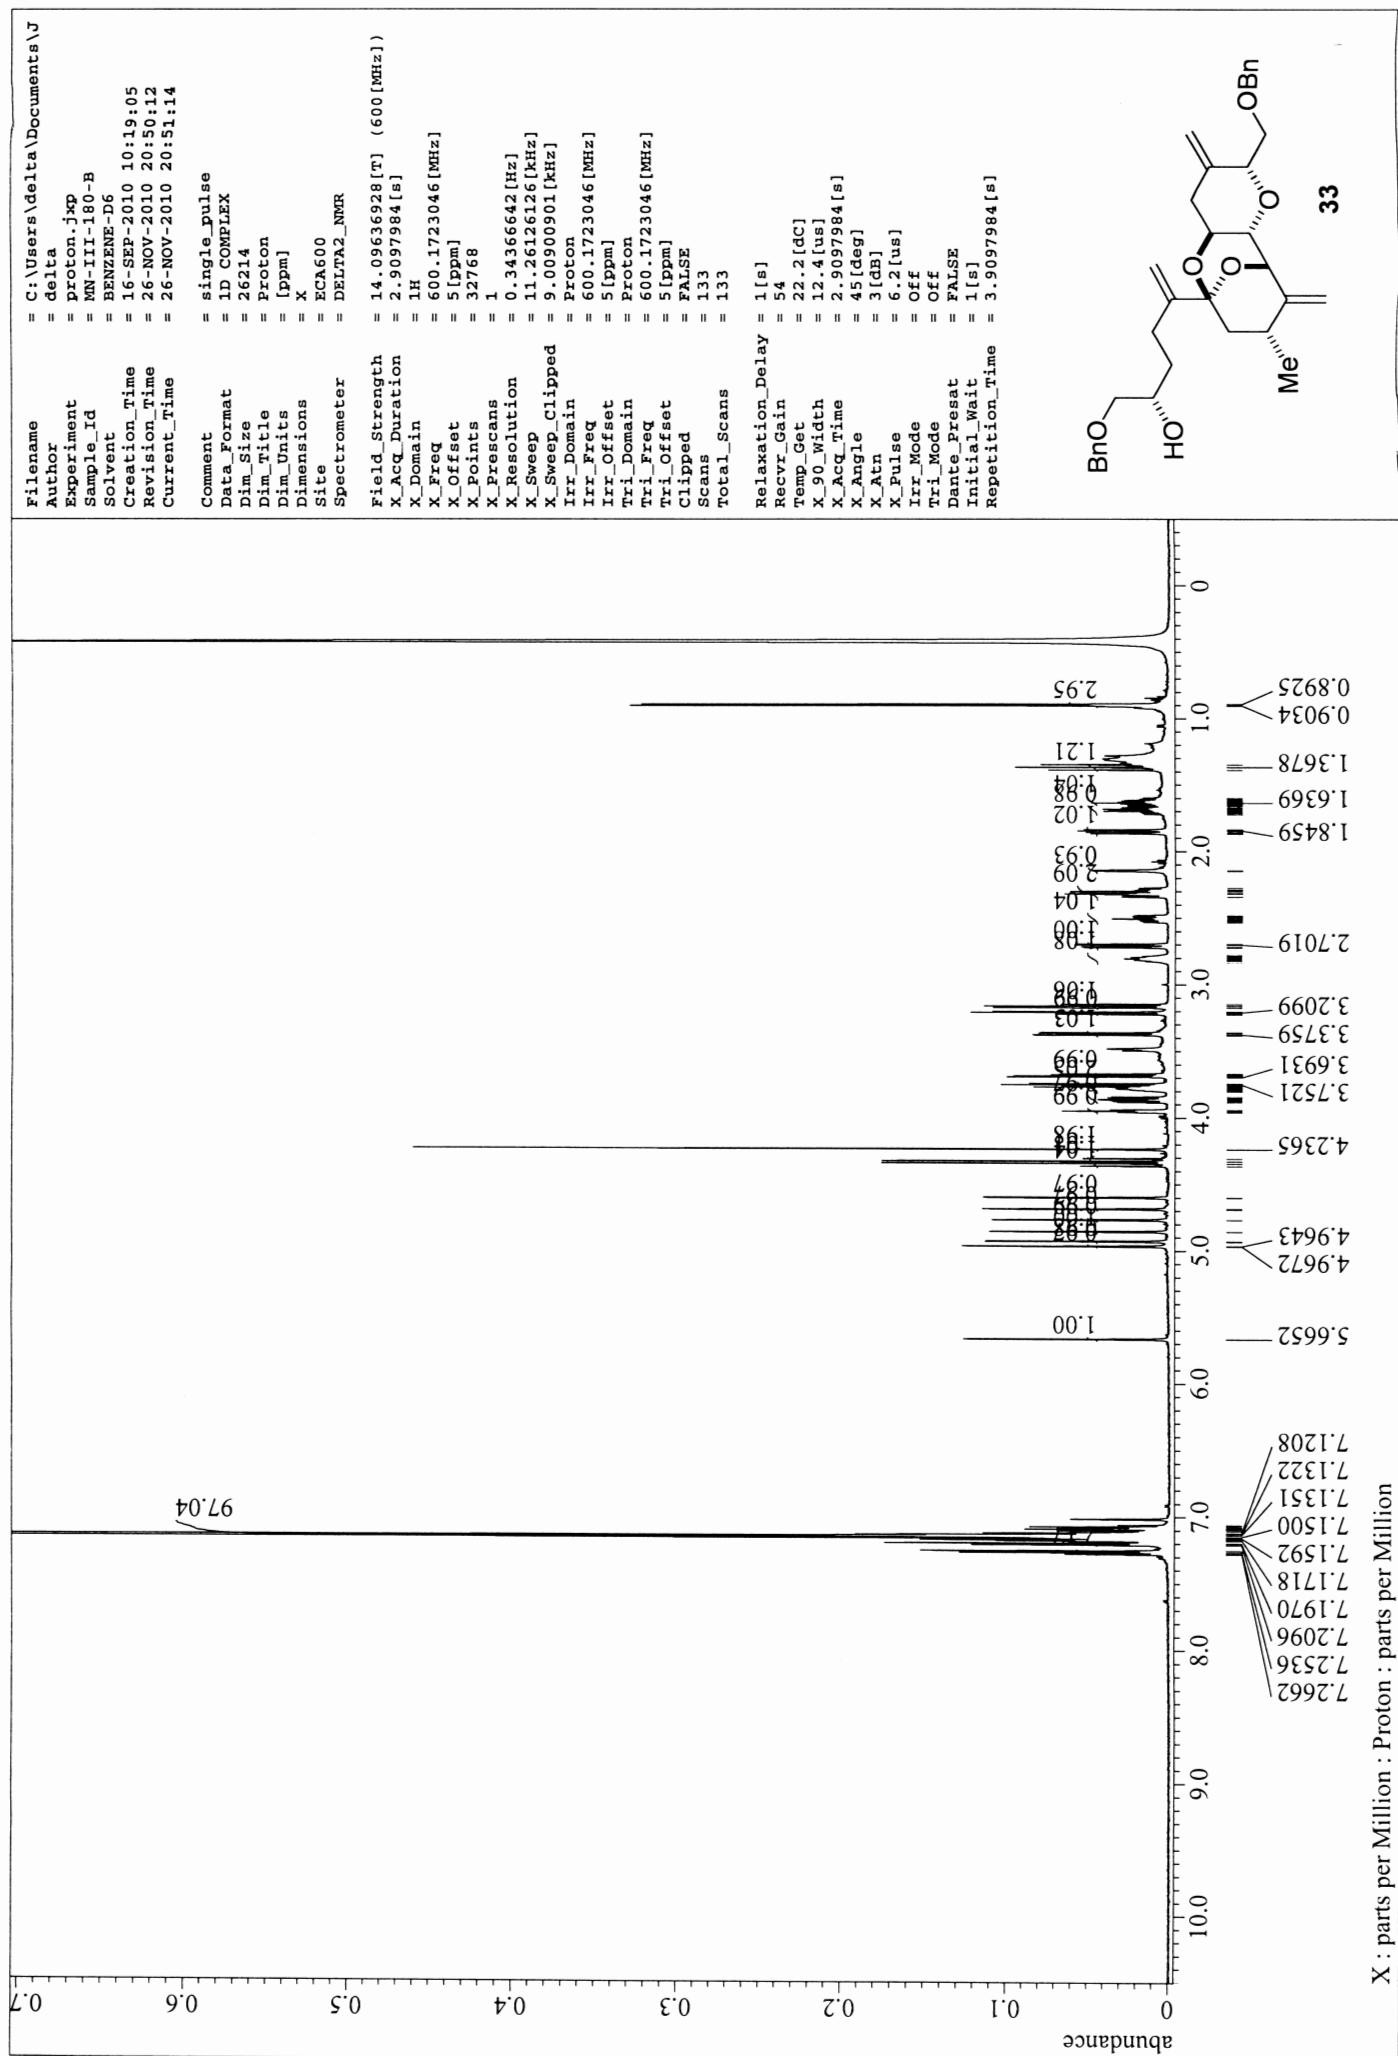

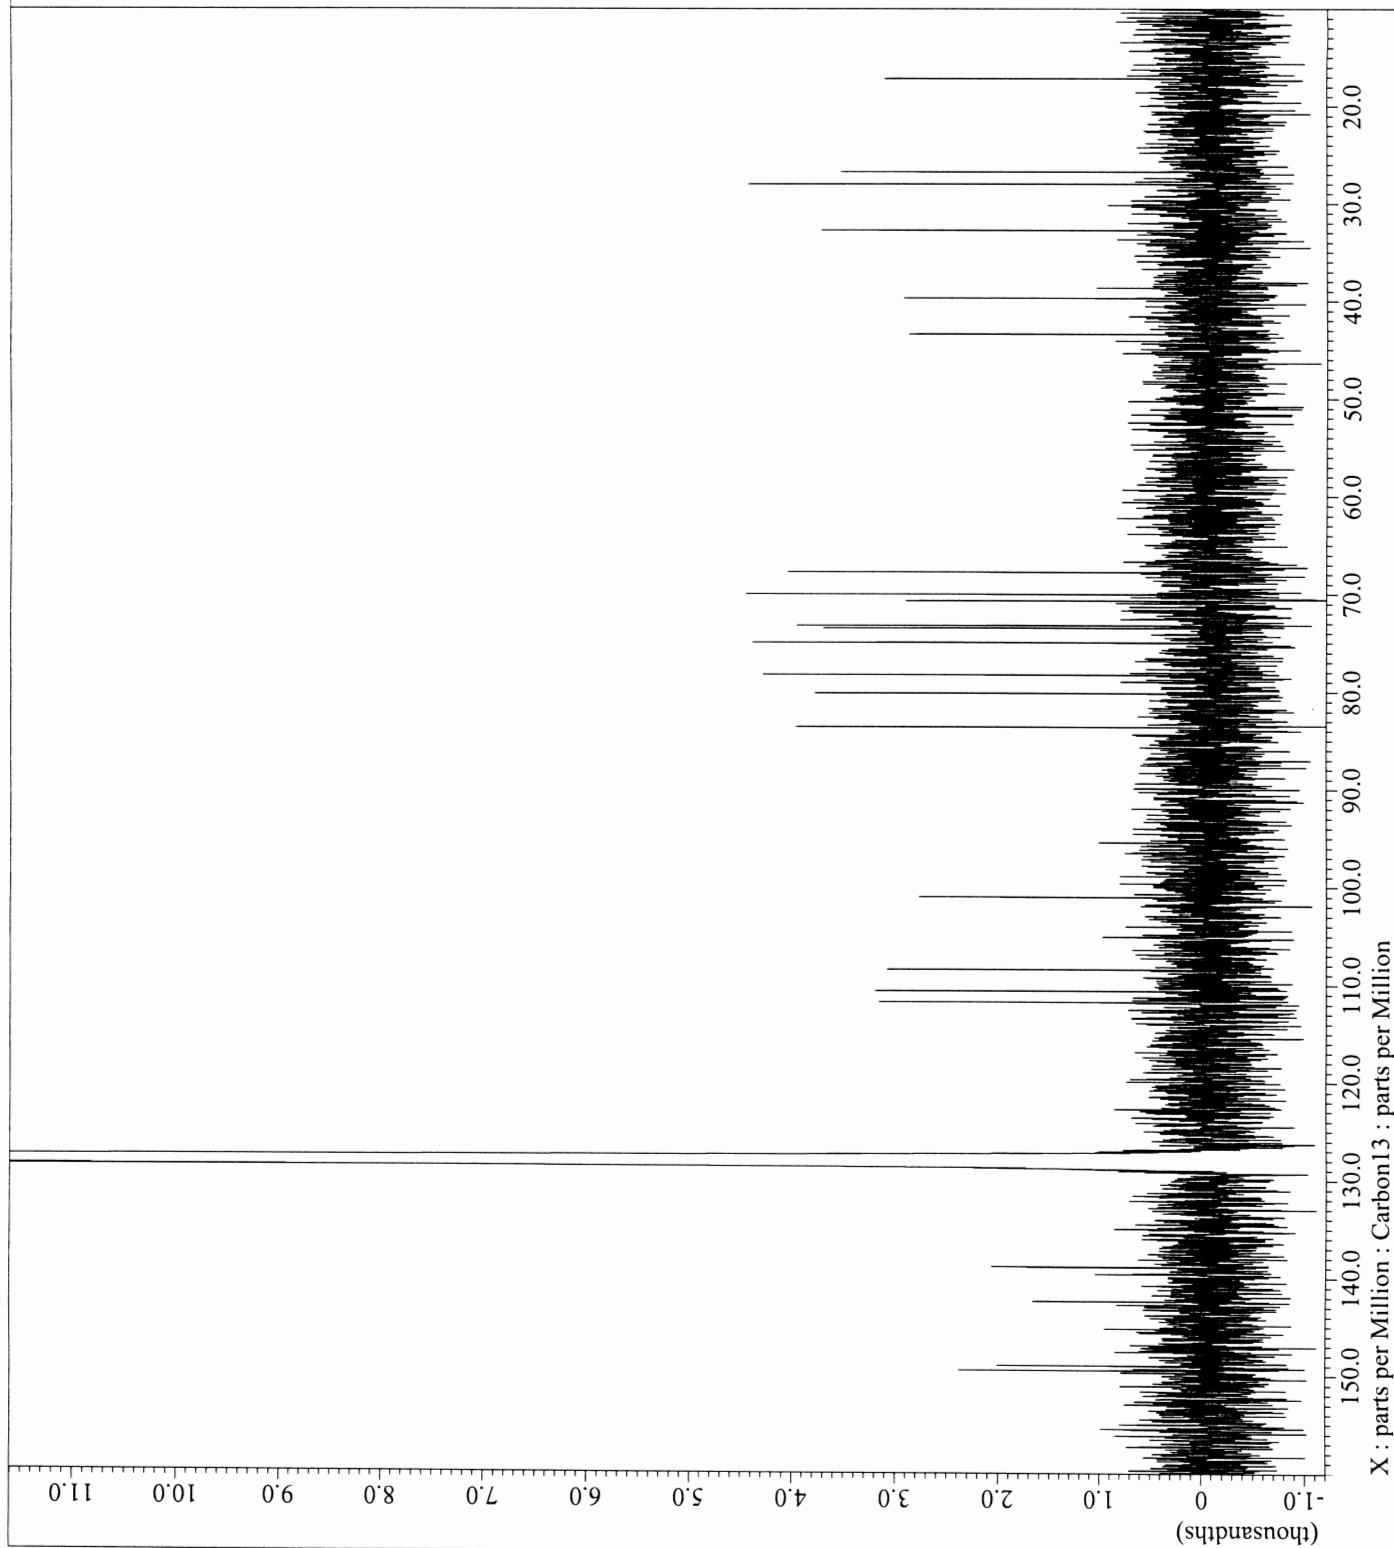

```

= C:\Users\delta\Documents\J
= delta
= carbon.jpg
= MN-III-180-B
= BENZENE-D6
= 20-SEP-2010 20:32:33
= 26-NOV-2010 19:14:33
= 26-NOV-2010 19:14:43

= single pulse decoupled gat
= 1D REAL
= 26214
= Carbon13
= [ppm]
= X
= ECA600
= DELTA2_NMR

= 14.09636928[T] (600 [MHz])
= 0.69206016[s]
= 13C
= 150.91343039 [MHz]
= 100 [ppm]
= 32768
= 4
= 1.44496109 [Hz]
= 47.34848485 [kHz]
= 37.87878788 [kHz]
= Proton
= 600.1723046 [MHz]
= 5 [ppm]
= FALSE
= 16816
= 16816

= 2[s]
= 50
= 23 [dC]
= 8.4 [us]
= 0.69206016[s]
= 30 [deg]
= 6.4 [dB]
= 2.8 [us]
= 18 [dB]
= 18 [dB]
= WALTZ
= 76 [us]
= TRUE
= 1[s]
= TRUE
= 2[s]

= 2.69206016[s]
= 2.69206016[s]

```

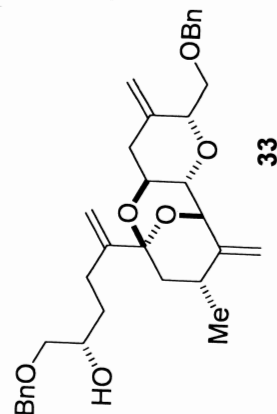

```

Filename = C:\Users\delta\Documents\
Author = delta
Experiment = proton.jpg
Sample_Id = MN-III-180-A-ushiro
Solvent = BENZENE-D6
Creation_Time = 16-SEP-2010 10:10:23
Revision_Time = 26-NOV-2010 20:40:08
Current_Time = 26-NOV-2010 20:40:36

Comment = single_pulse
Data_Format = 1D COMPLEX
Dim_Size = 26214
Dim Title = Proton
Dim_Units = [ppm]
Dimensions = X
Site = ECA600
Spectrometer = DELTA2_NMR

Field_Strength = 14.09636828[T] (600[MHz])
X_Acq_Duration = 2.9097984[s]
X_Domain = 1H
X_Freq = 600.1723046[MHz]
X_Offset = 5[ppm]
X_Points = 32768
X_Prescans = 1
X_Resolution = 0.34366642[Hz]
X_Sweep = 11.26126126[kHz]
X_Sweep_Clippped = 9.00900901[kHz]
Irr_Domain = Proton
Irr_Freq = 600.1723046[MHz]
Irr_Offset = 5[ppm]
Irr1_Domain = Proton
Irr1_Freq = 600.1723046[MHz]
Irr1_Offset = 5[ppm]
Clipped = FALSE
Scans = 45
Total_Scans = 45

Relaxation_Delay = 1[s]
Recvr_Gain = 50
Temp_Get = 22.1[ $^{\circ}$ C]
X_X90_Width = 12.4[us]
X_X90_Acq_Time = 2.9097984[s]
X_Angle = 45[deg]
X_Atn = 3[ $\mu$ B]
X_Pulse = 6.2[us]
Irr_Mode = Off
Tri_Mode = Off
Dante_Presat = FALSE
Initial_Wait = 1[s]
Repetition_Time = 3.9097984[s]

```

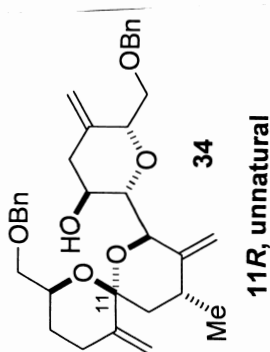

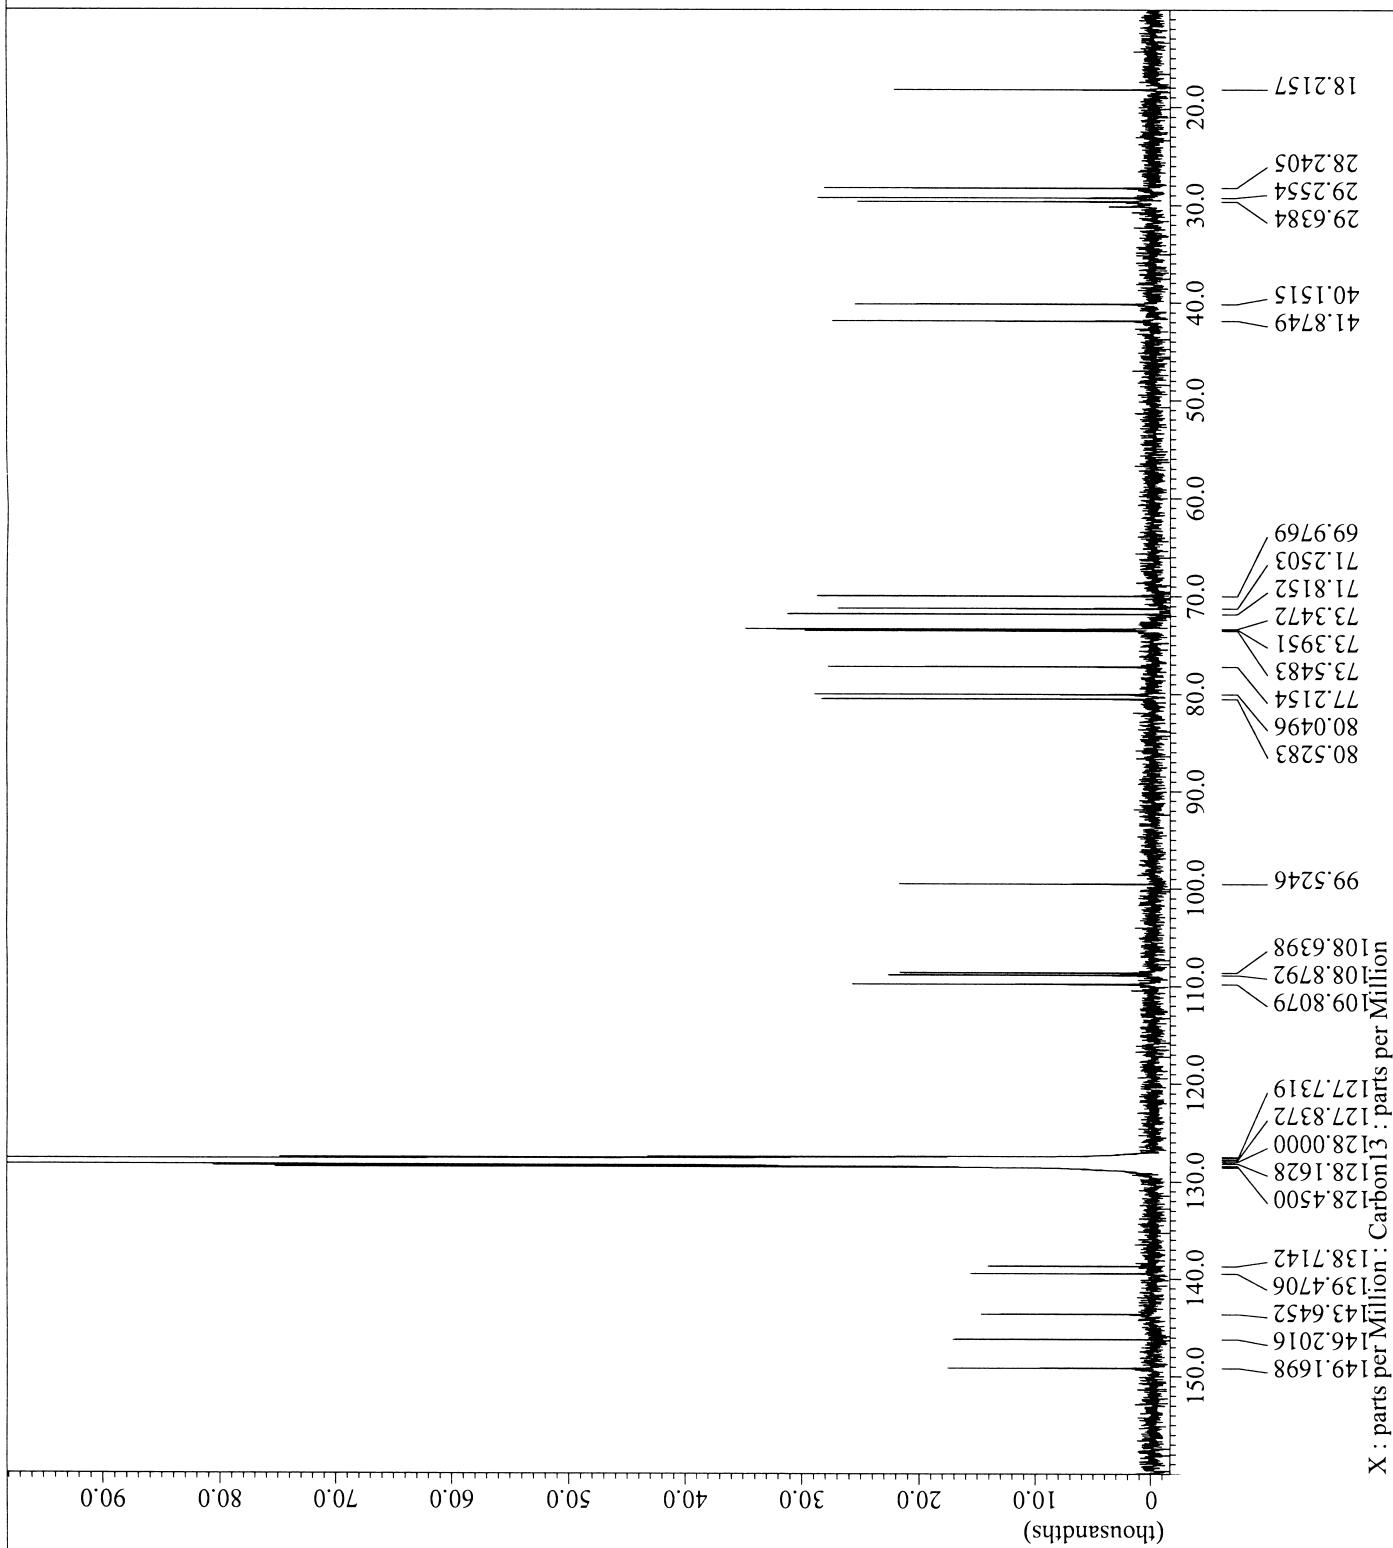

Filename = C:\Users\delta\Documents\J  
 Author = delta  
 Experiment = carbon-jxp  
 Sample\_Id = MN-III-180-A-ushiro  
 Solvent = BENZENE-D6  
 Creation\_Time = 19-SEP-2010 15:31:08  
 Revision\_Time = 26-NOV-2010 19:36:02  
 Current\_Time = 26-NOV-2010 19:36:56  
 Comment = single pulse decoupled gat  
 Data\_Format = 1D REAL  
 Dim\_Size = 26214  
 Dim\_Title = Carbon13  
 Dim\_Units = [ppm]  
 Dimensions = X  
 Site = ECA600  
 Spectrometer = DELTA2\_NMR  
 Field\_Strength = 14.09636928[T] (600 [MHz])  
 X\_Acq\_Duration = 0.69206016[s]  
 X\_Domain = 13C  
 X\_Freq = 150.91343039 [MHz]  
 X\_Offset = 100 [ppm]  
 X\_Points = 32768  
 X\_Prescans = 4  
 X\_Resolution = 1.44496109 [Hz]  
 X\_Sweep = 47.34848485 [kHz]  
 X\_Sweep\_Clip = 37.87878788 [kHz]  
 Irr\_Domain = Proton  
 Irr\_Freq = 600.1723046 [MHz]  
 Irr\_Offset = 5 [ppm]  
 Clipped = FALSE  
 Scans = 10000  
 Total\_Scans = 10000  
 Relaxation\_Delay = 2 [s]  
 Recvr\_Gain = 52  
 Temp\_Get = 23.5 [deg]  
 X\_90\_Width = 8.4 [us]  
 X\_Acq\_Time = 0.69206016 [s]  
 X\_Angle = 30 [deg]  
 X\_Atn = 6.4 [dB]  
 X\_Pulse = 2.8 [us]  
 Irr\_Atn\_Dec = 18 [dB]  
 Irr\_Atn\_Noe = 18 [dB]  
 Irr\_Noise = WALTZ  
 Irr\_Width = 76 [us]  
 Decoupling = TRUE  
 Initial\_Wait = 1 [s]  
 Noe = TRUE  
 Noe\_Time = 2 [s]  
 Repetition\_Time = 2.69206016 [s]

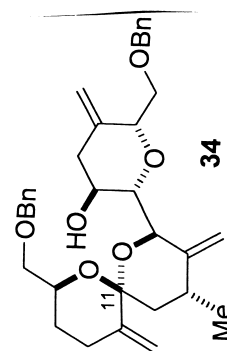

11R, unnatural

X : parts per Million : Carbon13 : parts per Million

```
= C:\Users\delta\Documents\
= delta
= proton.jpg
= MN-III-180-A-before
= BENZENE-D6
= 17-SEP-2010 00:50:45
= 26-NOV-2010 20:29:23
= 26-NOV-2010 20:40:49

= single_pulse
= 1D_COMPLEX
= 26214
= Proton
= [ppm]
= X
= ECA600
= DELTA2_NMR

= 14.09636928[T] (600[MHz])
= 2.9097984[s]
= 1H
= 600.1723046[MHz]
= 5[ppm]
= 32768
= 1
= 0.34366642[Hz]
= 11.26126126[kHz]
= 9.00900901[kHz]
= Proton
= 600.1723046[MHz]
= 5[ppm]
= Proton
= 600.1723046[MHz]
= 5[ppm]
= FALSE
= 8
= 8

Relaxation_Delay = 1[s]
Recvr_Gain = 50
Temp_Get = 22.1[ $^{\circ}$ C]
X_90_Width = 12.4[ $\mu$ s]
X_X_Acq_Time = 2.9097984[s]
X_Angle = 45[deg]
X_Atn = 3[db]
X_X_Pulse = 6.2[ $\mu$ s]
Irr_Mode = Off
Tri_Mode = Off
Dante_Presat = FALSE
Initial_Wait = 1[s]
Repetition_Time = 3.9097984[s]
```

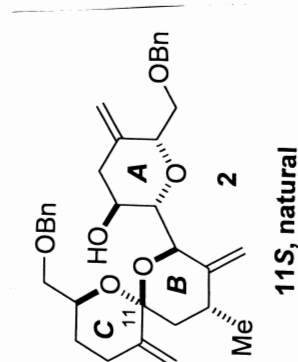

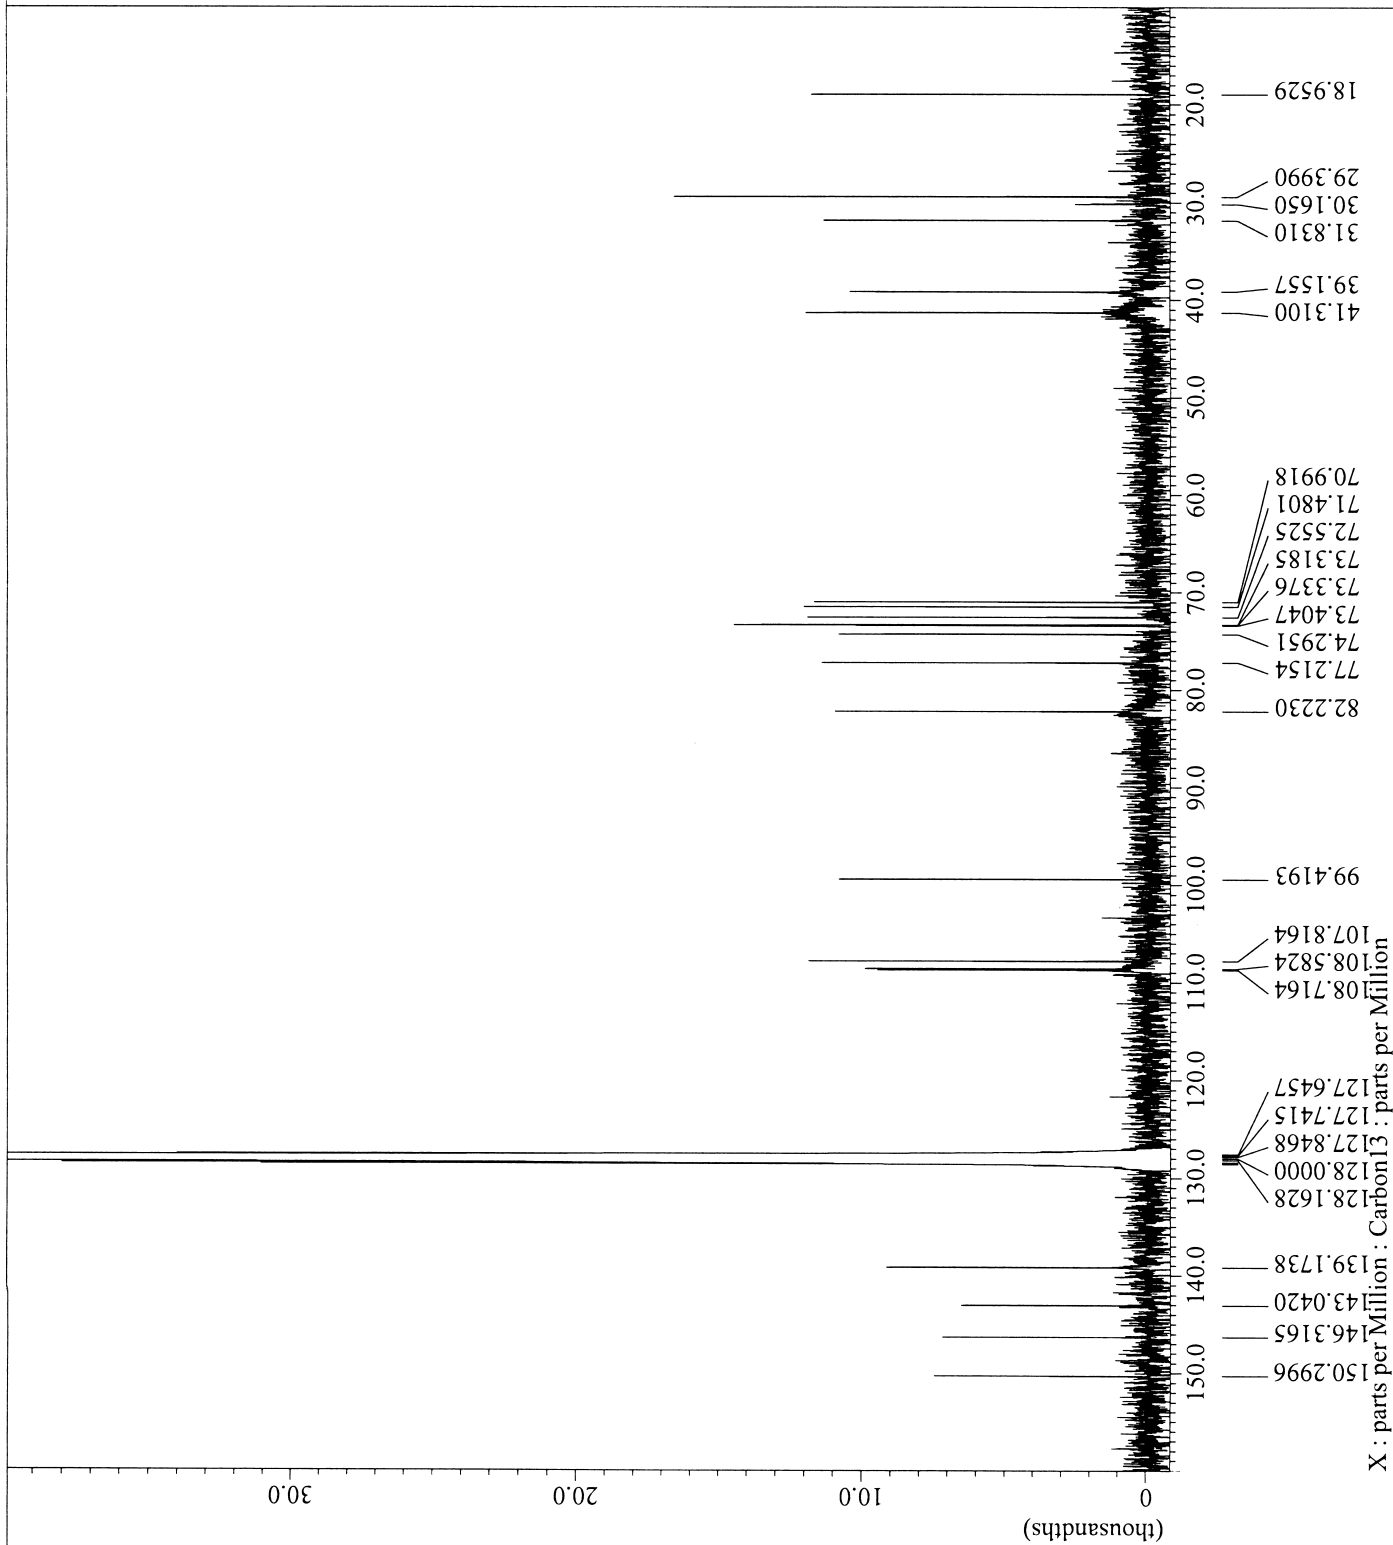

X : parts per Million : Carbon13 : parts per Million

```

Filename      = C:\Users\delta\Documents\J
Author        = delta
Experiment    = carbon.jxp
Sample_Id     = MN-III-180-A-before
Solvent       = BENZENE-D6
Creation_Time = 17-SEP-2010 00:53:05
Revision_Time = 26-NOV-2010 19:40:13
Current_Time  = 26-NOV-2010 19:41:02

Comment       = single pulse decoupled gat
Data_Format   = 1D REAL
Dim_Size      = 26214
Dim_Title     = Carbon13
Dim_Units     = [ppm]
Dimensions    = X
Site          = ECA600
Spectrometer  = DELTA2_NMR

Field_Strength = 14.09636928[T] (600[MHz])
X_Acq_Duration = 0.69206016[s]
X_Domain       = 13C
X_Freq         = 150.91343039[MHz]
X_Offset       = 100[ppm]
X_Points       = 32768
X_Prescans     = 4
X_Resolution   = 1.44496109[Hz]
X_Sweep        = 47.34848485[kHz]
X_Sweep_Clipped = 37.87878788[kHz]
Irr_Domain     = Proton
Irr_Freq       = 600.1723046[MHz]
Irr_Offset     = 5[ppm]
Clipped        = FALSE
Scans          = 10921
Total_Scans    = 10921

Relaxation_Delay = 2[s]
Recvr_Gain       = 50
Temp_Get         = 23.2[dc]
X_90_Width       = 8.4[us]
X_Acq_Time       = 0.69206016[s]
X_Angle          = 30[deg]
X_Atn            = 6.4[db]
X_Pulse          = 2.8[us]
Irr_Atn_Dec      = 18[db]
Irr_Atn_Noe      = 18[db]
Irr_Noise        = WALTZ
Irr_Fwidth       = 76[us]
Decoupling       = TRUE
Initial_Wait     = 1[s]
Noe              = TRUE
Noe_time         = 2[s]
Repetition_Time  = 2.69206016[s]

```

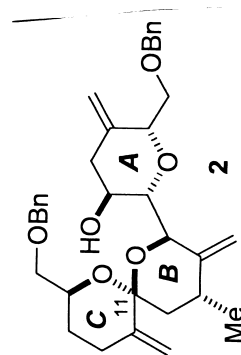

11S, natural
